# Supplementary material for: A China dataset of soil properties for land surface modelling (version 2, CSDLv2)
Source: Copernicus journal article supplement (doi:10.5194/essd-17-517-2025), 2025-02-07
Supplement: Supplementary file 1 [file essd-17-517-2025-supplement.pdf]

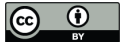

*Supplement of*

## **A China dataset of soil properties for land surface modelling (version 2, CSDLv2)**

**Gaosong Shi et al.**

*Correspondence to:* Wei Shangguan ([shgwei@mail.sysu.edu.cn](mailto:shgwei@mail.sysu.edu.cn))

The copyright of individual parts of the supplement might differ from the article licence.

**Contents**

- S1 The frequency distributions of soil properties** ..... 1
- S2 Bulk density (BD)** ..... 2
  - S2.1 Prediction maps ..... 2
  - S2.2 Accuracy assessment ..... 3
  - S2.3 Variable importance ..... 4
- S3 Sand** ..... 5
  - S3.1 Prediction maps ..... 5
  - S3.2 Accuracy assessment ..... 6
  - S3.3 Variable importance ..... 7
- S4 Silt** ..... 8
  - S4.1 Prediction maps ..... 8
  - S4.2 Accuracy assessment ..... 9
  - S4.3 Variable importance ..... 10
- S5 Clay** ..... 11
  - S5.1 Prediction maps ..... 11
  - S5.2 Accuracy assessment ..... 12
  - S5.3 Variable importance ..... 13
- S6 Rock fragment (gravel)** ..... 14
  - S6.1 Prediction maps ..... 14
  - S6.2 Accuracy assessment ..... 15
  - S6.3 Variable importance ..... 16
- S7 Porosity** ..... 17
  - S7.1 Prediction maps ..... 17
  - S7.2 Accuracy assessment ..... 18
  - S7.3 Variable importance ..... 19
- S8 Red (R) of wet soil color** ..... 20
  - S8.1 Prediction maps ..... 20
  - S8.2 Accuracy assessment ..... 21
  - S8.3 Variable importance ..... 22
- S9 Green (G) of wet soil color** ..... 23
  - S9.1 Prediction maps ..... 23
  - S9.2 Accuracy assessment ..... 24

|                                                 |    |
|-------------------------------------------------|----|
| S9.3 Variable importance .....                  | 25 |
| <b>S10 Blue (B) of wet soil color</b> .....     | 26 |
| S10.1 Prediction maps .....                     | 26 |
| S10.2 Accuracy assessment .....                 | 27 |
| S10.3 Variable importance .....                 | 28 |
| <b>S11 Red (R) of dry soil color</b> .....      | 29 |
| S11.1 Prediction maps .....                     | 29 |
| S11.2 Accuracy assessment .....                 | 30 |
| S11.3 Variable importance .....                 | 31 |
| <b>S12 Green (G) of dry soil color</b> .....    | 32 |
| S12.1 Prediction maps .....                     | 32 |
| S12.2 Accuracy assessment .....                 | 33 |
| S12.3 Variable importance .....                 | 34 |
| <b>S13 Blue (B) of dry soil color</b> .....     | 35 |
| S13.1 Prediction maps .....                     | 35 |
| S13.2 Accuracy assessment .....                 | 36 |
| S13.3 Variable importance .....                 | 37 |
| <b>S14 Wet soil colours</b> .....               | 38 |
| S14.1 Prediction maps .....                     | 38 |
| <b>S15 Dry soil colours</b> .....               | 39 |
| S15.1 Prediction maps .....                     | 39 |
| <b>S16 pH</b> .....                             | 40 |
| S16.1 Prediction maps .....                     | 40 |
| S16.2 Accuracy assessment .....                 | 41 |
| S16.3 Variable importance .....                 | 42 |
| <b>S17 Soil organic carbon (OC)</b> .....       | 43 |
| S17.1 Prediction maps .....                     | 43 |
| S17.2 Accuracy assessment .....                 | 44 |
| S17.3 Variable importance .....                 | 45 |
| <b>S18 Cation exchange capacity (CEC)</b> ..... | 46 |
| S18.1 Prediction maps .....                     | 46 |
| S18.2 Accuracy assessment .....                 | 47 |
| S18.3 Variable importance .....                 | 48 |
| <b>S19 Total nitrogen (TN)</b> .....            | 49 |

|                                                                                                                                                                                      |           |
|--------------------------------------------------------------------------------------------------------------------------------------------------------------------------------------|-----------|
| S19.1 Prediction maps .....                                                                                                                                                          | 49        |
| S19.2 Accuracy assessment .....                                                                                                                                                      | 50        |
| S19.3 Variable importance .....                                                                                                                                                      | 51        |
| <b>S20 Total phosphorus (TP)</b> .....                                                                                                                                               | <b>52</b> |
| S20.1 Prediction maps .....                                                                                                                                                          | 52        |
| S20.2 Accuracy assessment .....                                                                                                                                                      | 53        |
| S20.3 Variable importance .....                                                                                                                                                      | 54        |
| <b>S21 Total potassium (TK)</b> .....                                                                                                                                                | <b>55</b> |
| S21.1 Prediction maps .....                                                                                                                                                          | 55        |
| S21.2 Accuracy assessment .....                                                                                                                                                      | 56        |
| S21.3 Variable importance .....                                                                                                                                                      | 57        |
| <b>S22 Alkali-hydrolysable nitrogen (AN)</b> .....                                                                                                                                   | <b>58</b> |
| S22.1 Prediction maps .....                                                                                                                                                          | 58        |
| S22.2 Accuracy assessment .....                                                                                                                                                      | 59        |
| S22.3 Variable importance .....                                                                                                                                                      | 60        |
| <b>S23 Available potassium (AK)</b> .....                                                                                                                                            | <b>61</b> |
| S23.1 Prediction maps .....                                                                                                                                                          | 61        |
| S23.2 Accuracy assessment .....                                                                                                                                                      | 62        |
| S23.3 Variable importance .....                                                                                                                                                      | 63        |
| <b>S24 Available phosphorus (AP)</b> .....                                                                                                                                           | <b>64</b> |
| S24.1 Prediction maps .....                                                                                                                                                          | 64        |
| S24.2 Accuracy assessment .....                                                                                                                                                      | 65        |
| S24.3 Variable importance .....                                                                                                                                                      | 66        |
| <b>S25 Spatial details of total nitrogen (TN)</b> .....                                                                                                                              | <b>67</b> |
| <b>S26 Spatial details of rock fragment (gravel)</b> .....                                                                                                                           | <b>68</b> |
| <b>S27 Spatial details of porosity</b> .....                                                                                                                                         | <b>69</b> |
| <b>S28 Spatial details of alkali-hydrolysable nitrogen (AN)</b> .....                                                                                                                | <b>70</b> |
| <b>S29 Spatial details of available phosphorus (AP)</b> .....                                                                                                                        | <b>71</b> |
| <b>Table S1. List of environmental covariates used to characterize soil-forming environments.</b> .....                                                                              | <b>72</b> |
| <b>Table S2. Tuned model parameters for each soil property considered at 0-5 cm depth interval. See Table 1 for abbreviations and units of the soil properties considered.</b> ..... | <b>83</b> |
| <b>Table S3. Statistical description of soil properties at six depth intervals. Refer to Table 1 for the abbreviations and units of the soil properties interested.</b> .....        | <b>84</b> |

|                                                                                                                                                                                                                                                                                                                                                                                                                                                                                                                                                                                                                                                                                                |           |
|------------------------------------------------------------------------------------------------------------------------------------------------------------------------------------------------------------------------------------------------------------------------------------------------------------------------------------------------------------------------------------------------------------------------------------------------------------------------------------------------------------------------------------------------------------------------------------------------------------------------------------------------------------------------------------------------|-----------|
| <b>Table S4. Accuracy evaluation of the soil properties prediction with CSDLv2, CSDLv1, SoilGrids 2.0, and HWSD 2.0, based on the randomly held-back soil profiles. The "Number" column indicates the number of samples used during testing. See Table 1 for the abbreviations and units of the soil properties interested.....</b>                                                                                                                                                                                                                                                                                                                                                            | <b>89</b> |
| <b>Table S5. Predictive performance of CSDLv2, SoilGrids 2.0, CSDLv2, and HWSD 2.0 based on validation with testing profiles from WoSIS. Refer to Table 1 for the abbreviations and units of the soil properties interested.....</b>                                                                                                                                                                                                                                                                                                                                                                                                                                                           | <b>91</b> |
| <b>Table S6. Prediction interval coverage probability (PICP) for each soil property at multiple depths. Refer to Table 1 for the abbreviations and units of the soil properties interested. ....</b>                                                                                                                                                                                                                                                                                                                                                                                                                                                                                           | <b>93</b> |
| <b>Table S7. Comparison of predictive performance for mean predictions using random forest model and median predictions using quantile regression Forest model across different soil properties under 'All Data,' 'High Values,' and 'Low Values' conditions based on 10-fold cross-validation. The 'All Data' condition evaluates performance on the full training set, while 'High Values' and 'Low Values' assess prediction accuracy for extreme high and low values within the training set, respectively. The 'Prediction method' column documents the models constructed for generating final national-scale predictions at a 90-meter resolution for various soil properties. ....</b> | <b>94</b> |

# S1 The frequency distributions of soil properties

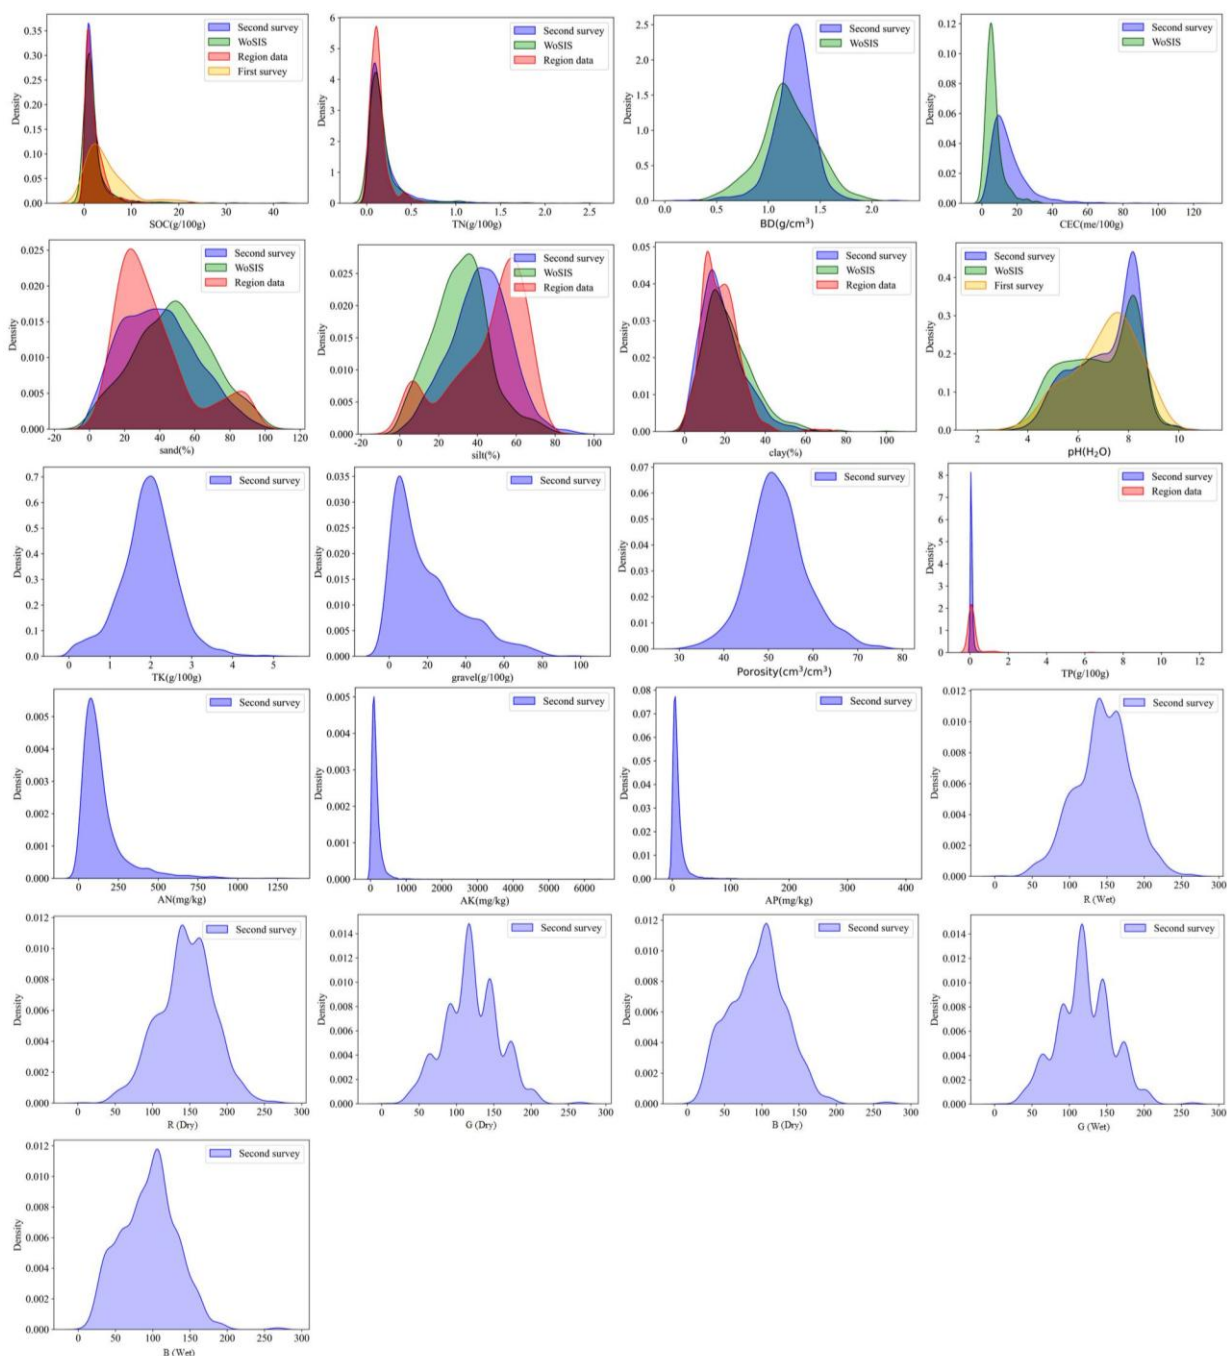

**Figure S1.** The frequency distributions of soil properties at 0-5 cm depth interval.

## S2 Bulk density (BD)

### 5 S2.1 Prediction maps

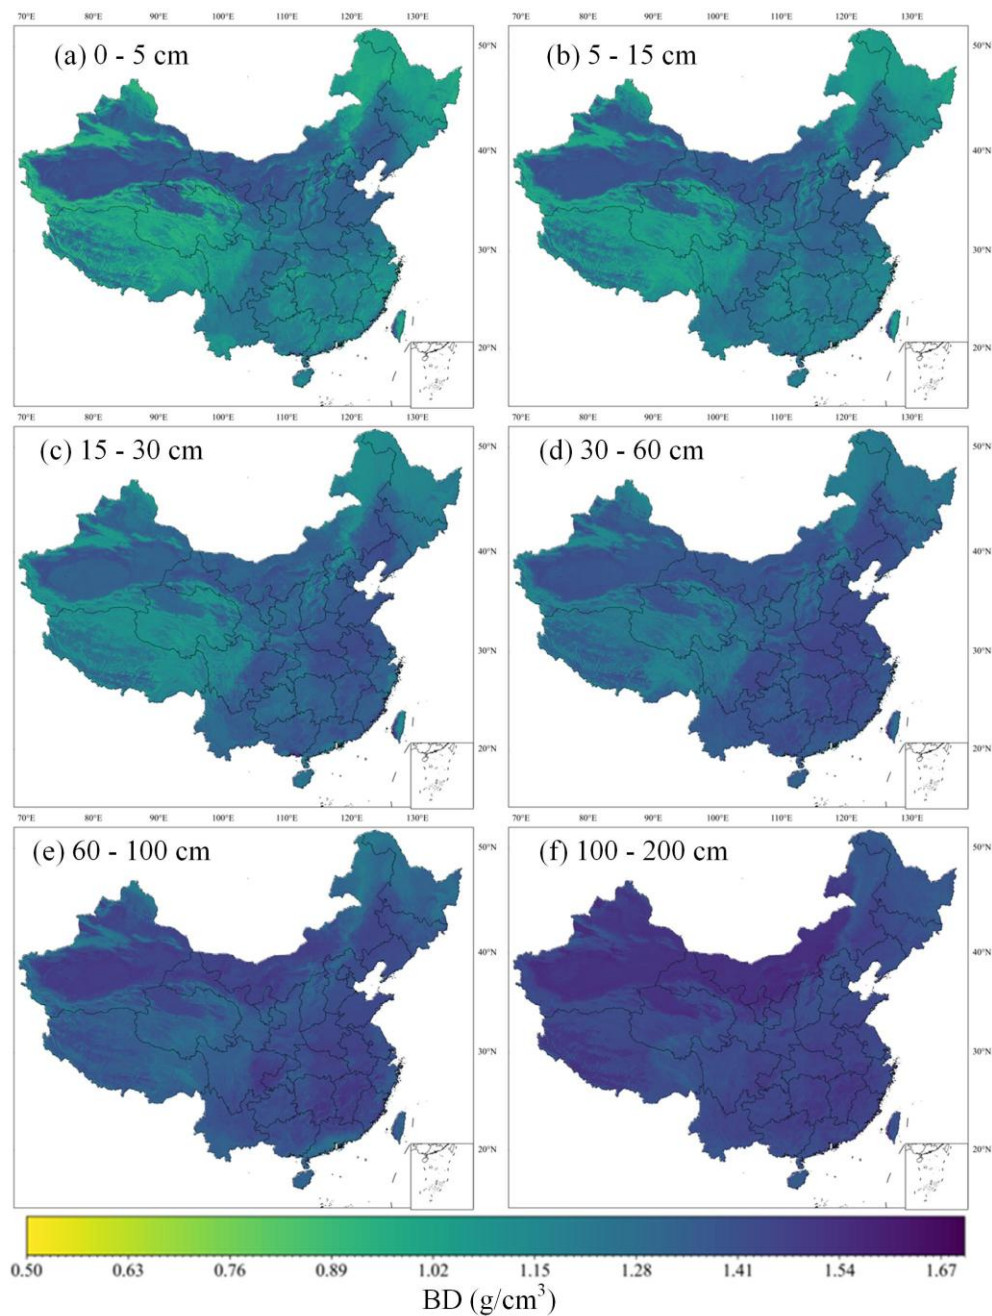

**Figure S2.** The predicted maps of bulk density (BD) at multiple depths (g/cm<sup>3</sup>). (a) 0-5 cm; (b) 5-15 cm; (c) 15-30 cm; (d) 30-60 cm; (e) 60-100 cm and (f) 100-200 cm depth interval.

## S2.2 Accuracy assessment

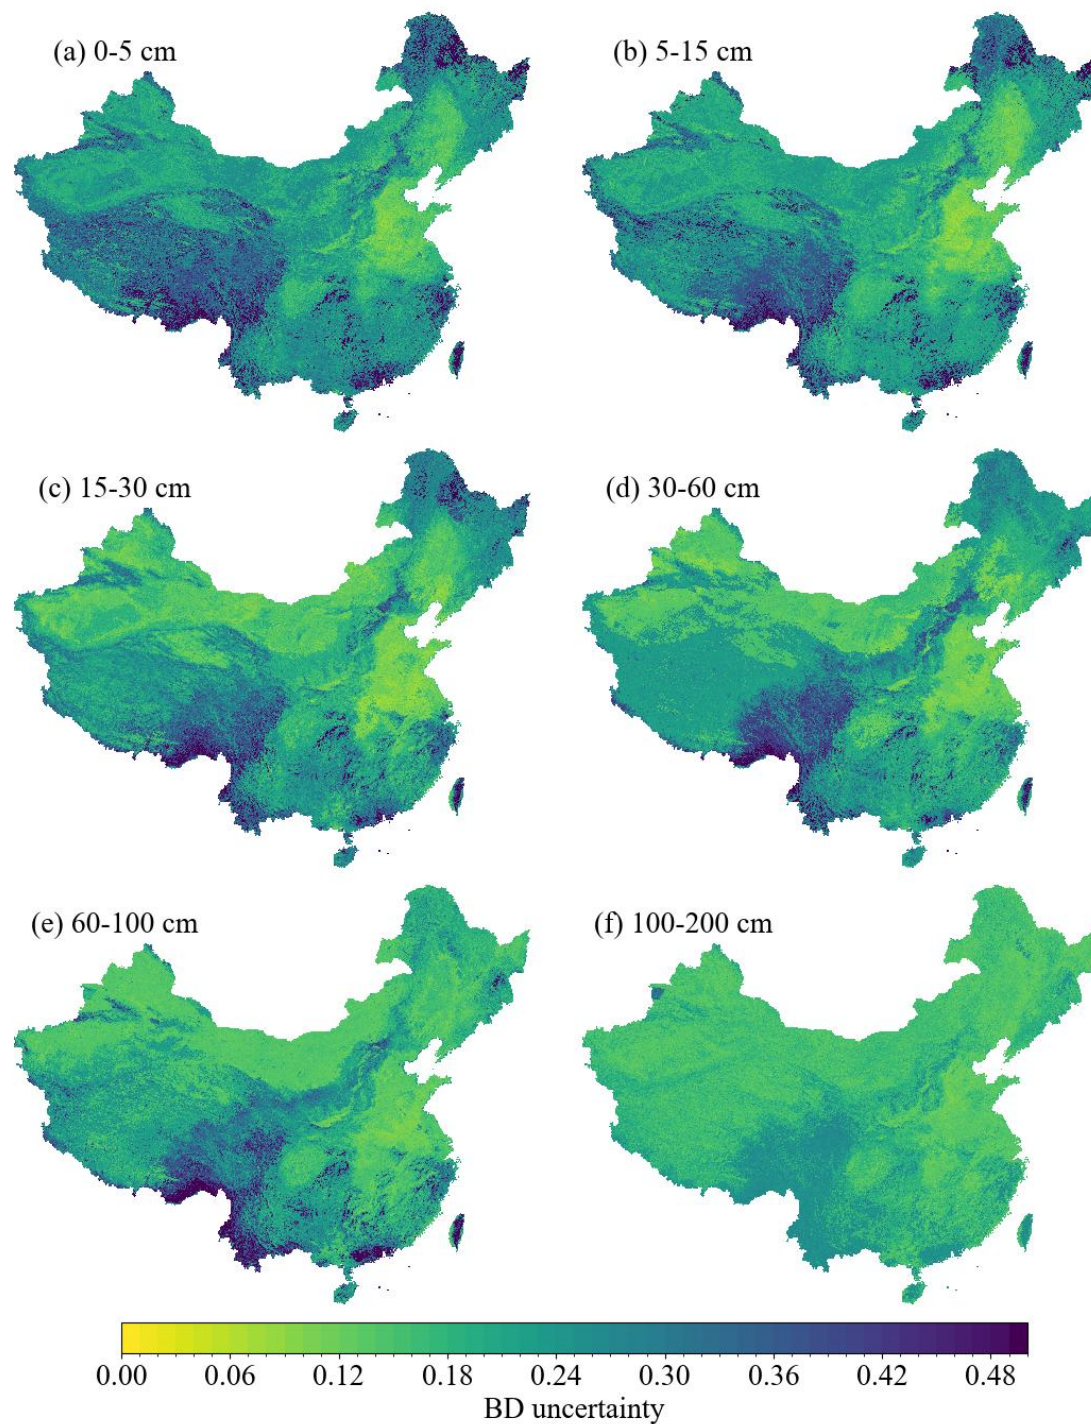

10

**Figure S3.** The maps of uncertainty of bulk density (BD) predictions at the six depth intervals.



## S2.3 Variable importance

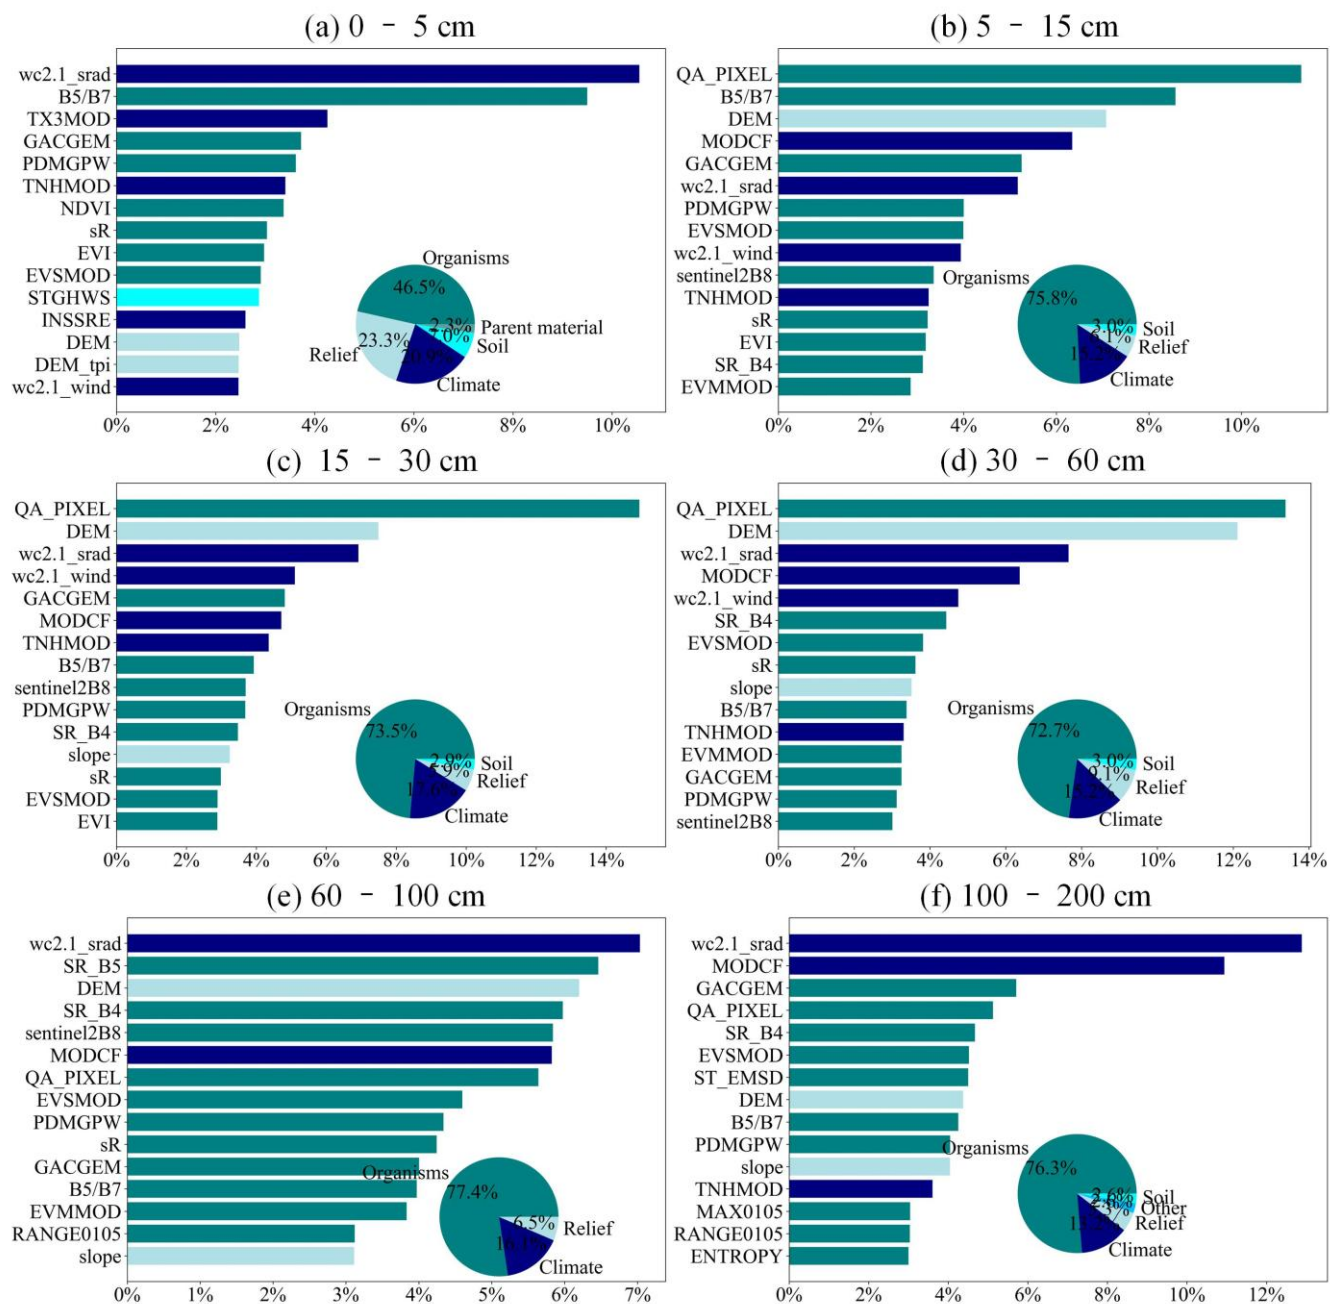

**Figure S4.** Relative importance of the top 15 predictors for the Quantile Regression Forest model in the spatial predictions of bulk density (BD) at the six depth intervals. See Table S6 for abbreviations of the environmental covariates.

## S3 Sand

### S3.1 Prediction maps

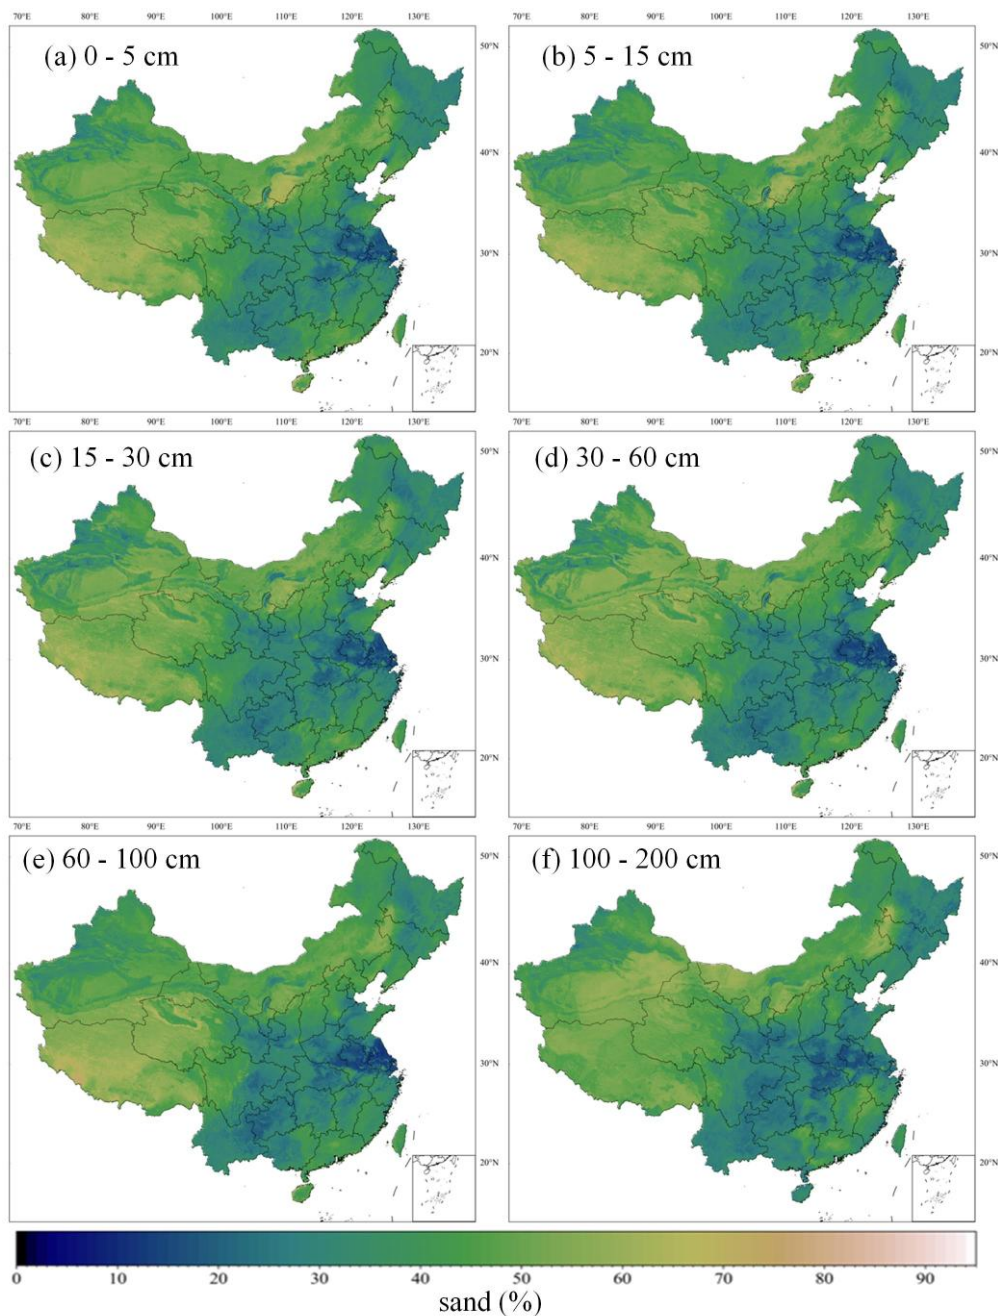

20 **Figure S5.** The predicted maps of sand content at multiple depths (%). (a) 0-5 cm; (b) 5-15 cm; (c) 15-30 cm; (d) 30-60 cm; (e) 60-100 cm and (f) 100-200 cm depth interval.

### S3.2 Accuracy assessment

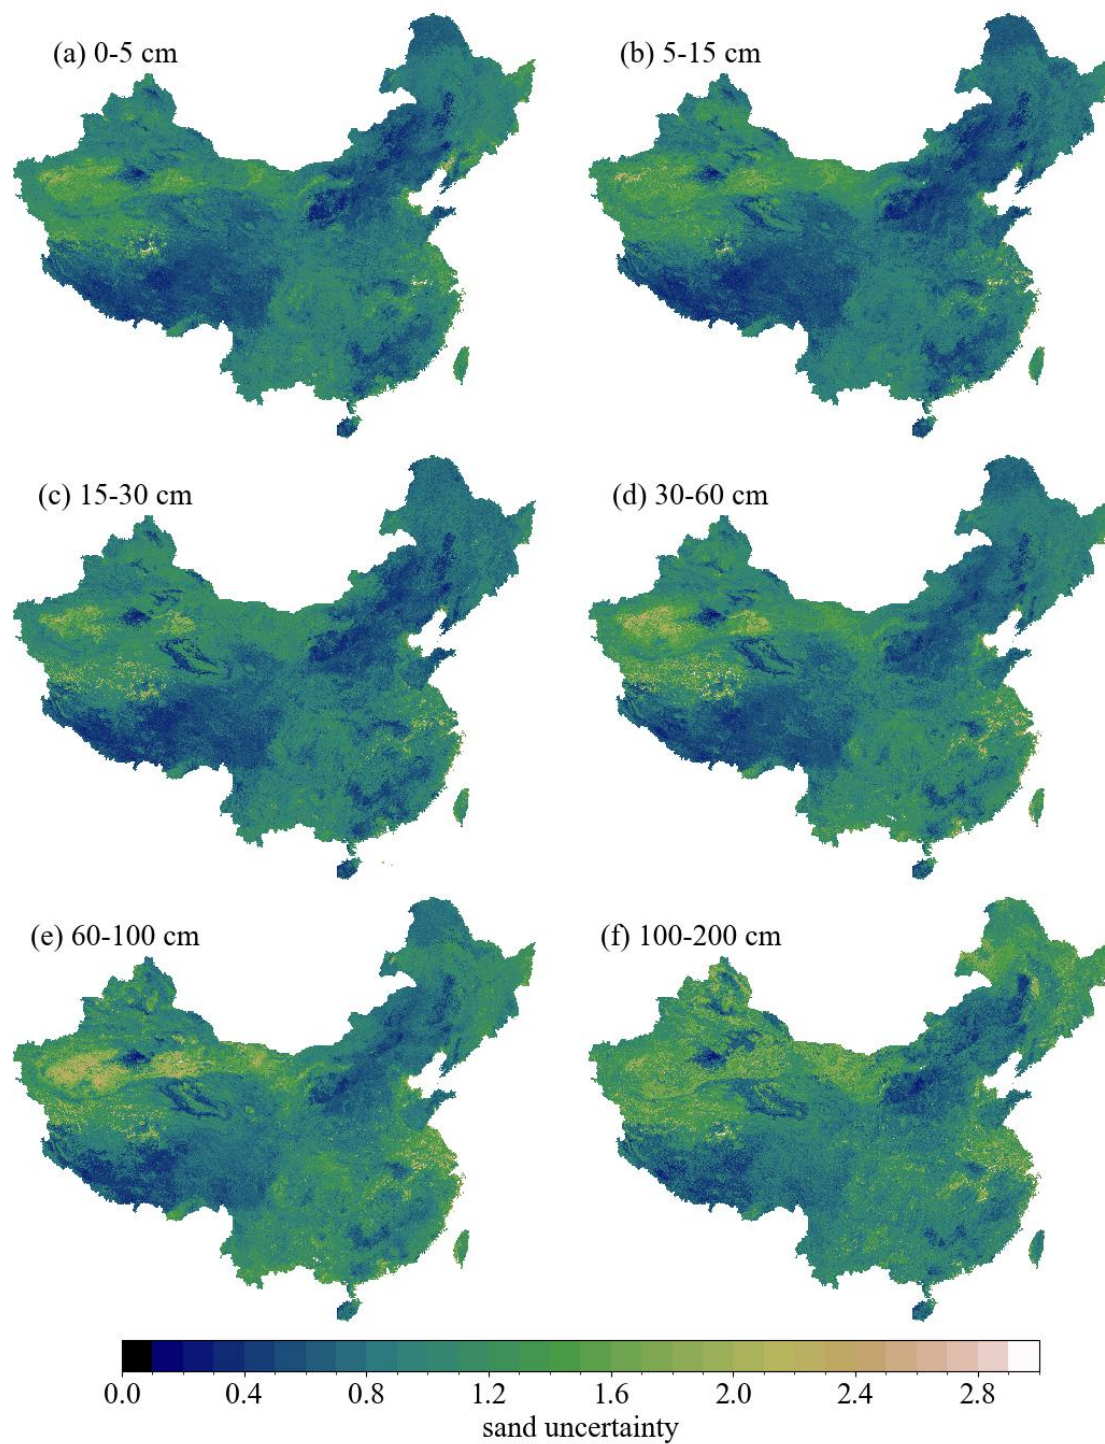

**Figure S6.** The maps of uncertainty of sand content predictions at the six depth intervals.

### S3.3 Variable importance

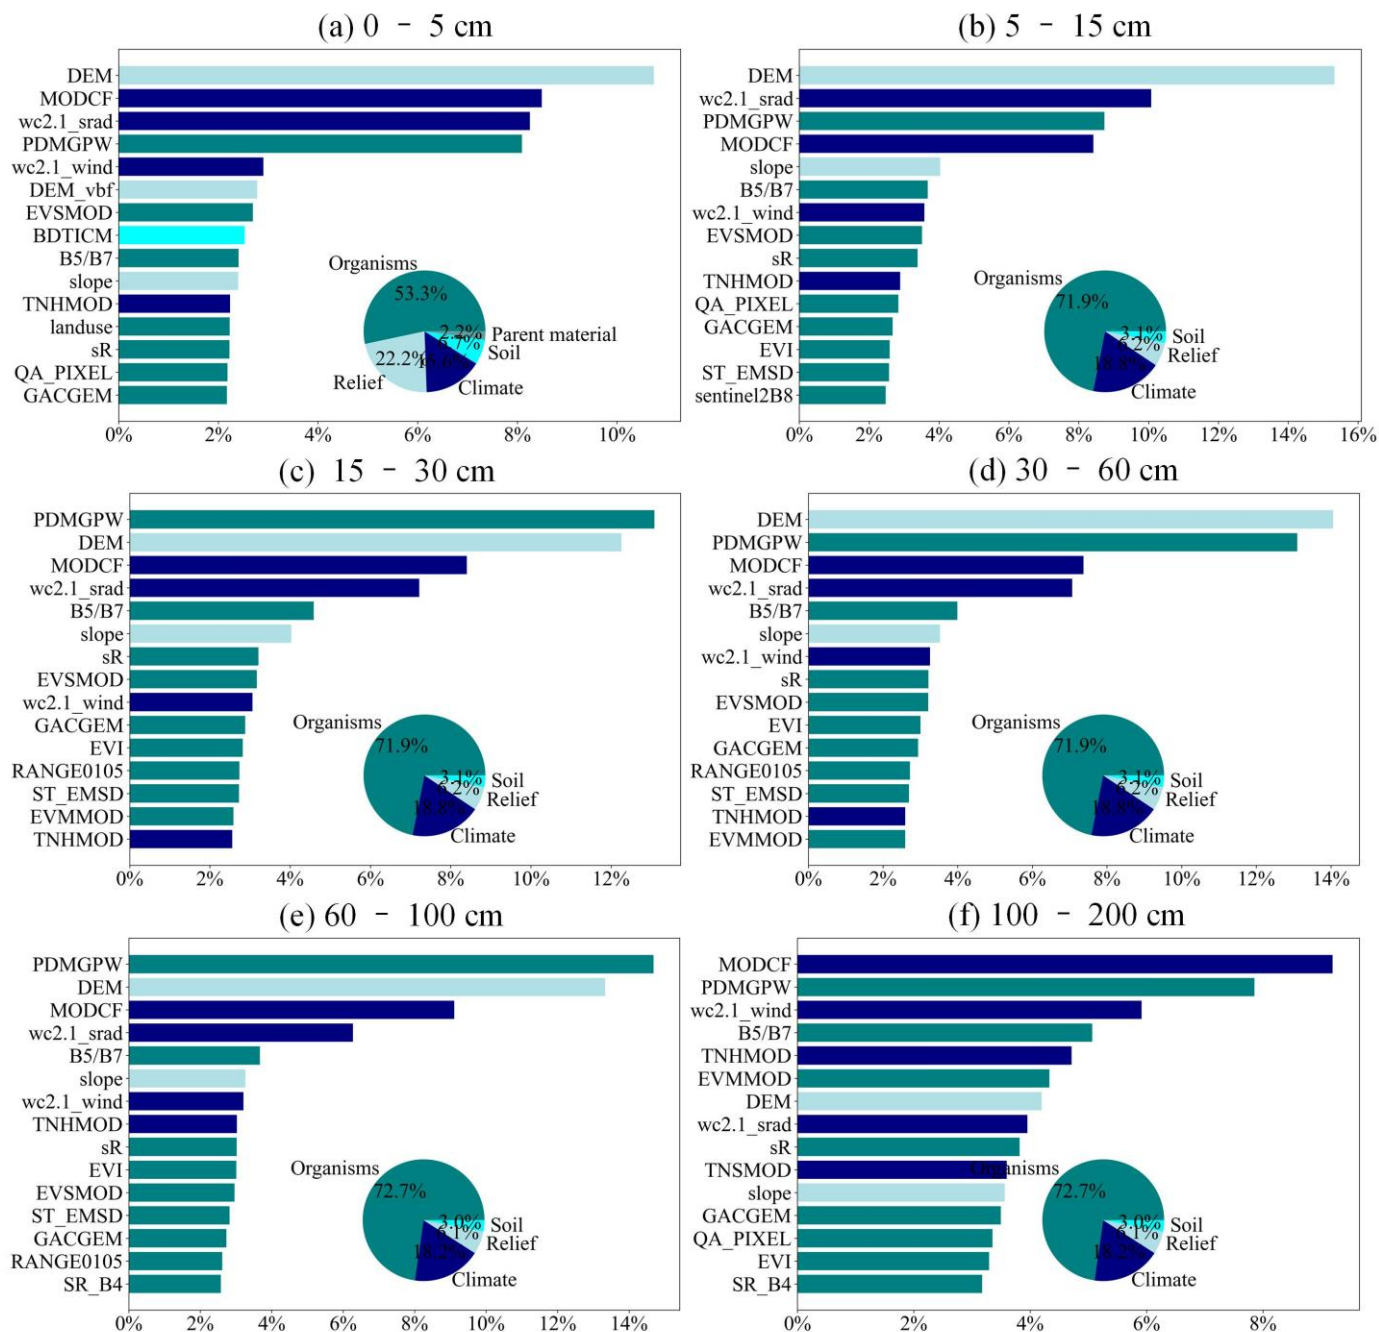

**Figure S7.** Relative importance of the top 15 predictors for the Quantile Regression Forest model in the spatial predictions of sand at the six depth intervals. See Table S6 for abbreviations of the environmental covariates.

## S4 Silt

### S4.1 Prediction maps

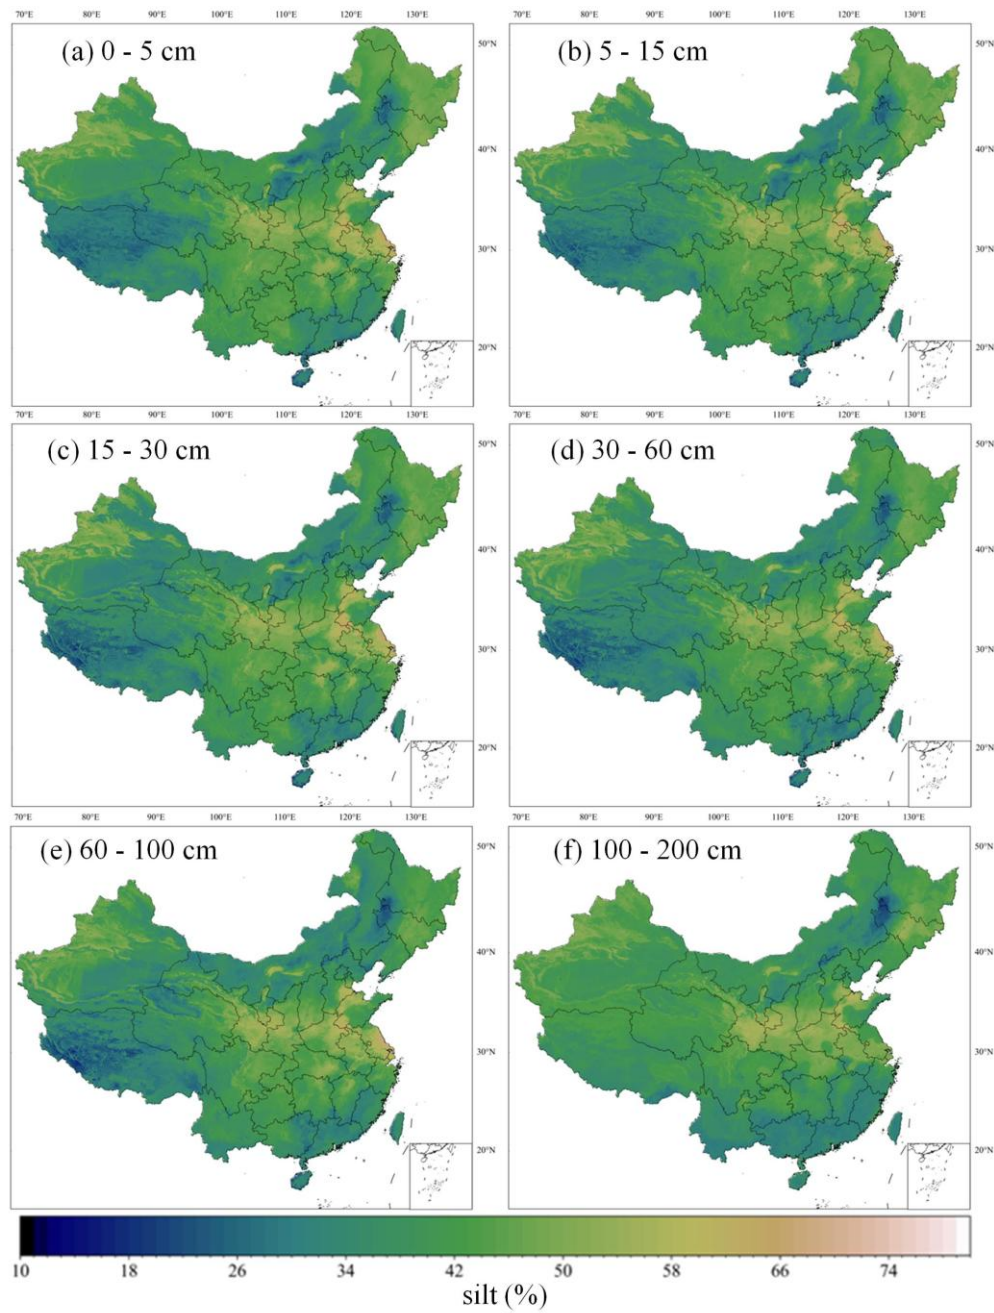

30

**Figure S8.** The predicted maps of silt content at multiple depths (%). (a) 0-5 cm; (b) 5-15 cm; (c) 15-30 cm; (d) 30-60 cm; (e) 60-100 cm and (f) 100-200 cm depth interval.

## S4.2 Accuracy assessment

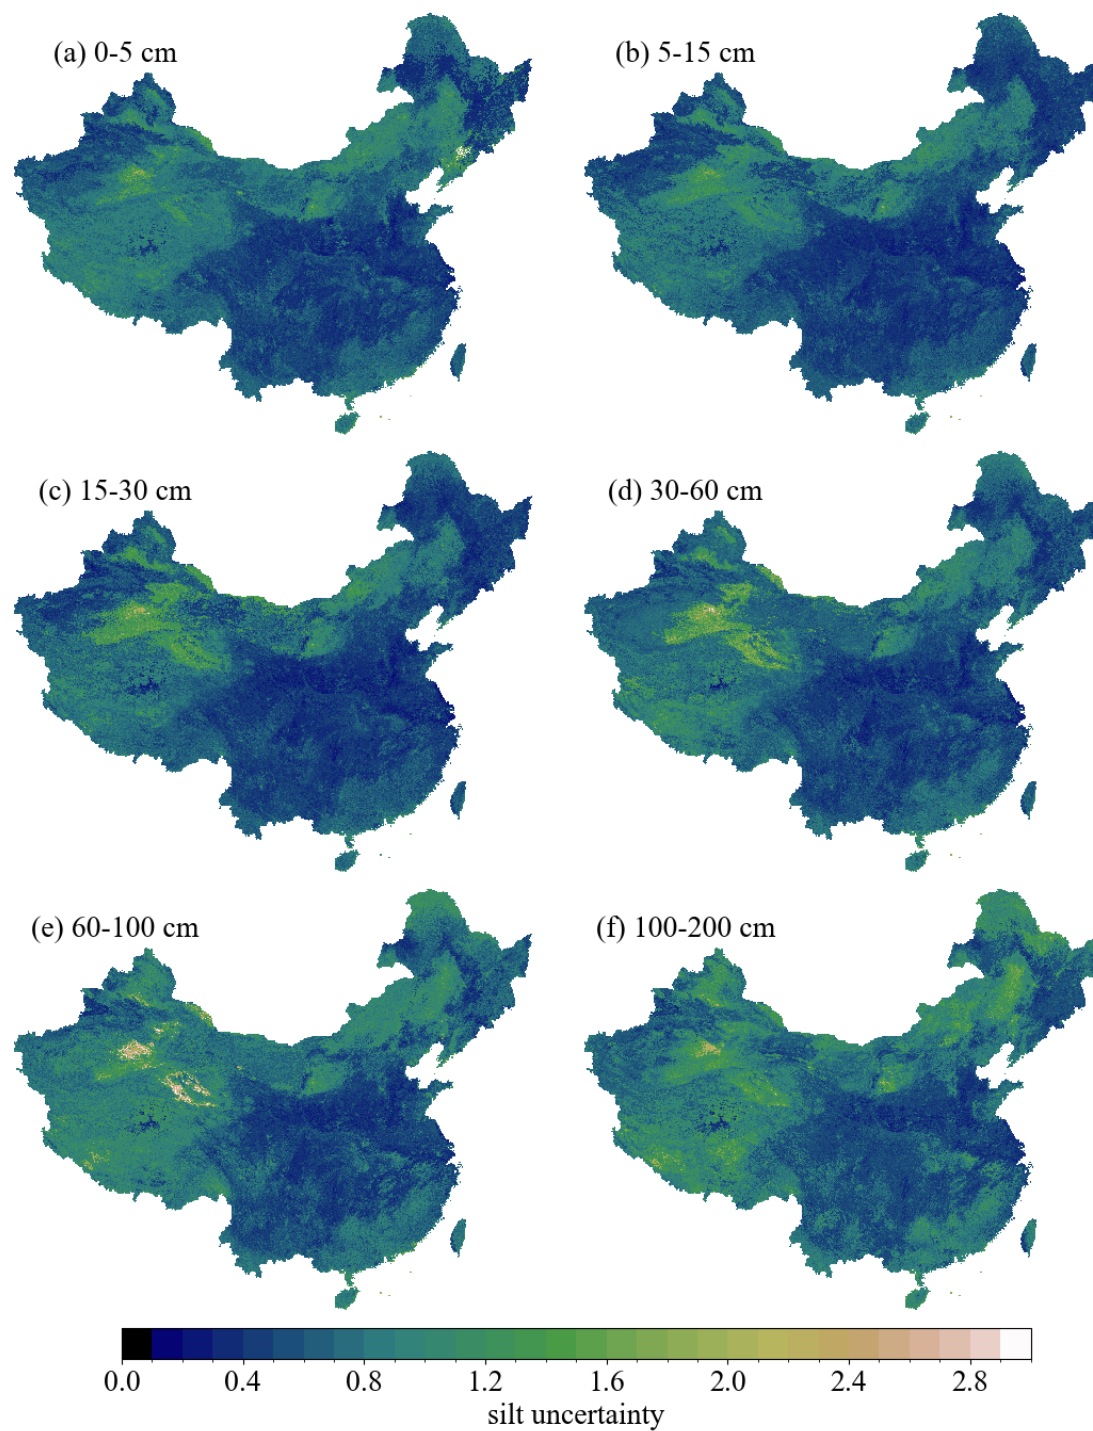

35 **Figure S9.** The maps of uncertainty of silt content predictions at the six depth intervals.

### S4.3 Variable importance

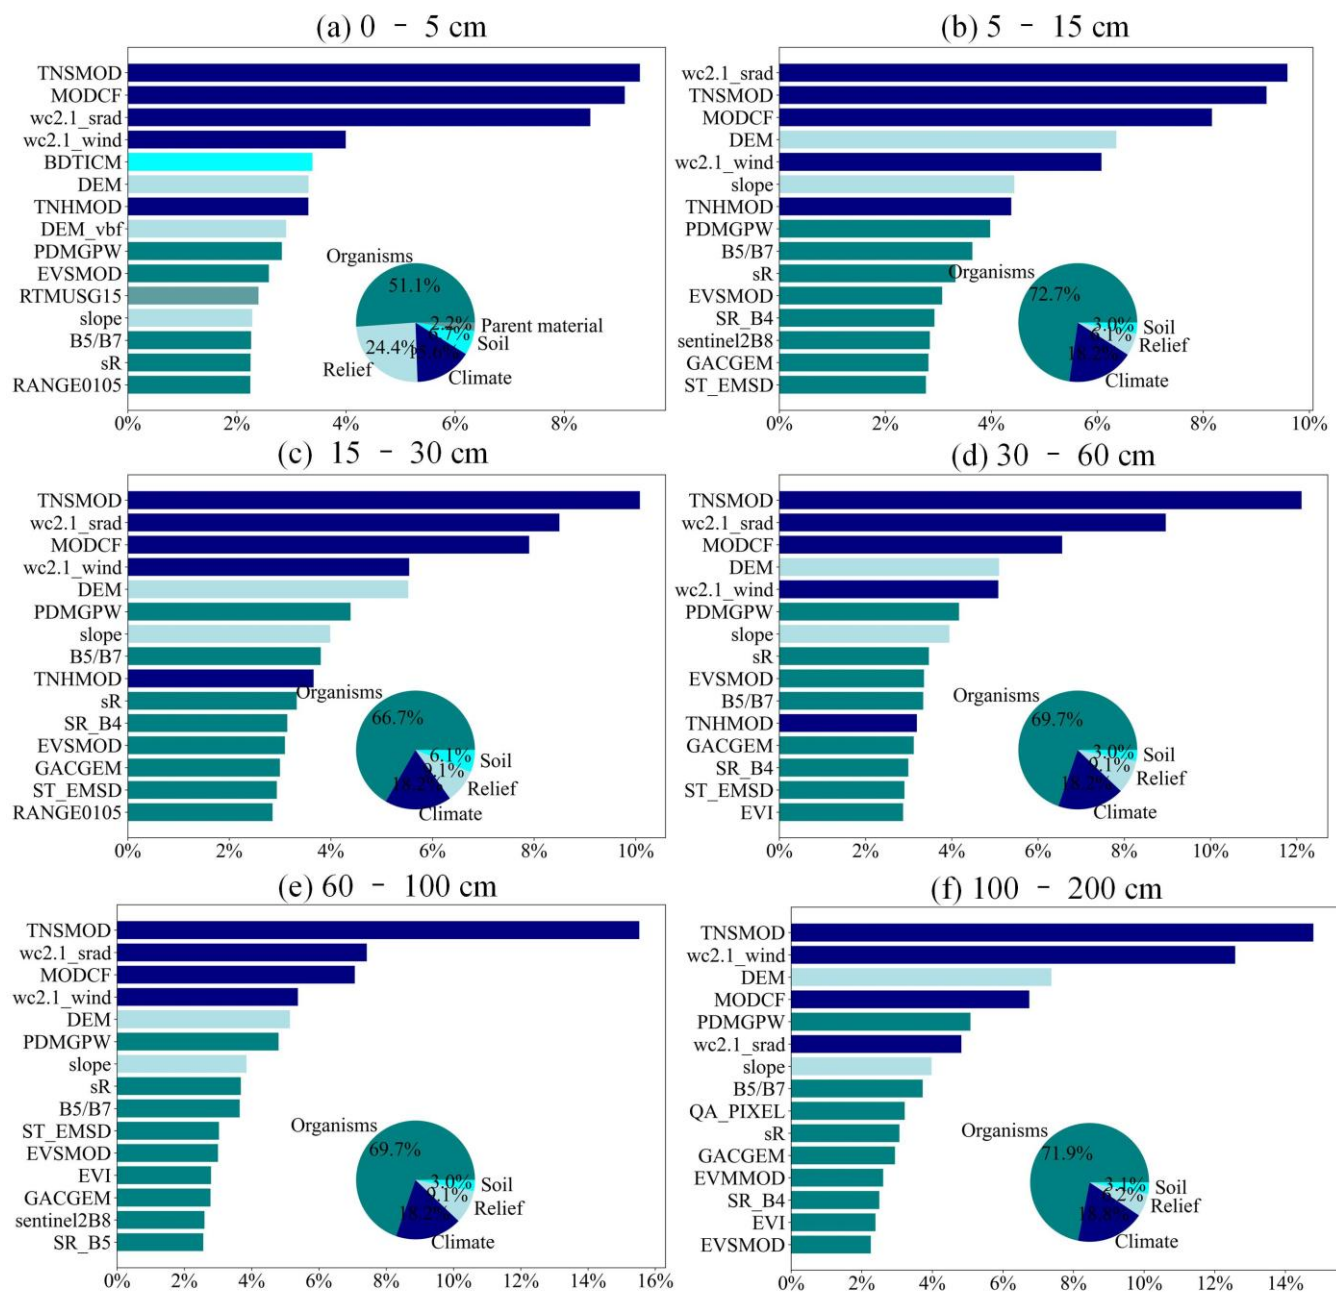

**Figure S10.** Relative importance of the top 15 predictors for the Quantile Regression Forest model in the spatial predictions of silt at the six depth intervals. See Table S6 for abbreviations of the environmental covariates.

## S5.1 Prediction maps

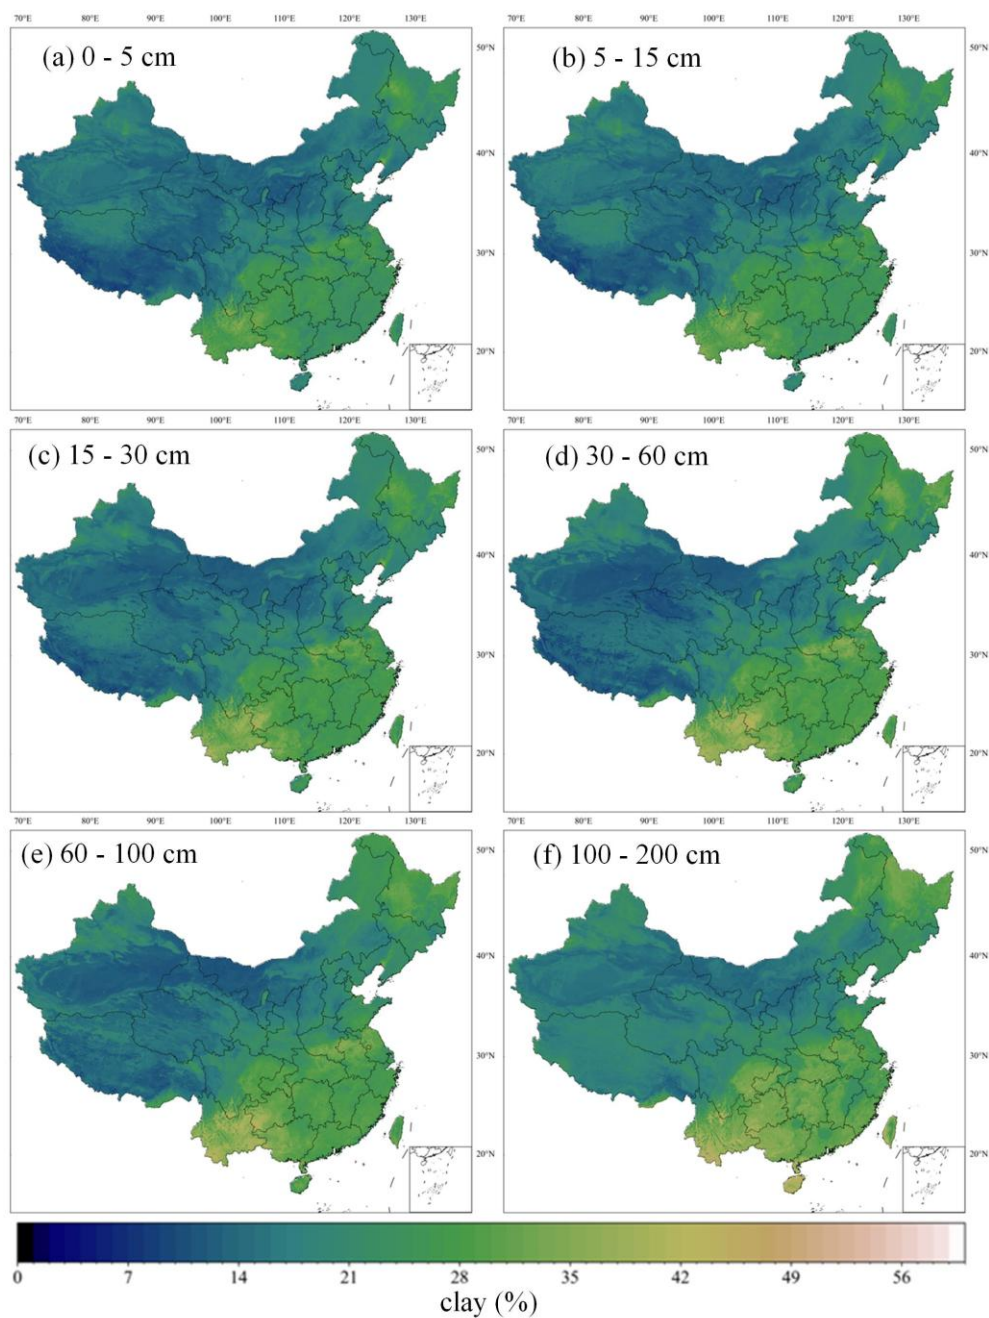

**Figure S11.** The predicted maps of clay content at multiple depths (%). (a) 0-5 cm; (b) 5-15 cm; (c) 15-30 cm; (d) 30-60 cm; (e) 60-100 cm and (f) 100-200 cm depth interval.



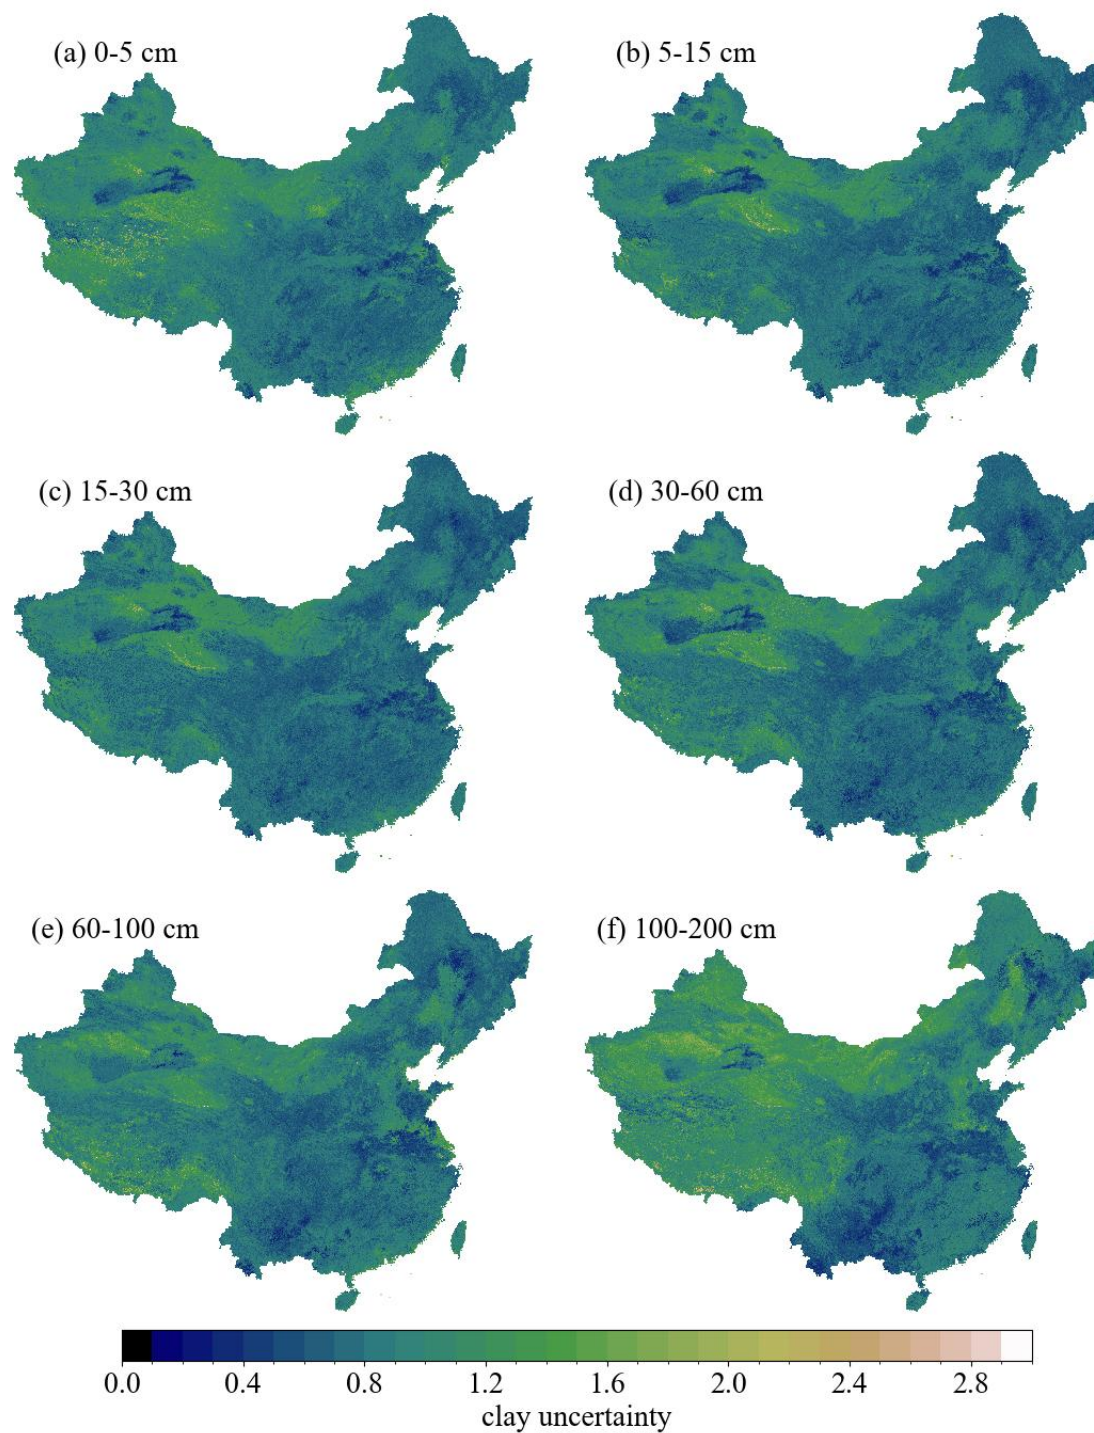

**Figure S12.** The maps of uncertainty of clay content predictions at the six depth intervals.

### S5.3 Variable importance

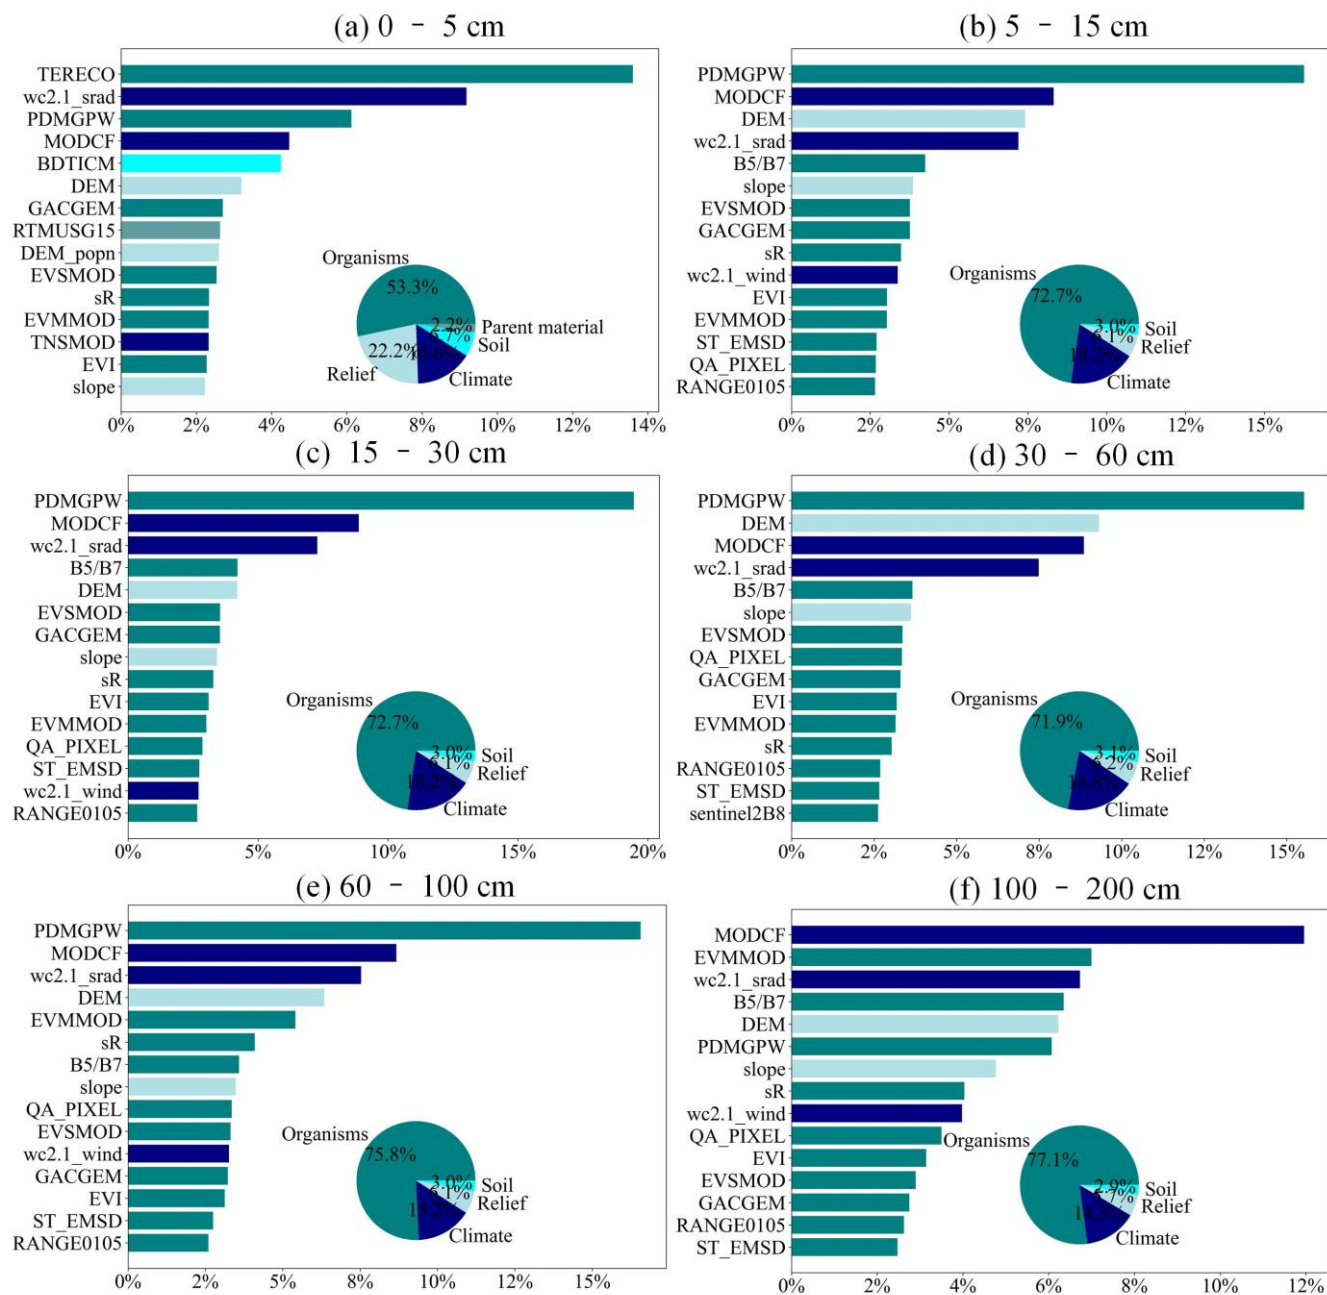

50 **Figure S13.** Relative importance of the top 15 predictors for the Quantile Regression Forest model in the spatial predictions of clay at the six depth intervals. See Table S6 for abbreviations of the environmental covariates.

## S6 Rock fragment (gravel)

### S6.1 Prediction maps

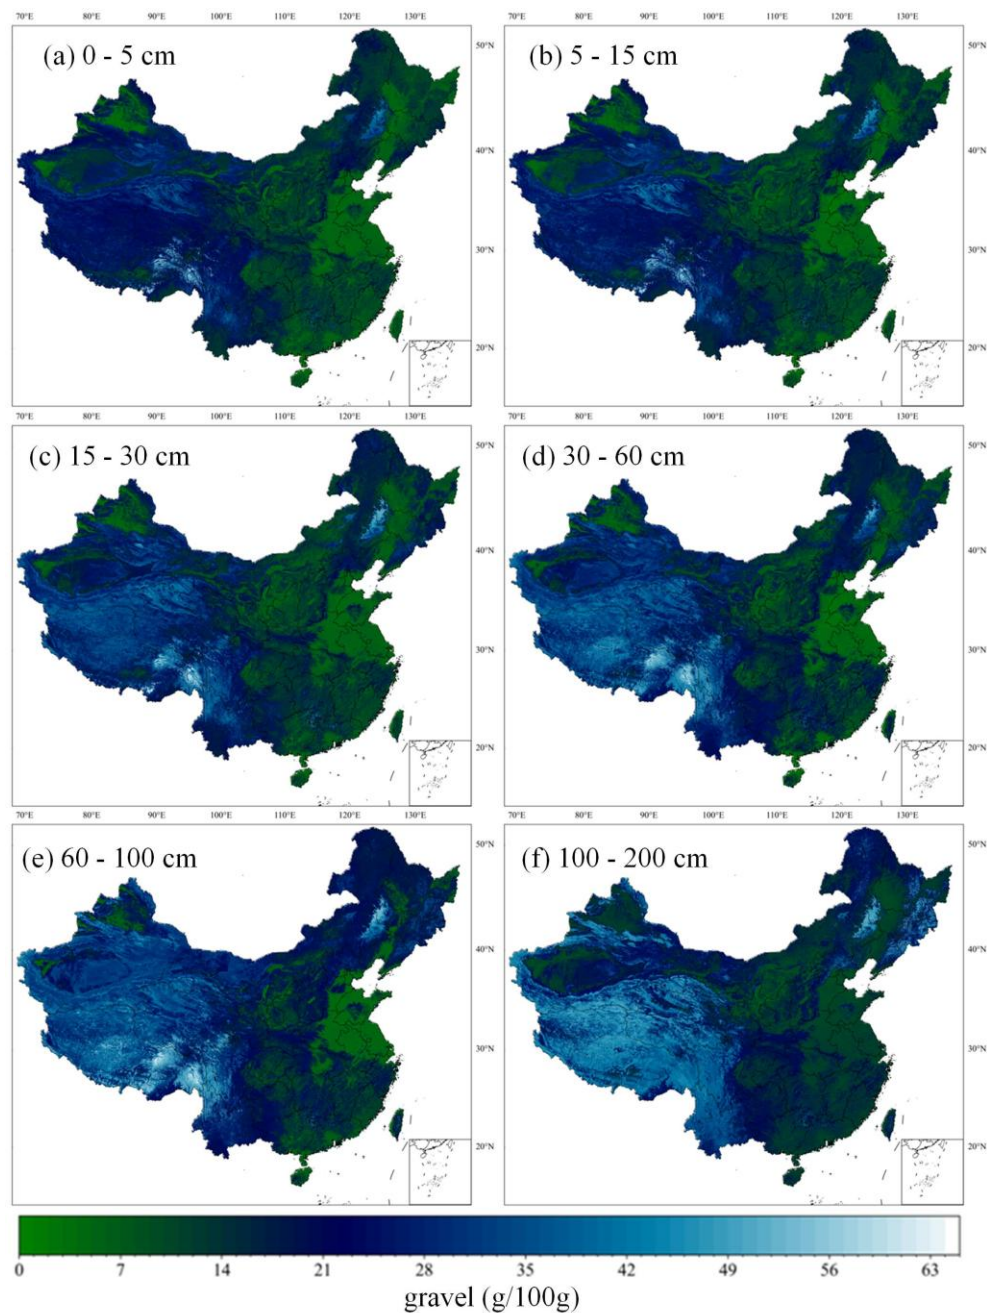

55 **Figure S14.** The predicted maps of Rock fragment (gravel) content at multiple depths (g/100g). (a) 0-5 cm; (b) 5-15 cm; (c) 15-30 cm; (d) 30-60 cm; (e) 60-100 cm and (f) 100-200 cm depth interval.

## S6.2 Accuracy assessment

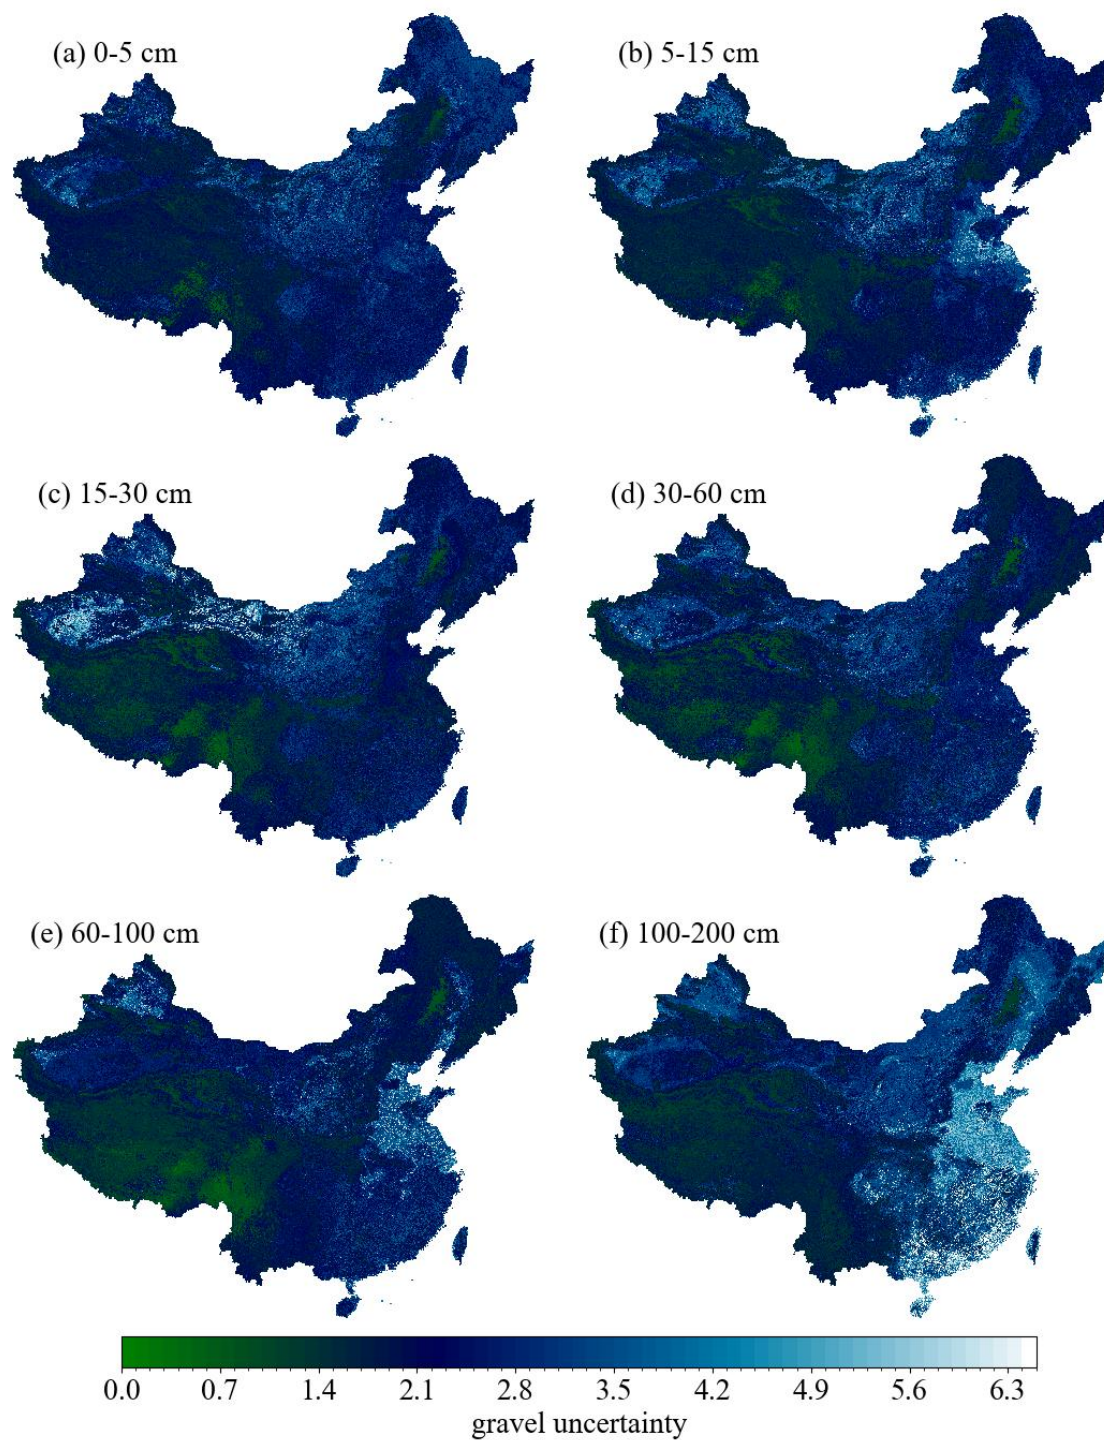

**Figure S15.** The maps of uncertainty of rock fragment (gravel) predictions at the six depth intervals.

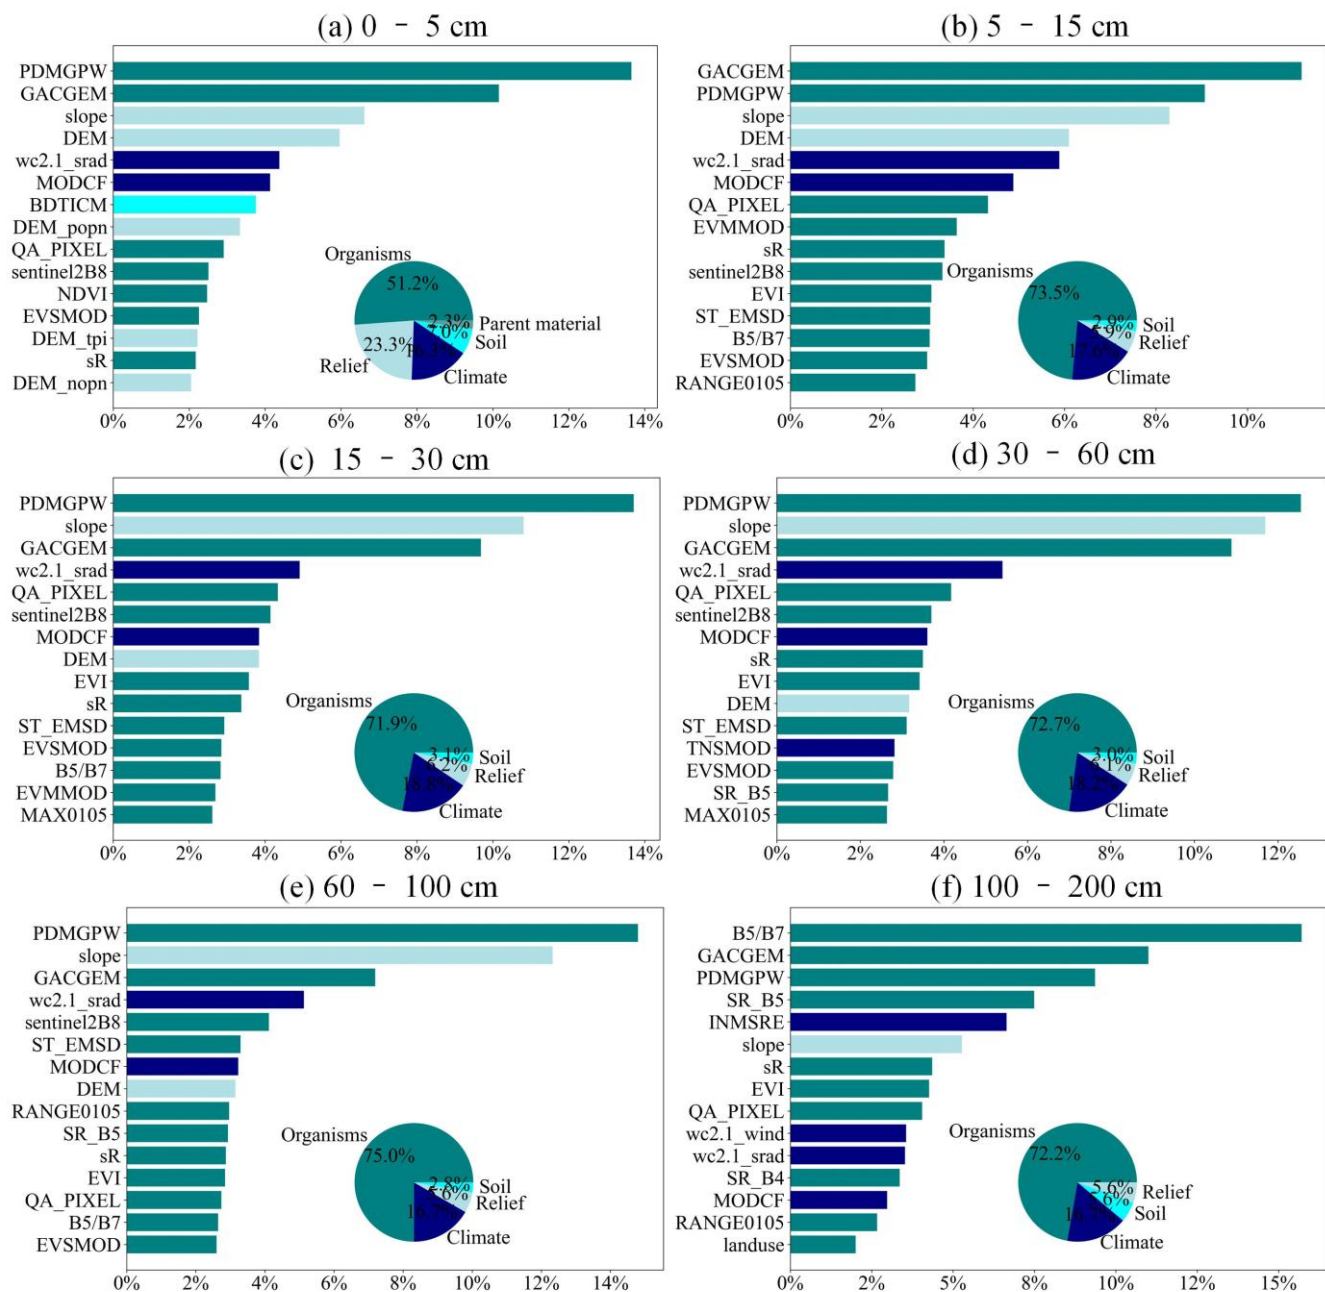

**Figure S16.** Relative importance of the top 15 predictors for the Quantile Regression Forest model in the spatial predictions of rock fragment (gravel) at the six depth intervals. See Table S6 for abbreviations of the environmental covariates.

## S7 Porosity

### 65 S7.1 Prediction maps

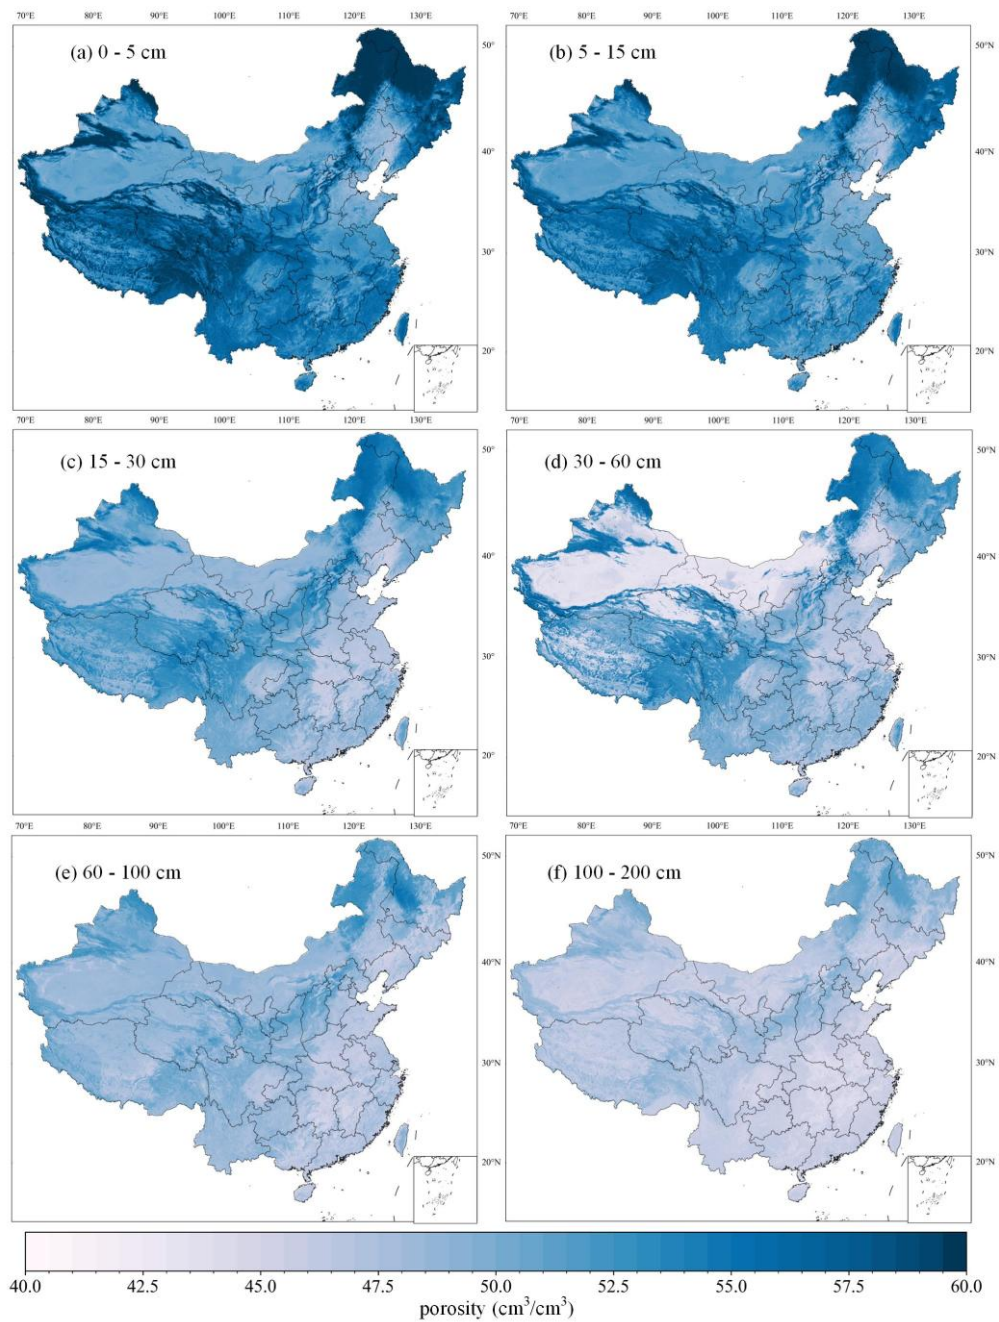

**Figure S17.** The predicted maps of porosity at multiple depths ( $\text{cm}^3/\text{cm}^3$ ). (a) 0-5 cm; (b) 5-15 cm; (c) 15-30 cm; (d) 30-60 cm; (e) 60-100 cm and (f) 100-200 cm depth interval.

## S7.2 Accuracy assessment

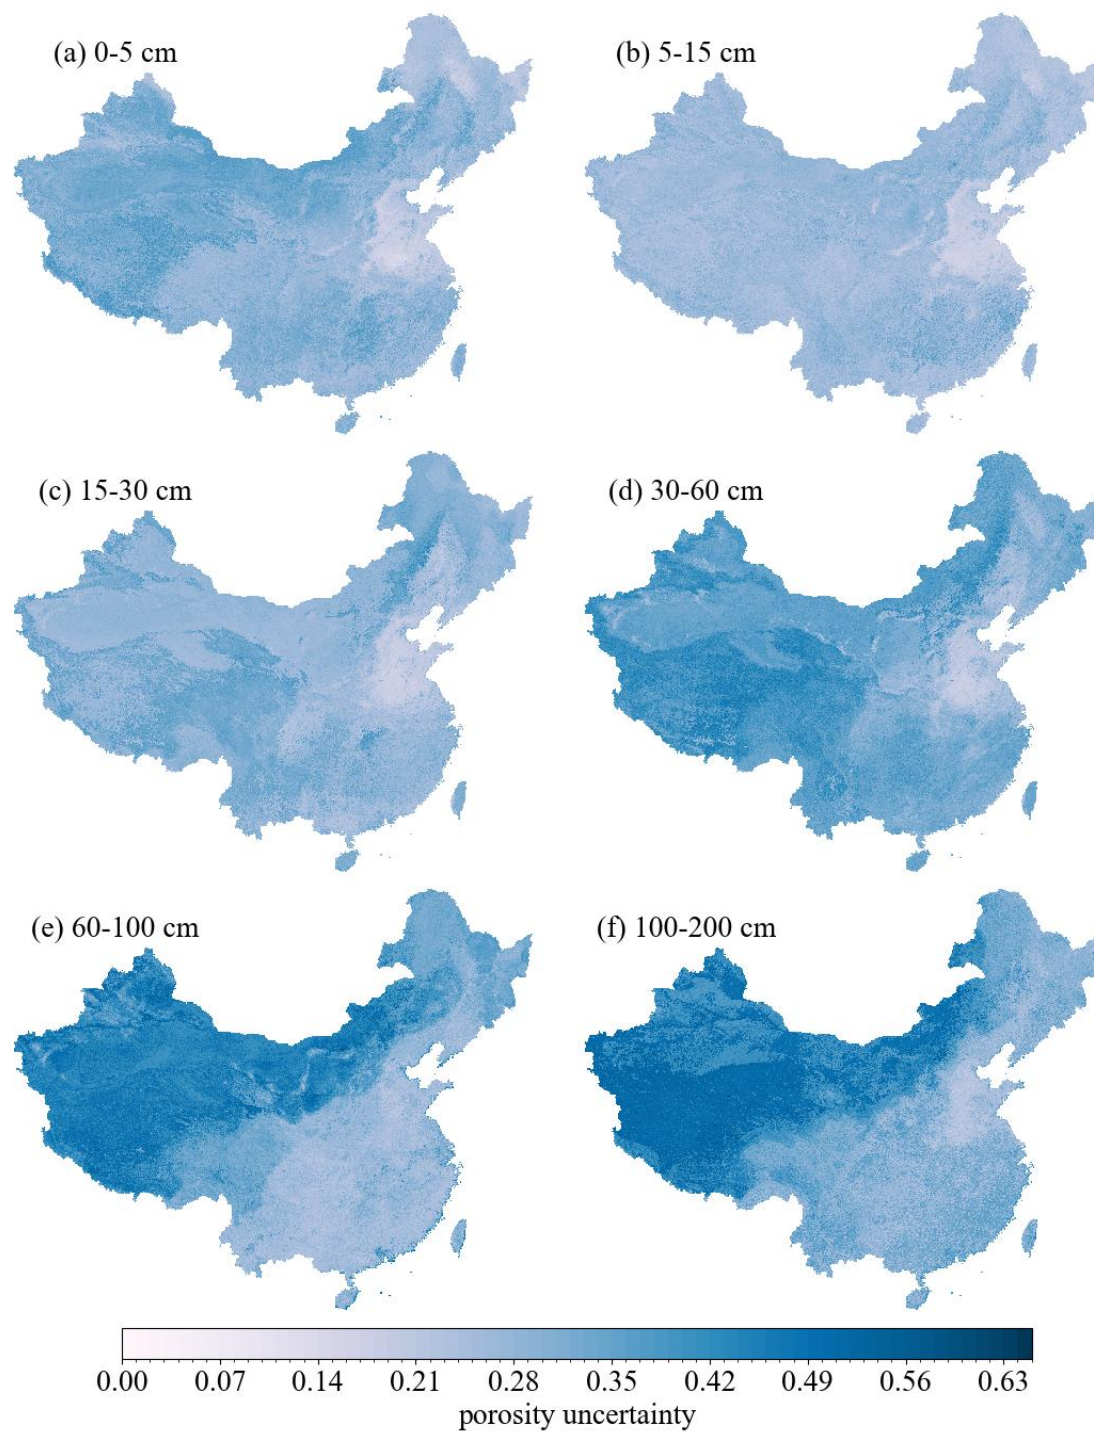

70

**Figure S18.** The maps of uncertainty of porosity predictions at the six depth intervals.

### S7.3 Variable importance

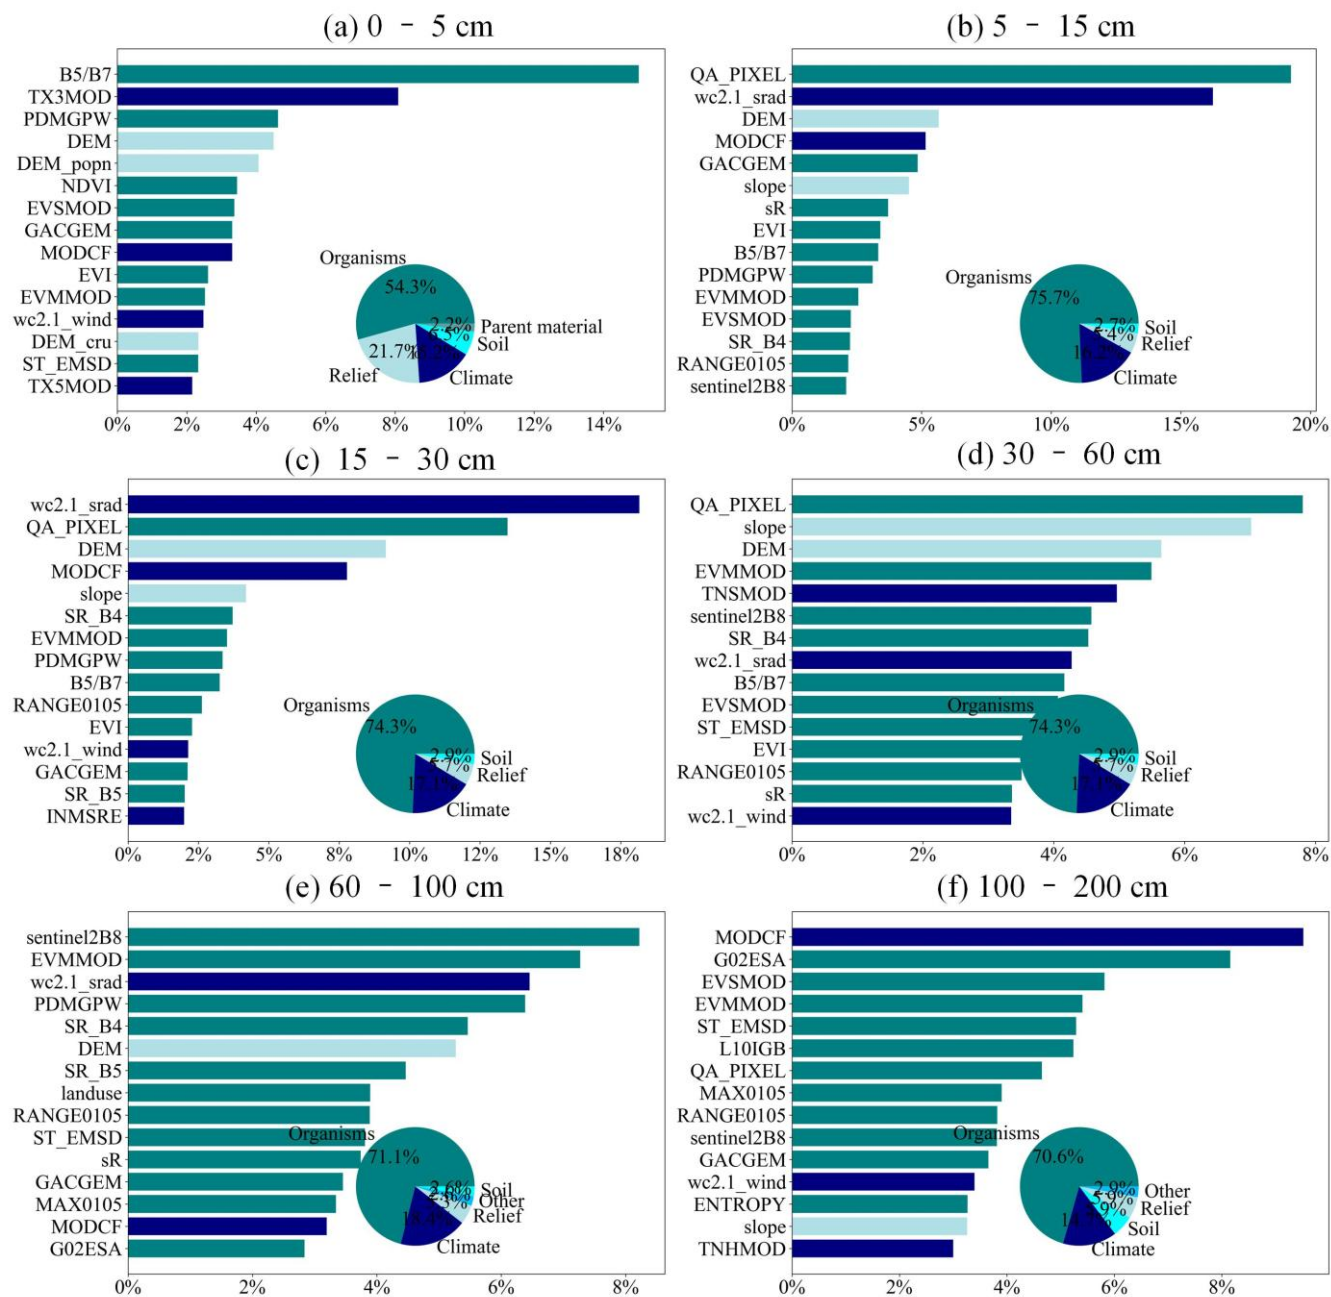

75 **Figure S19.** Relative importance of the top 15 predictors for the Quantile Regression Forest model in the spatial predictions of porosity at the six depth intervals. See Table S6 for abbreviations of the environmental covariates.



## S8 Red (R) of wet soil color

### S8.1 Prediction maps

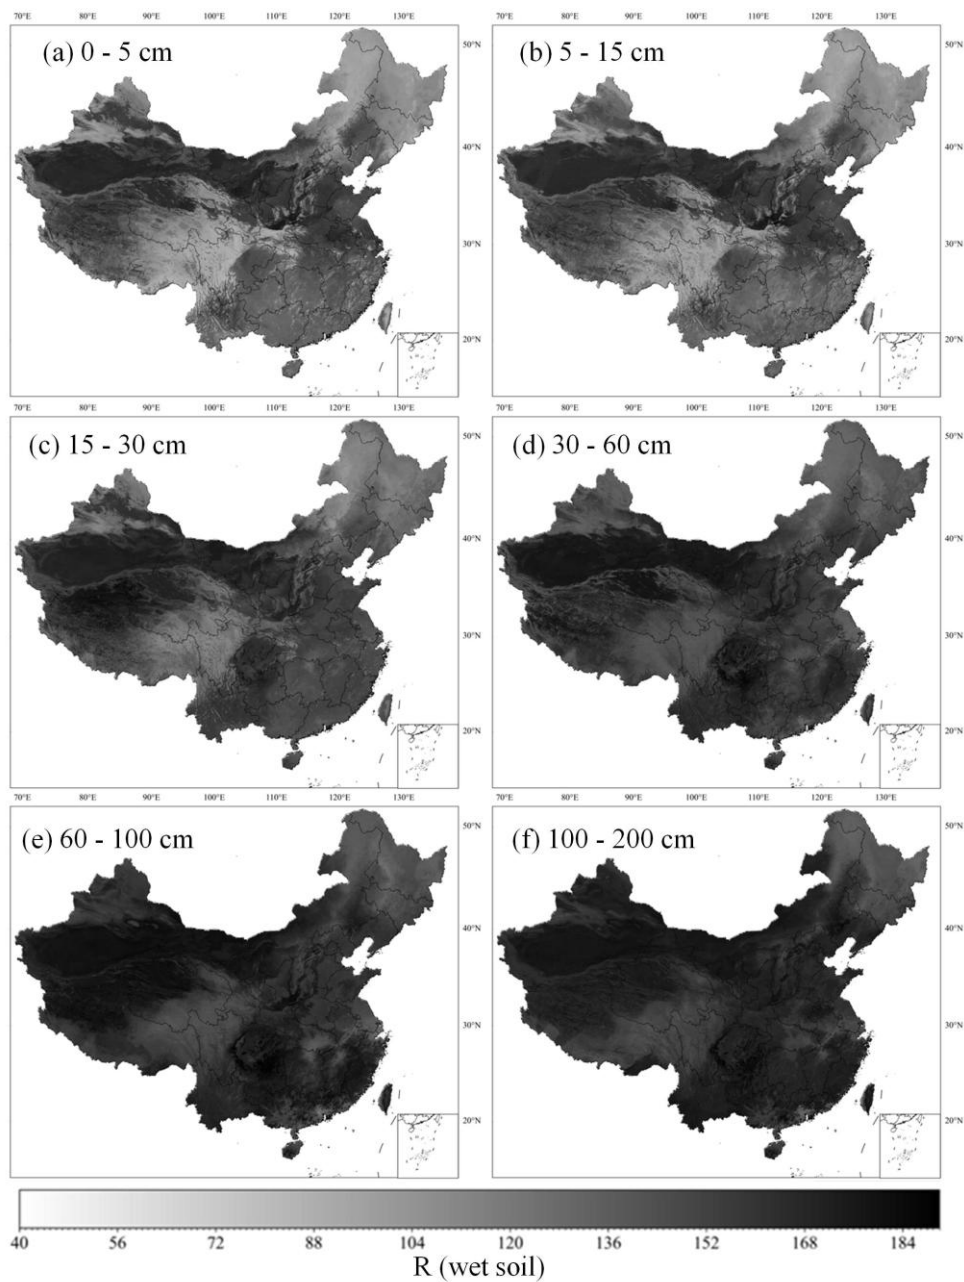

**Figure S20.** The predicted maps of the red (R) component of wet soil color at multiple depths. (a) 0-5 cm; (b) 5-15 cm; (c) 15-30 cm; (d) 30-60 cm; (e) 60-100 cm; and (f) 100-200 cm depth interval. The R component represents the red channel in the RGB soil color system.

## S8.2 Accuracy assessment

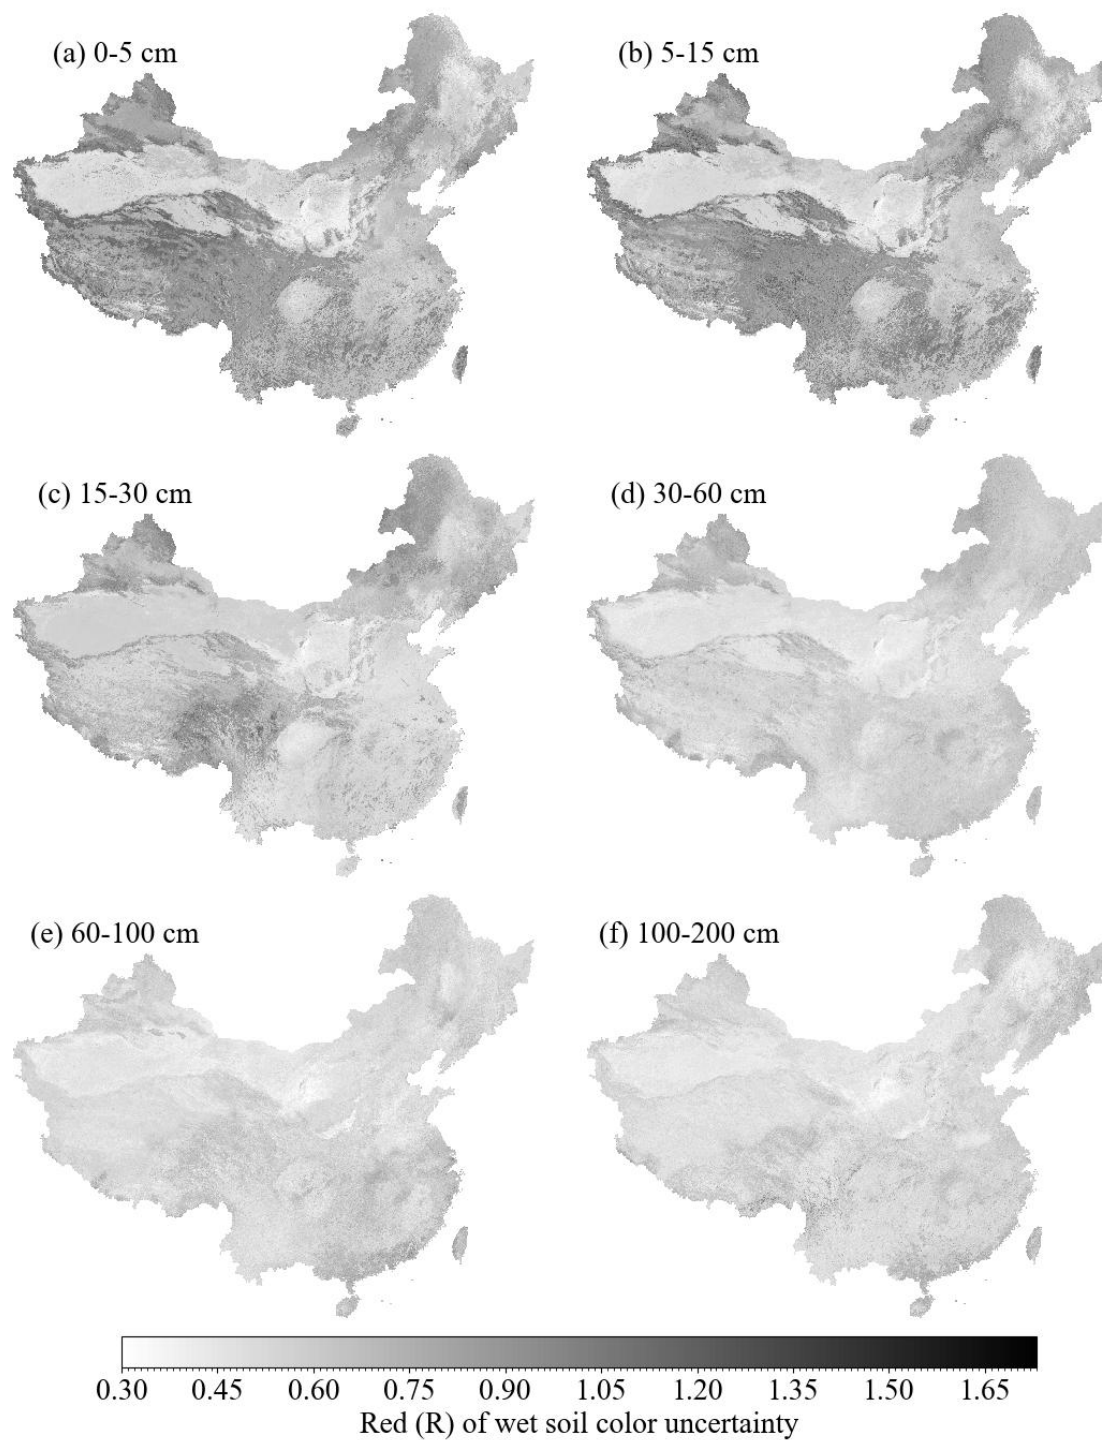

**Figure S21.** The maps of uncertainty of the red (R) component of wet soil color predictions at the six depth intervals.

### S8.3 Variable importance

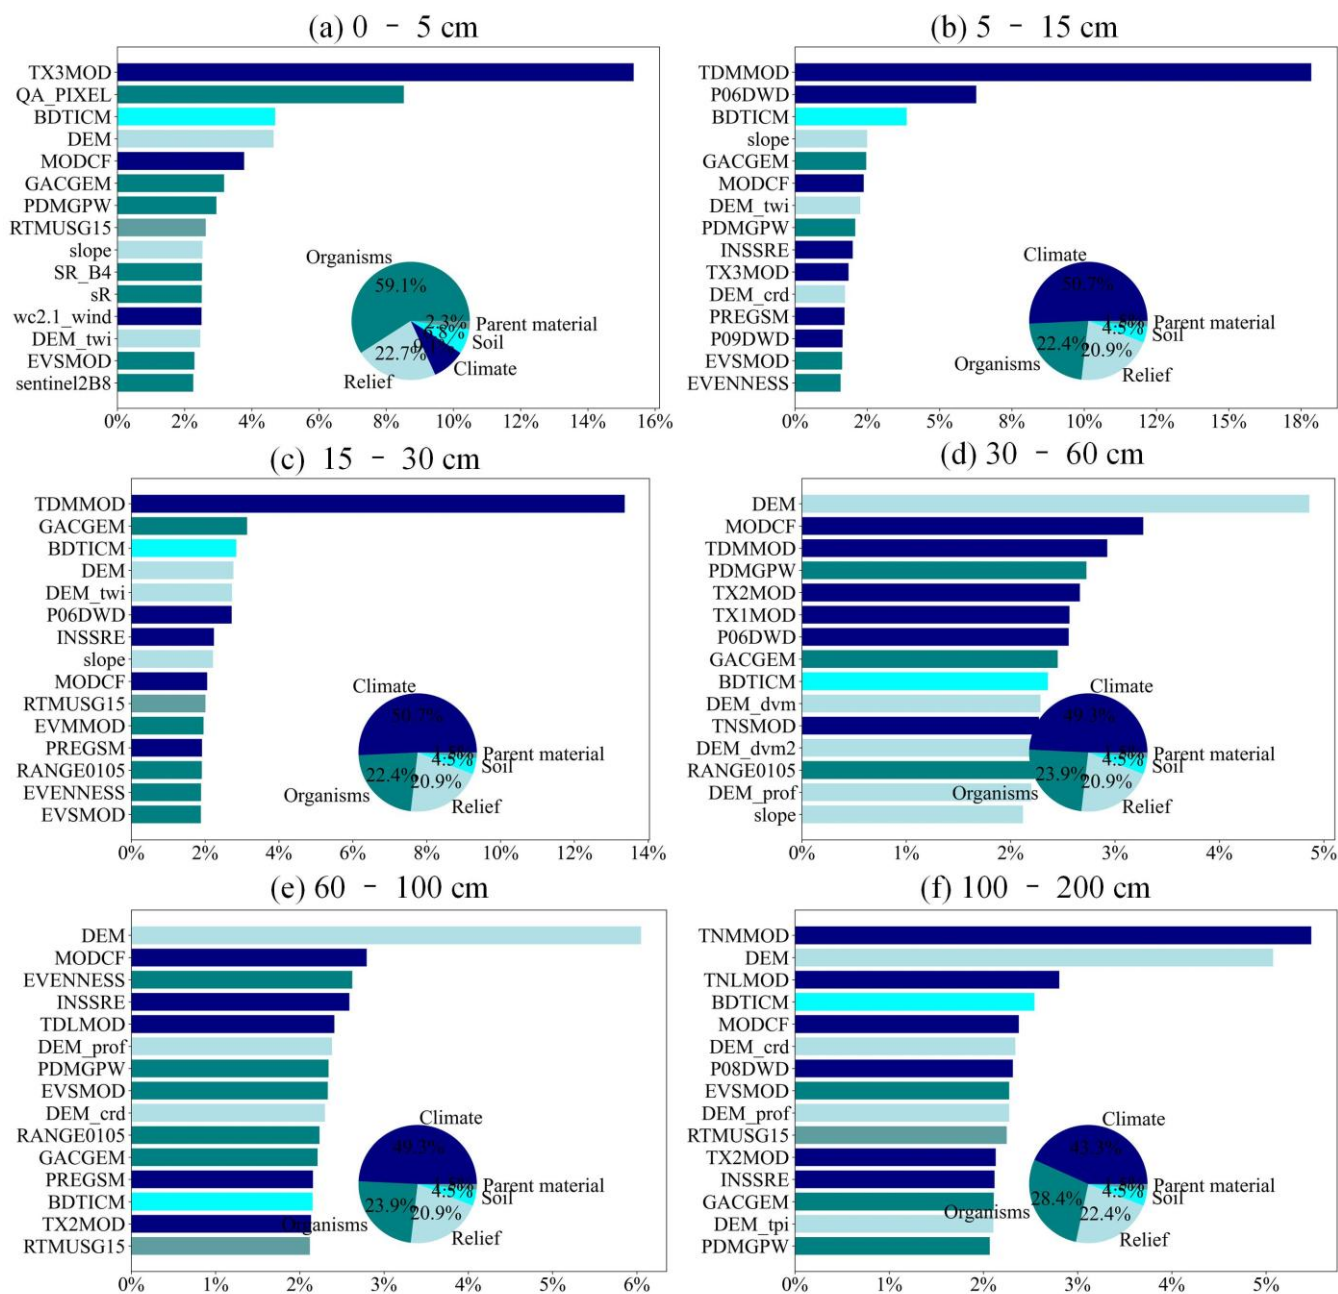

85

**Figure S22.** Relative importance of the top 15 predictors for the Quantile Regression Forest model in the spatial predictions of the red (R) component of wet soil color at the six depth intervals. See Table S6 for abbreviations of the environmental covariates.

## S9 Green (G) of wet soil color

### S9.1 Prediction maps

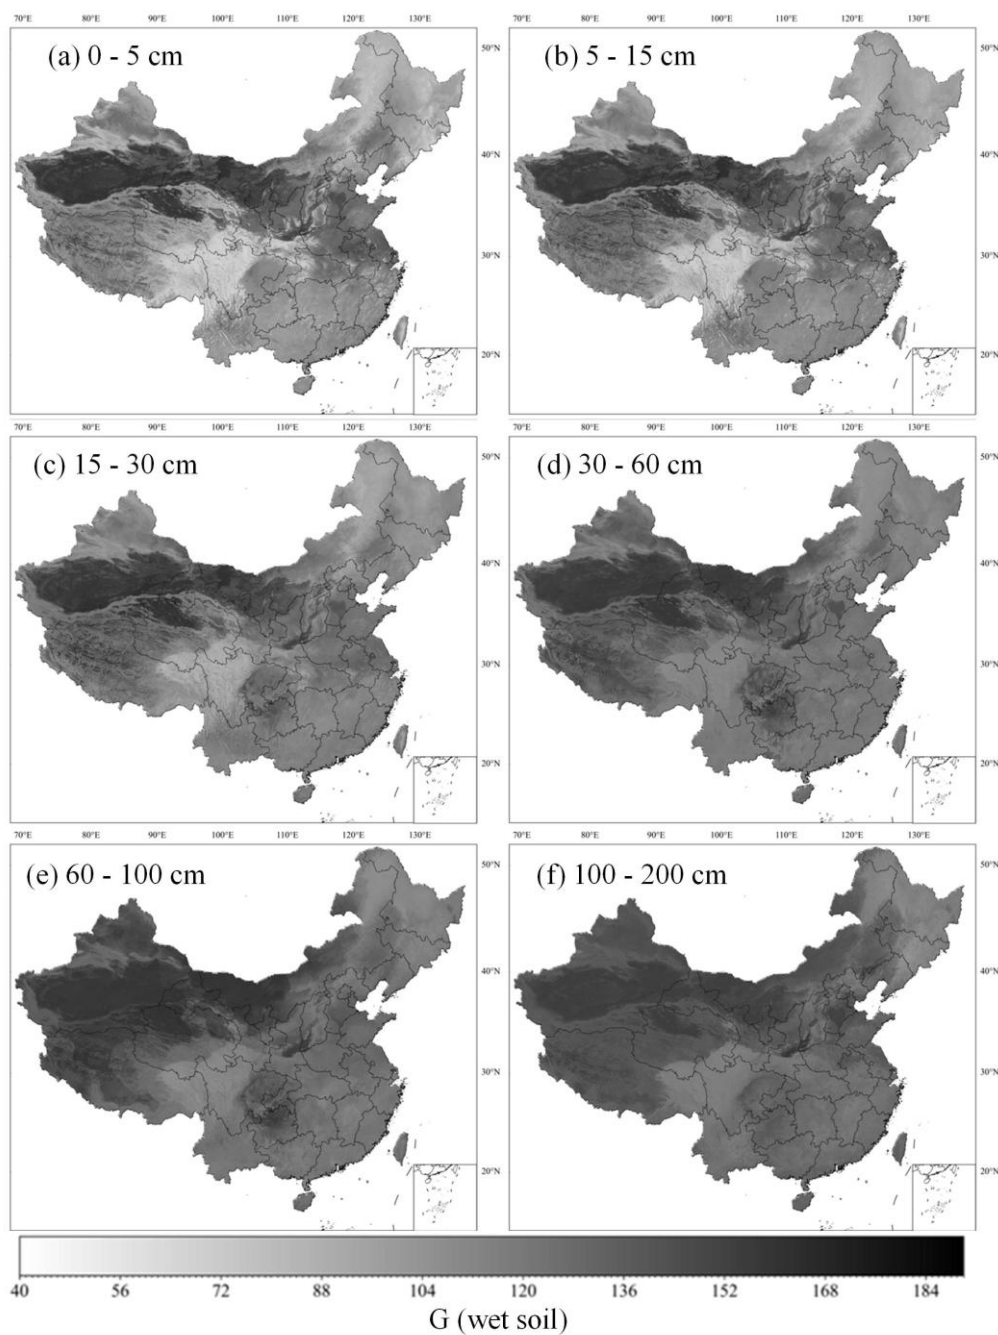

90

**Figure S23.** The predicted maps of the green (G) component of wet soil color at multiple depths. (a) 0-5 cm; (b) 5-15 cm; (c) 15-30 cm; (d) 30-60 cm; (e) 60-100 cm; and (f) 100-200 cm depth interval. The G component represents the green channel in the RGB soil color system.

## S9.2 Accuracy assessment

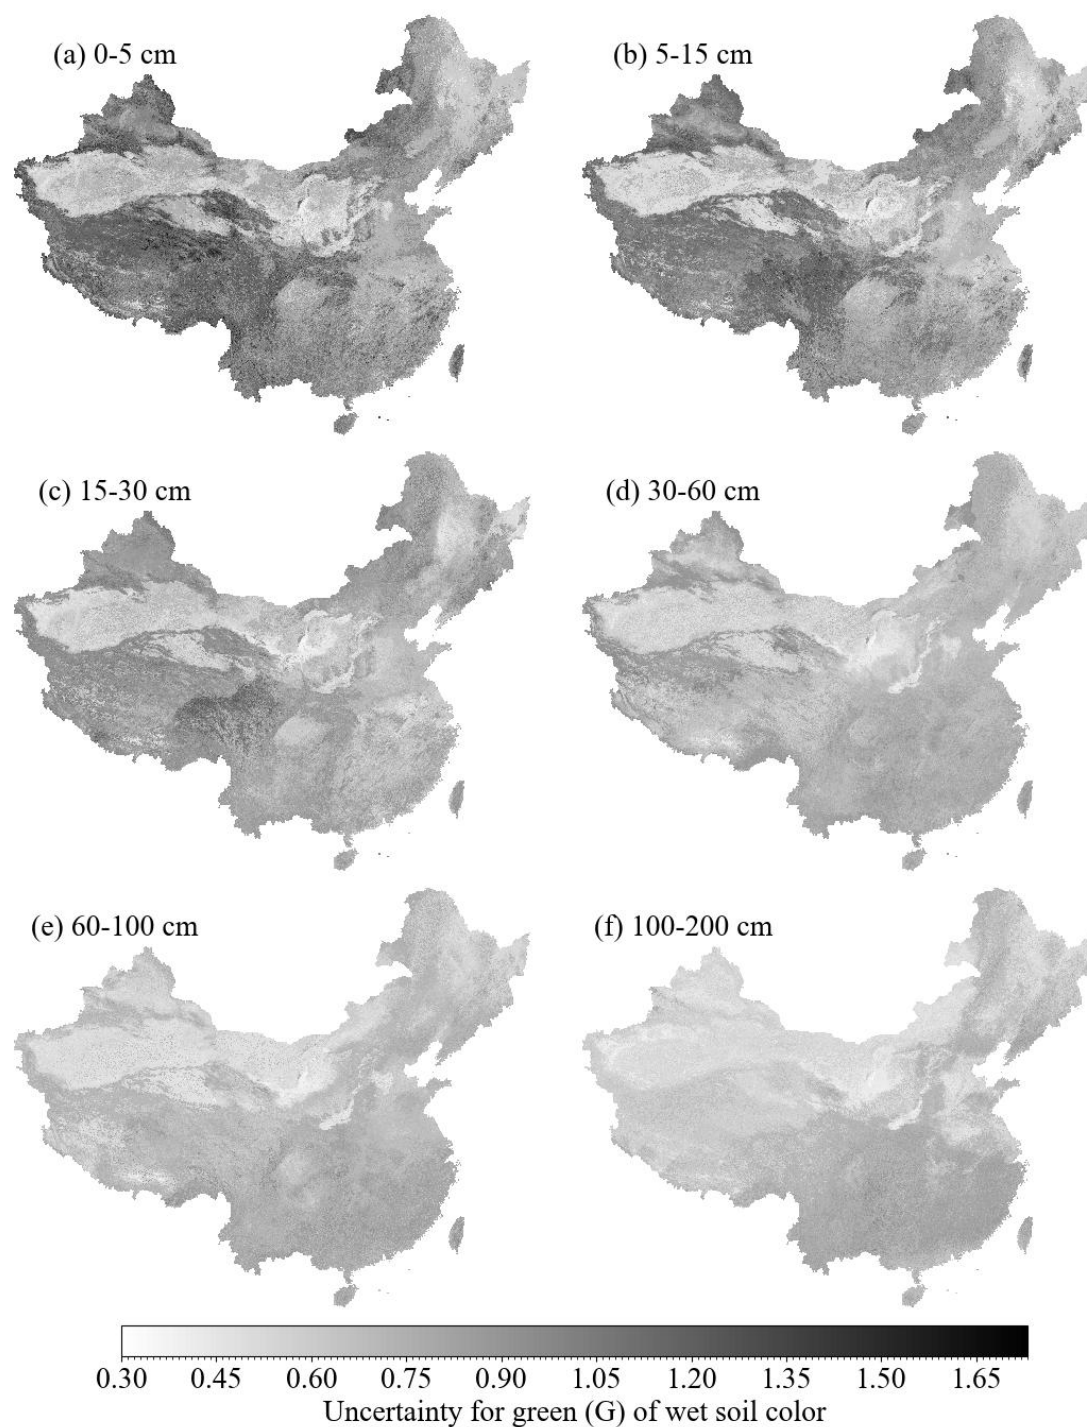

95 **Figure S24.** The maps of uncertainty of the green (G) component of wet soil color predictions at the six depth intervals.

### S9.3 Variable importance

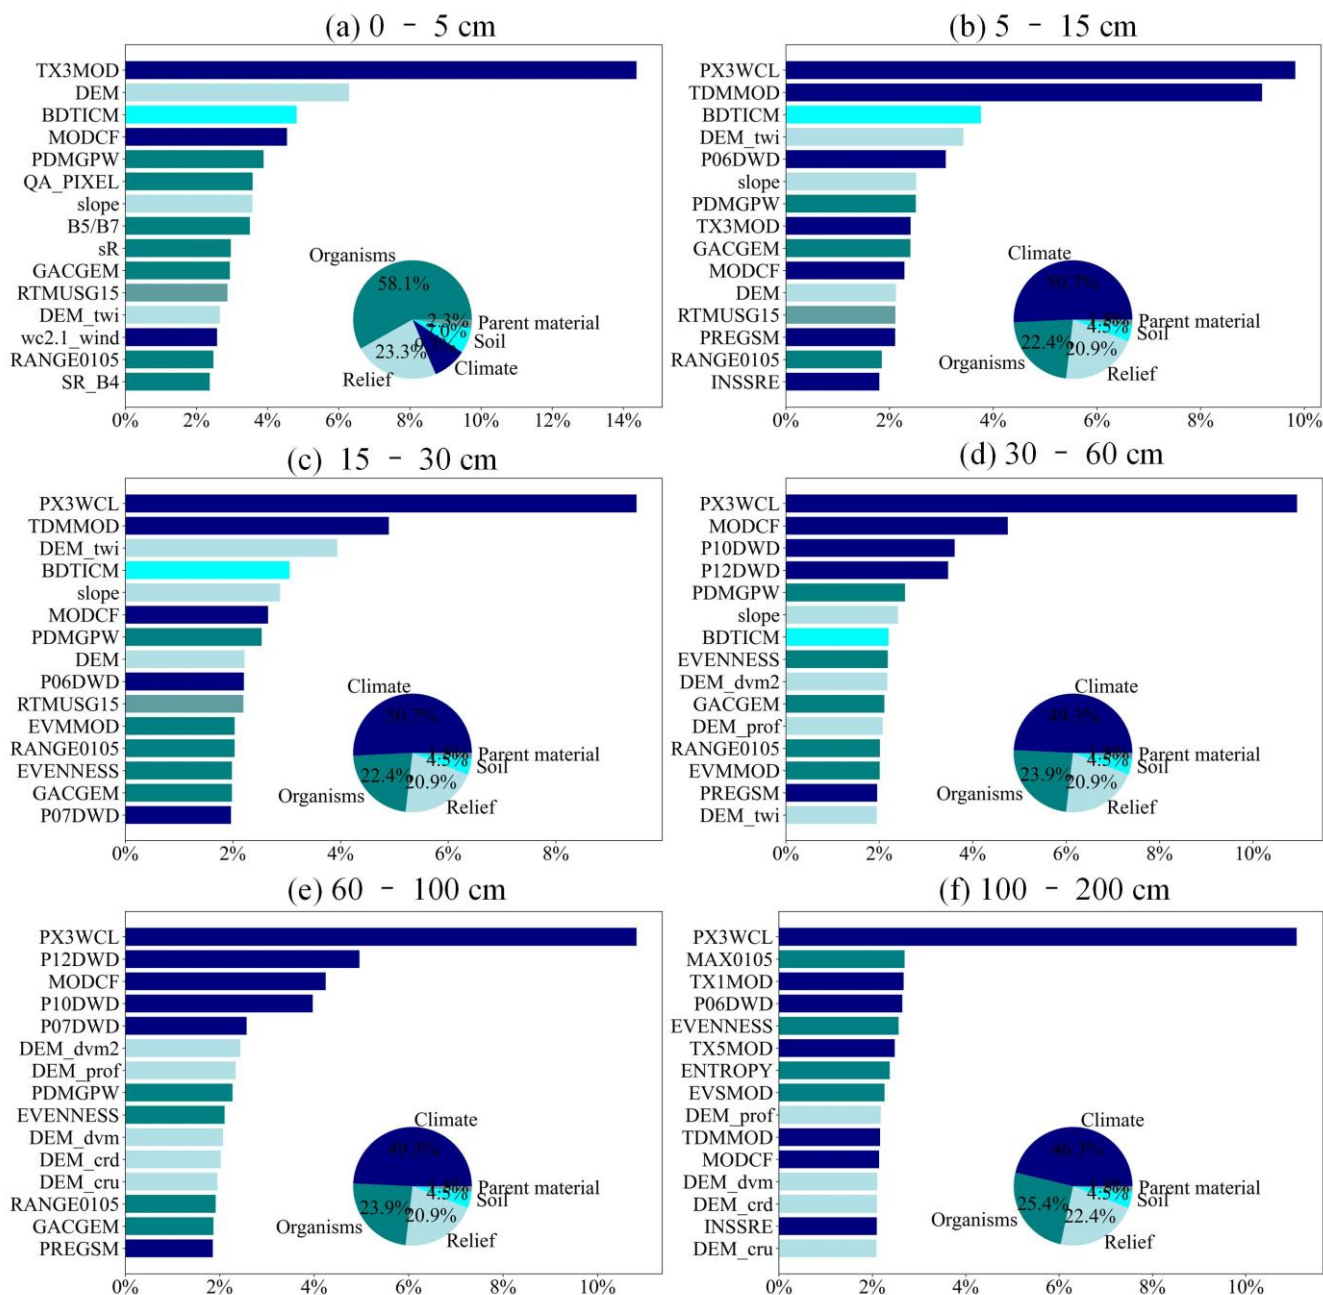

**Figure S25.** Relative importance of the top 15 predictors for the Quantile Regression Forest model in the spatial predictions of the green (G) component of wet soil color at the six depth intervals. See Table S6 for abbreviations of the environmental covariates.

## S10.1 Prediction maps

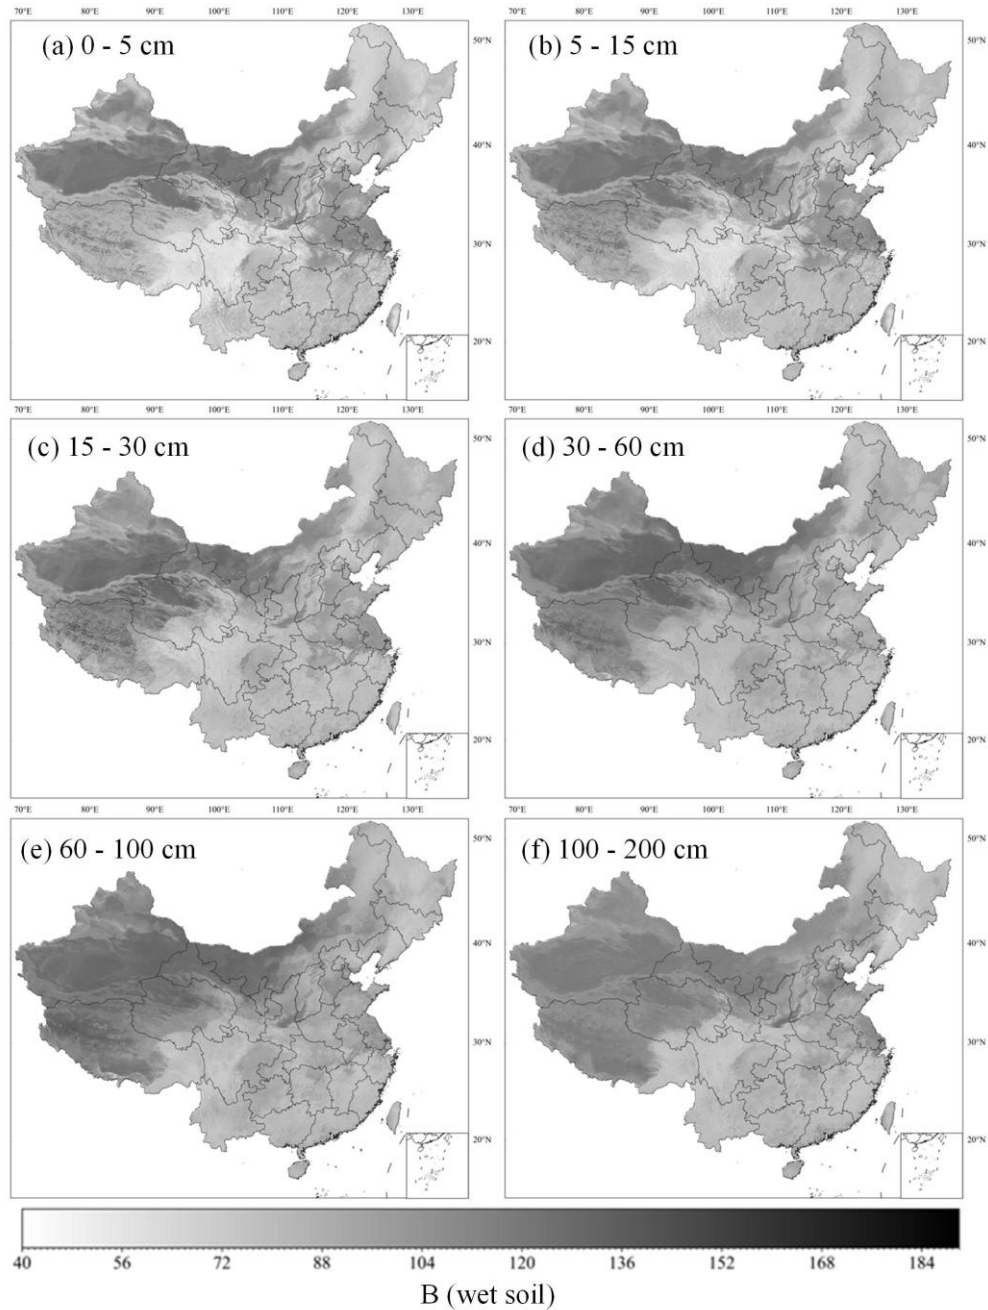

**Figure S26.** The predicted maps of the blue (B) component of wet soil color at multiple depths. (a) 0-5 cm; (b) 5-15 cm; (c) 15-30 cm; (d) 30-60 cm; (e) 60-100 cm; and (f) 100-200 cm depth interval. The B component represents the blue channel in the RGB soil color system.

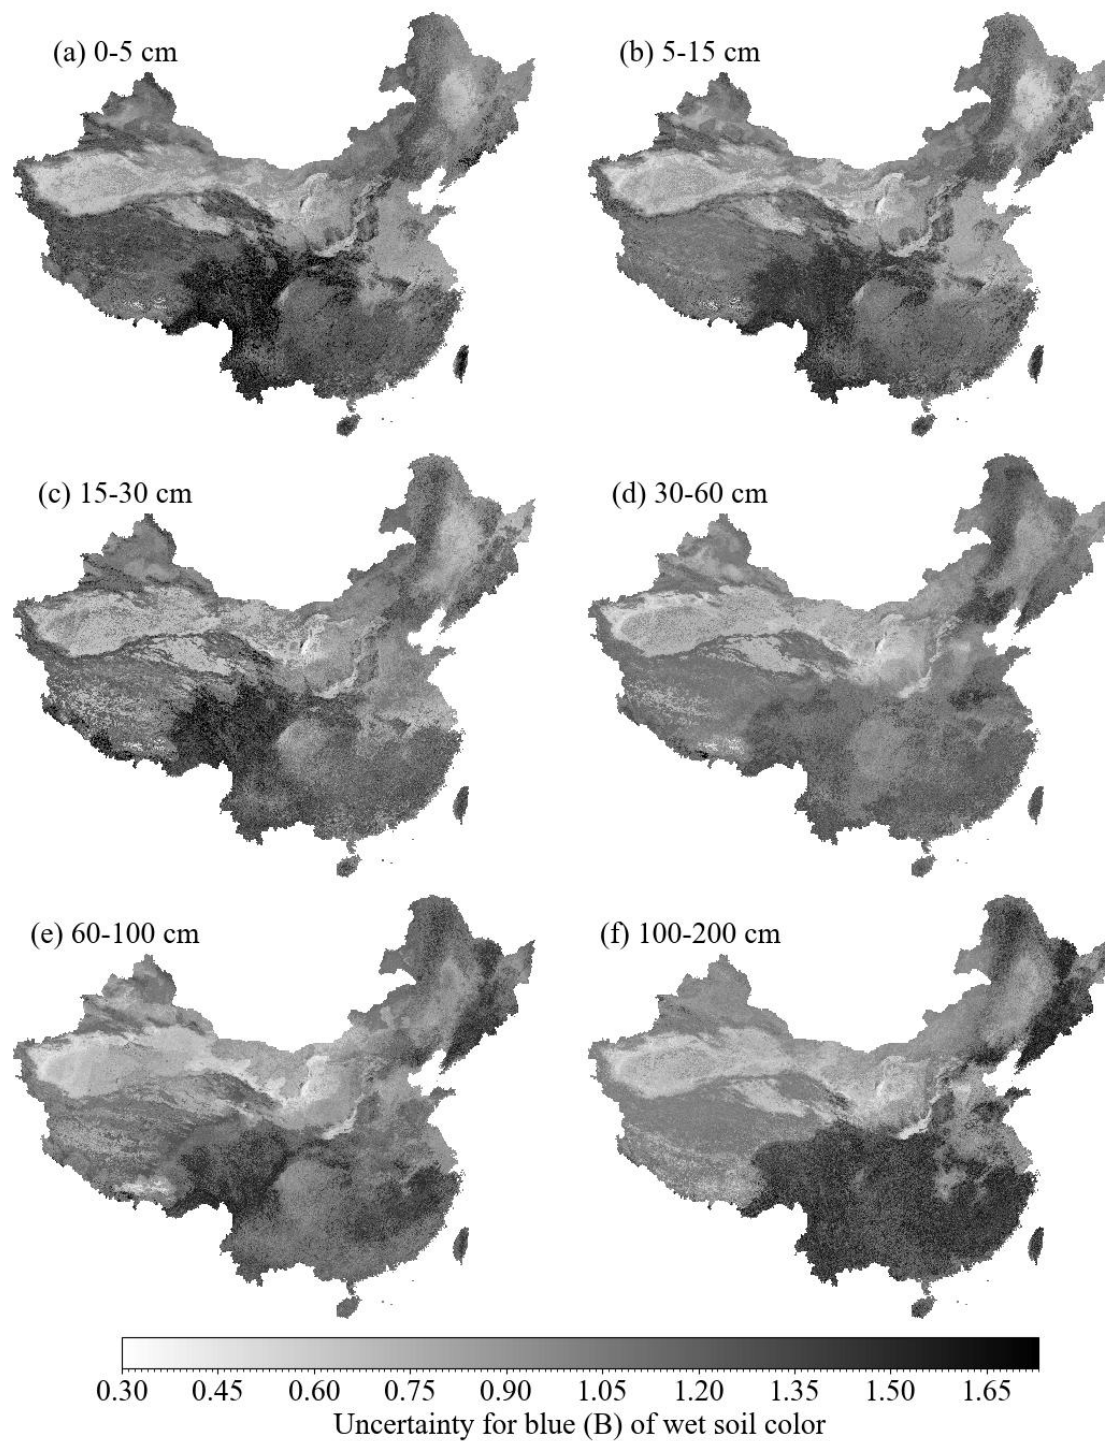

**Figure S27.** The maps of uncertainty of the blue (B) component of wet soil color predictions at the six depth intervals.



### S10.3 Variable importance

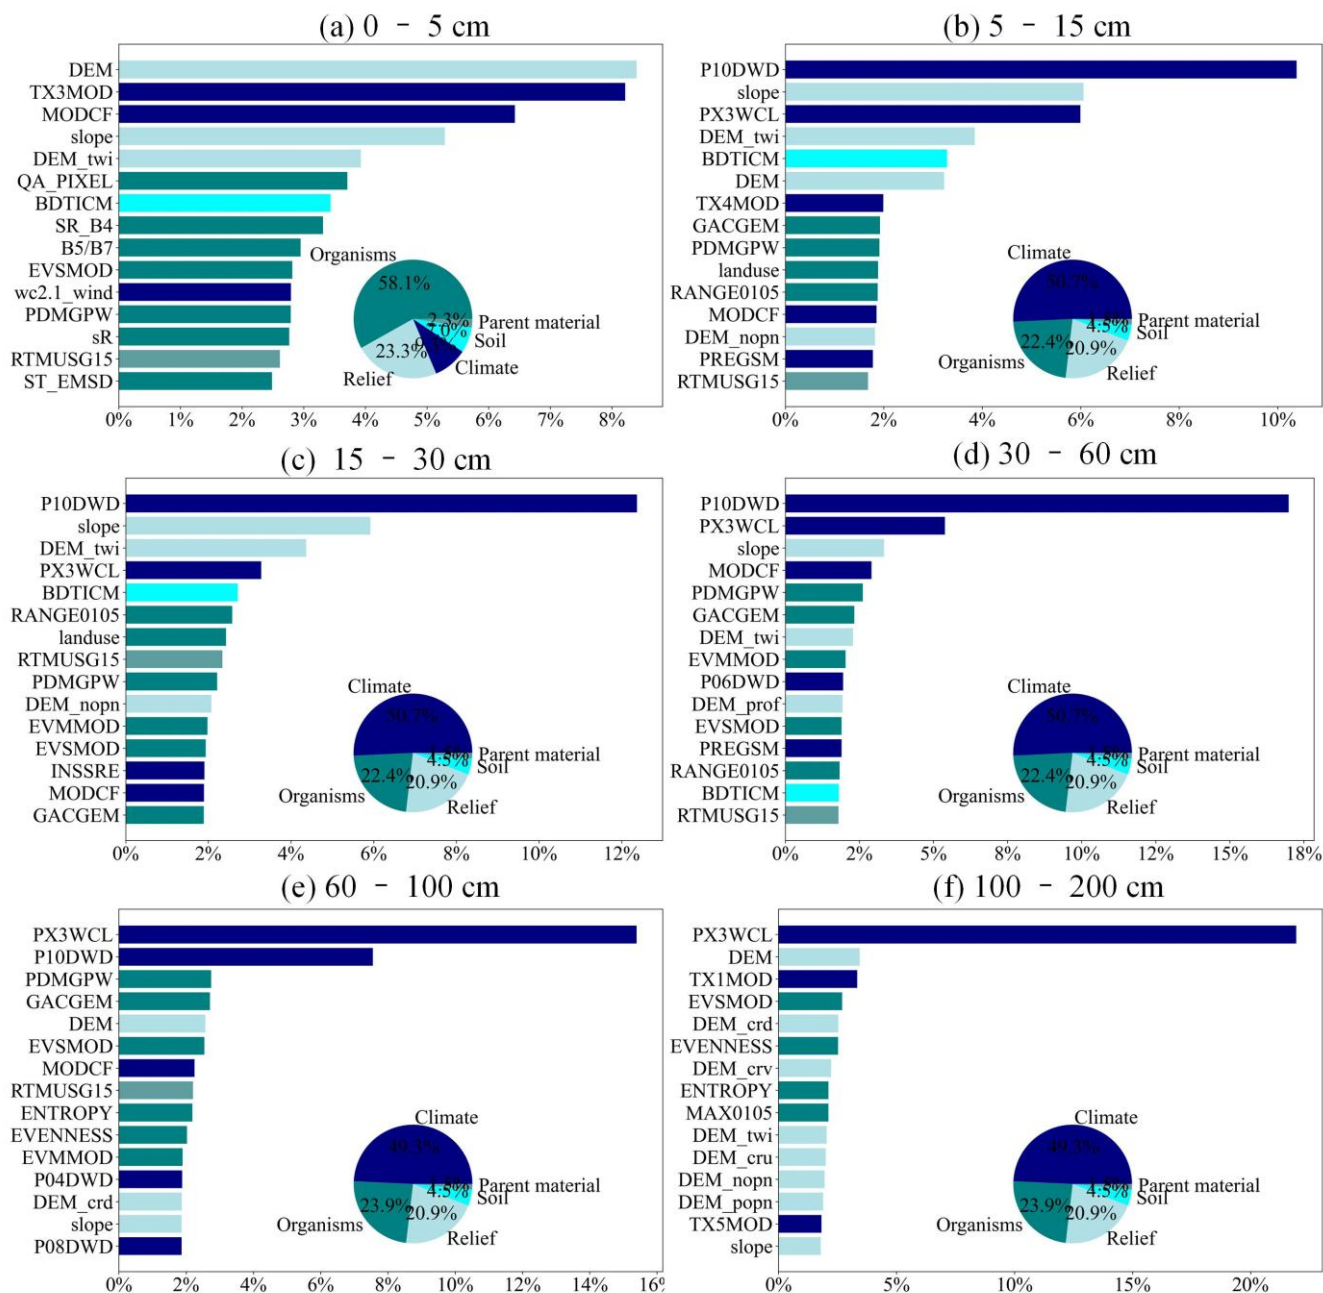

110 **Figure S28.** Relative importance of the top 15 predictors for the Quantile Regression Forest model in the spatial predictions of the blue (B) component of wet soil color at the six depth intervals. See Table S6 for abbreviations of the environmental covariates.

## S11 Red (R) of dry soil color

### S11.1 Prediction maps

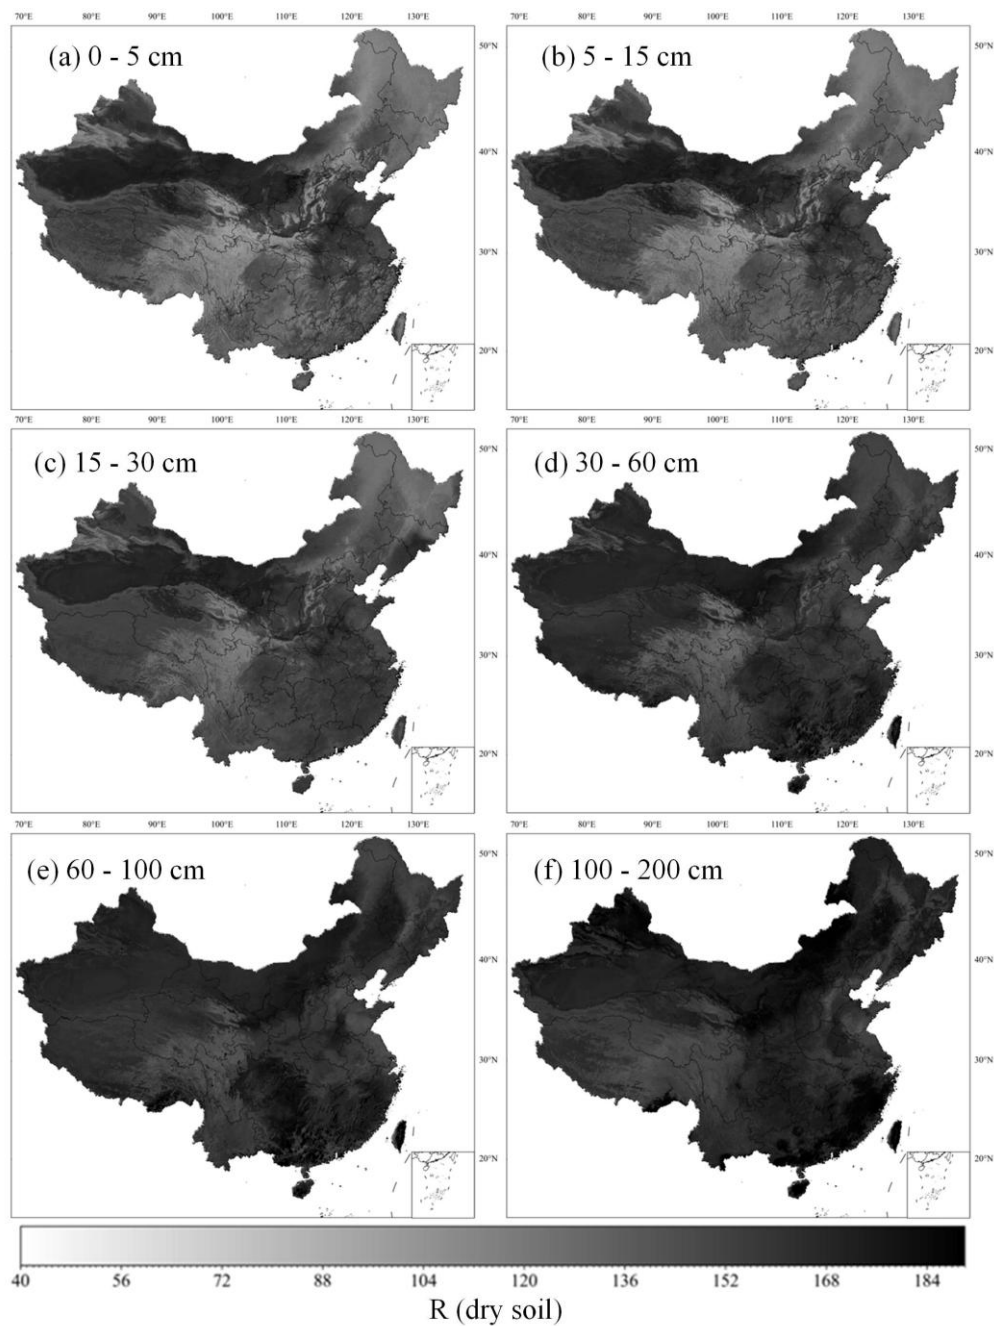

115 **Figure S29.** The predicted maps of the red (R) component of dry soil color at multiple depths. (a) 0-5 cm; (b) 5-15 cm; (c) 15-30 cm; (d) 30-60 cm; (e) 60-100 cm; and (f) 100-200 cm depth interval. The R component represents the red channel in the RGB soil color system.

## S11.2 Accuracy assessment

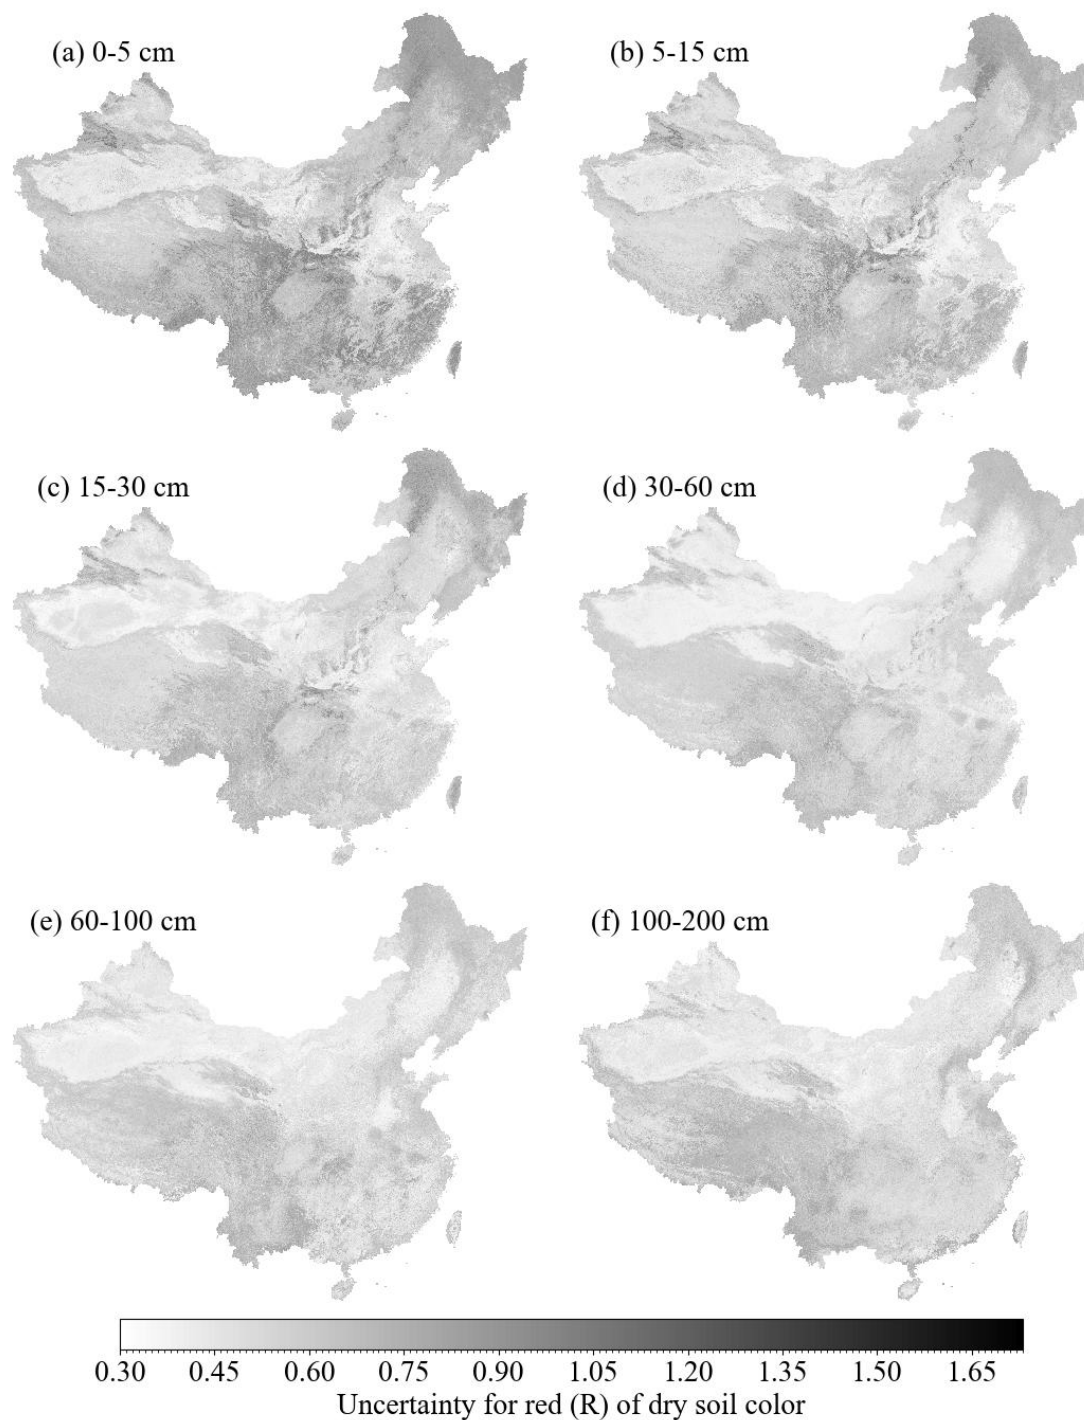

**Figure S30.** The maps of uncertainty of the red (R) component of dry soil color predictions at the six depth intervals.

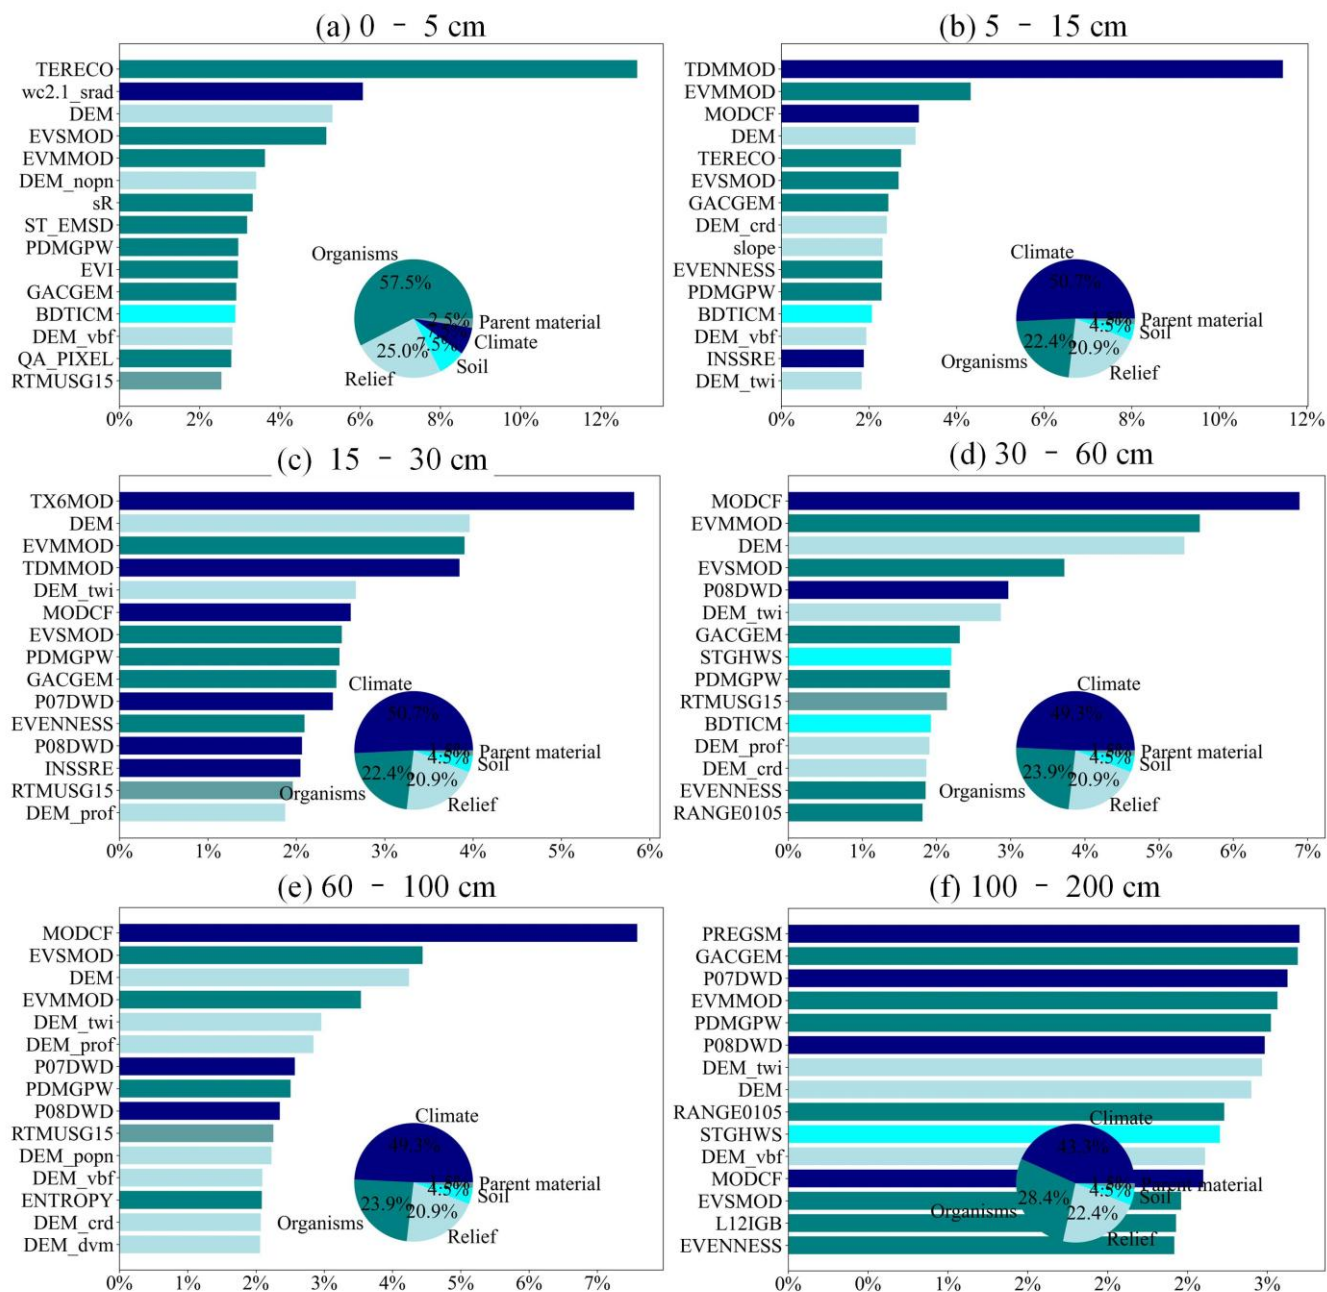

**Figure S31.** Relative importance of the top 15 predictors for the Quantile Regression Forest model in the spatial predictions of the red (R) component of dry soil color at the six depth intervals. See Table S6 for abbreviations of the environmental covariates.

## S12 Green (G) of dry soil color

### 125 S12.1 Prediction maps

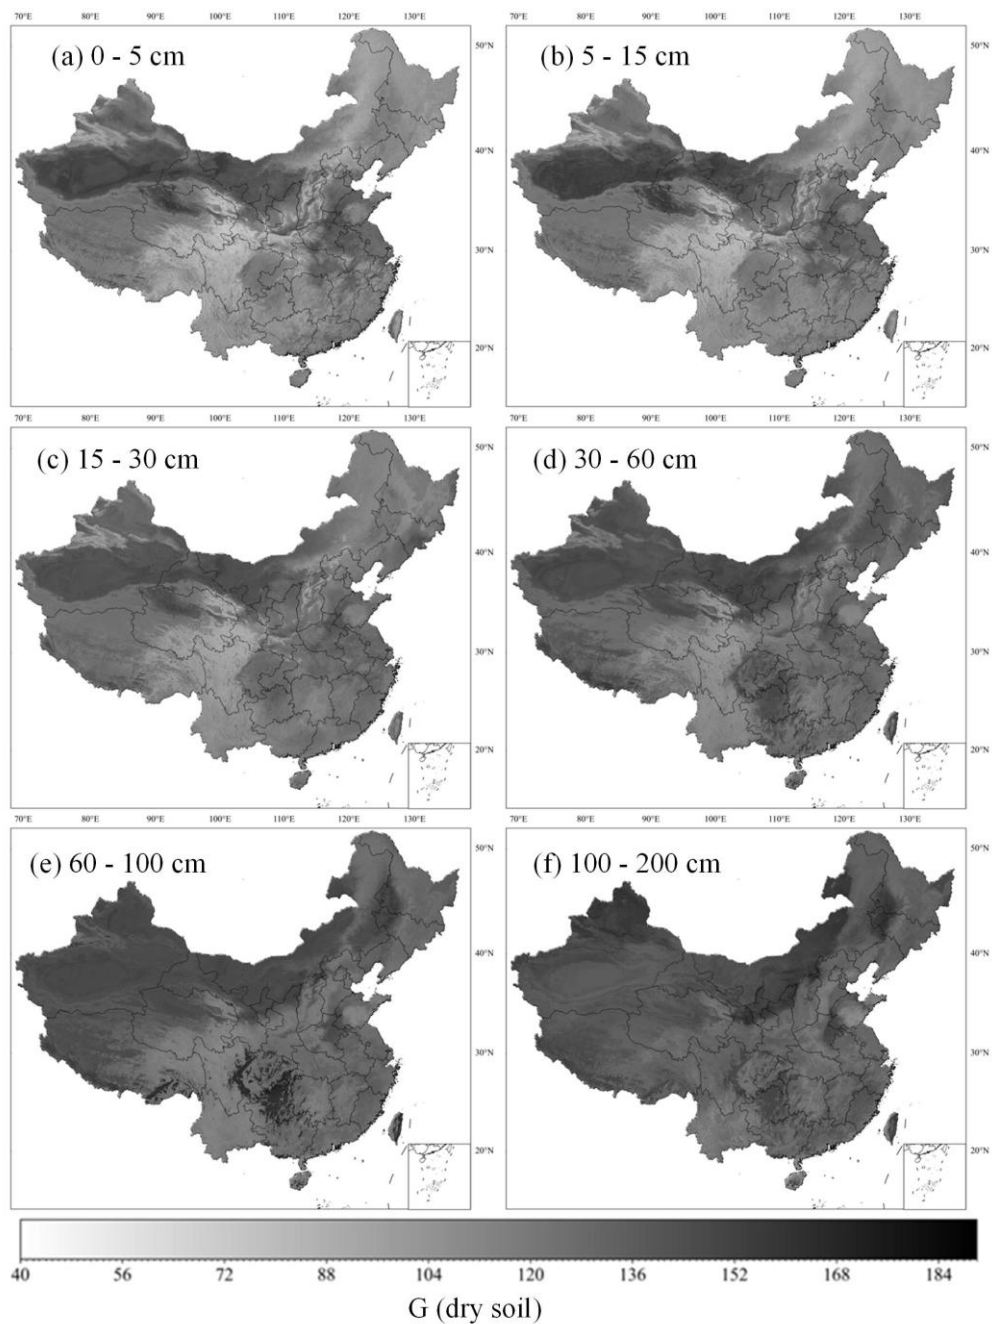

**Figure S32.** The predicted maps of the green (G) component of dry soil color at multiple depths. (a) 0-5 cm; (b) 5-15 cm; (c) 15-30 cm; (d) 30-60 cm; (e) 60-100 cm; and (f) 100-200 cm depth interval. The G component represents the green channel in the RGB soil color system.

## S12.2 Accuracy assessment

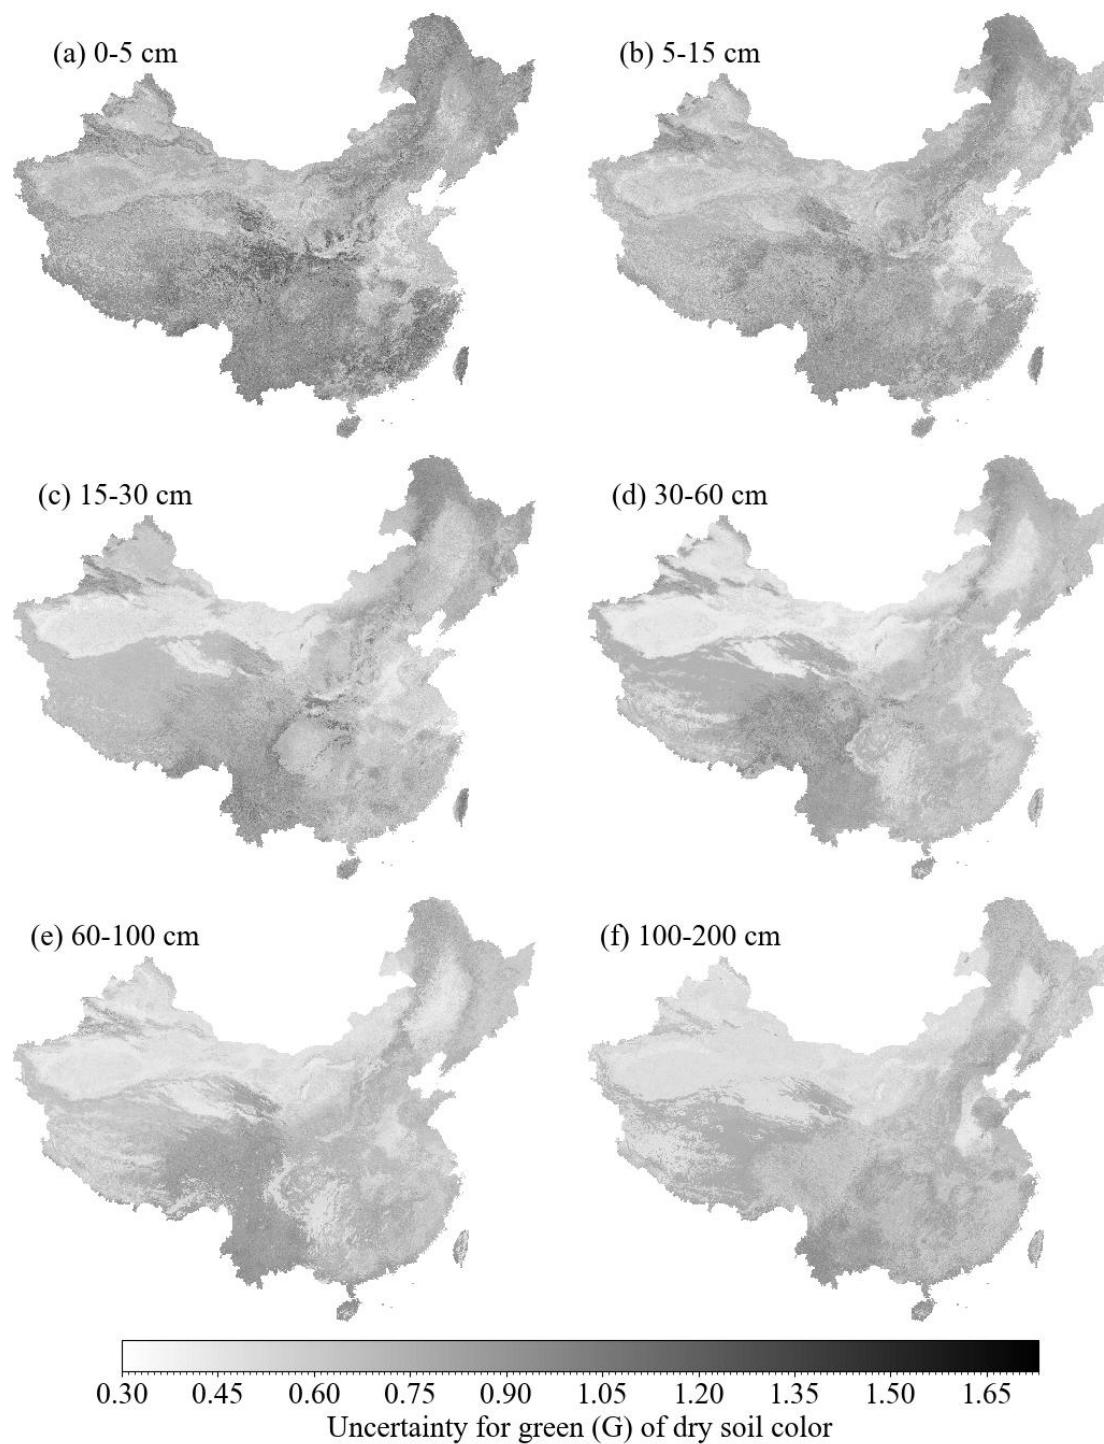

130

**Figure S33.** The maps of uncertainty of the green (G) component of dry soil color predictions at the six depth intervals.

### S12.3 Variable importance

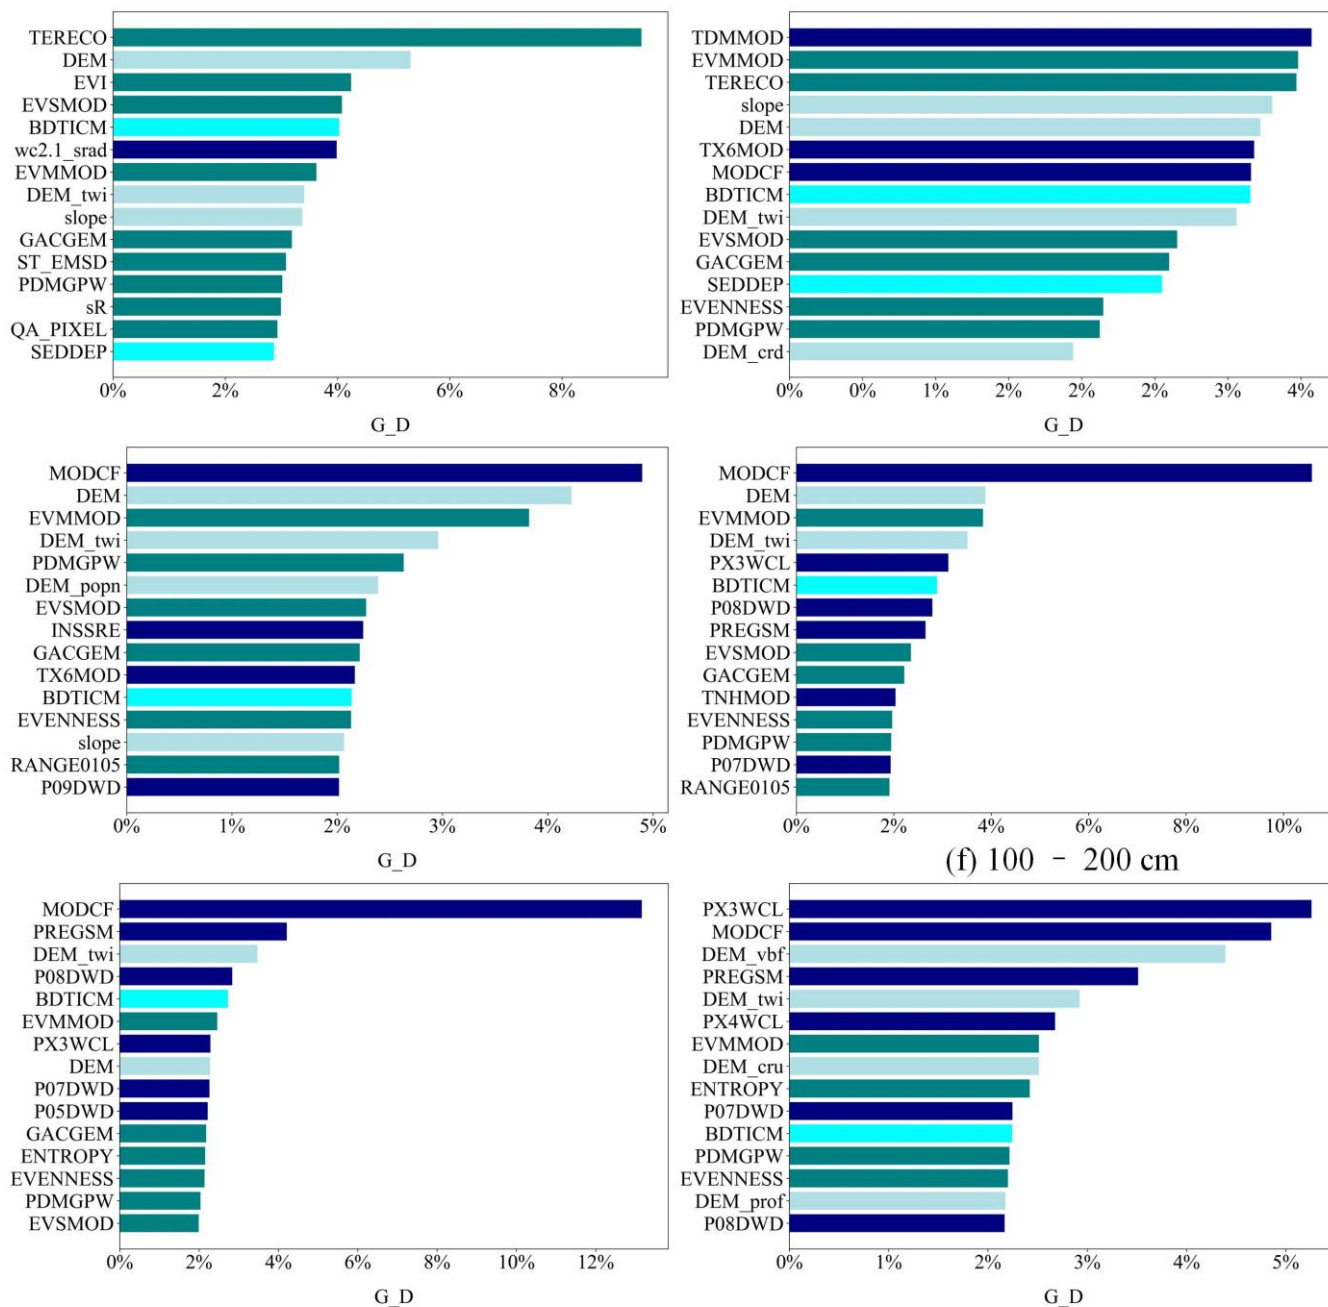

(f) 100 - 200 cm

135 **Figure S34.** Relative importance of the top 15 predictors for the Quantile Regression Forest model in the spatial predictions of the green (G) component of dry soil color at the six depth intervals. See Table S6 for abbreviations of the environmental covariates.

## S13 Blue (B) of dry soil color

### S13.1 Prediction maps

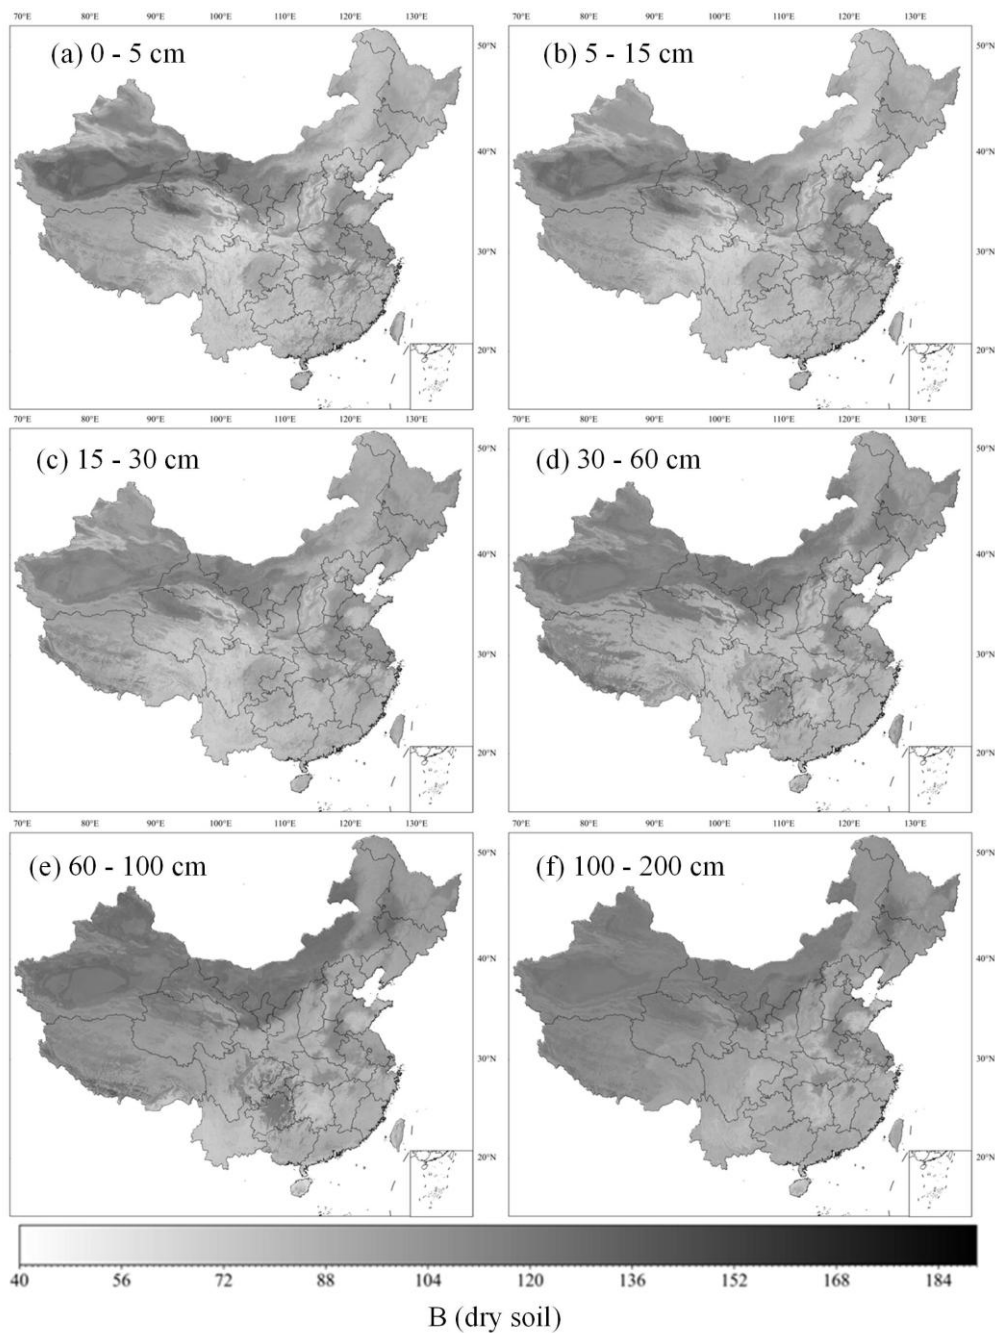

140 **Figure S35.** The predicted maps of the blue (B) component of dry soil color at multiple depths. (a) 0-5 cm; (b) 5-15 cm; (c) 15-30 cm; (d) 30-60 cm; (e) 60-100 cm; and (f) 100-200 cm depth interval. The B component represents the blue channel in the RGB soil color system.



### S13.2 Accuracy assessment

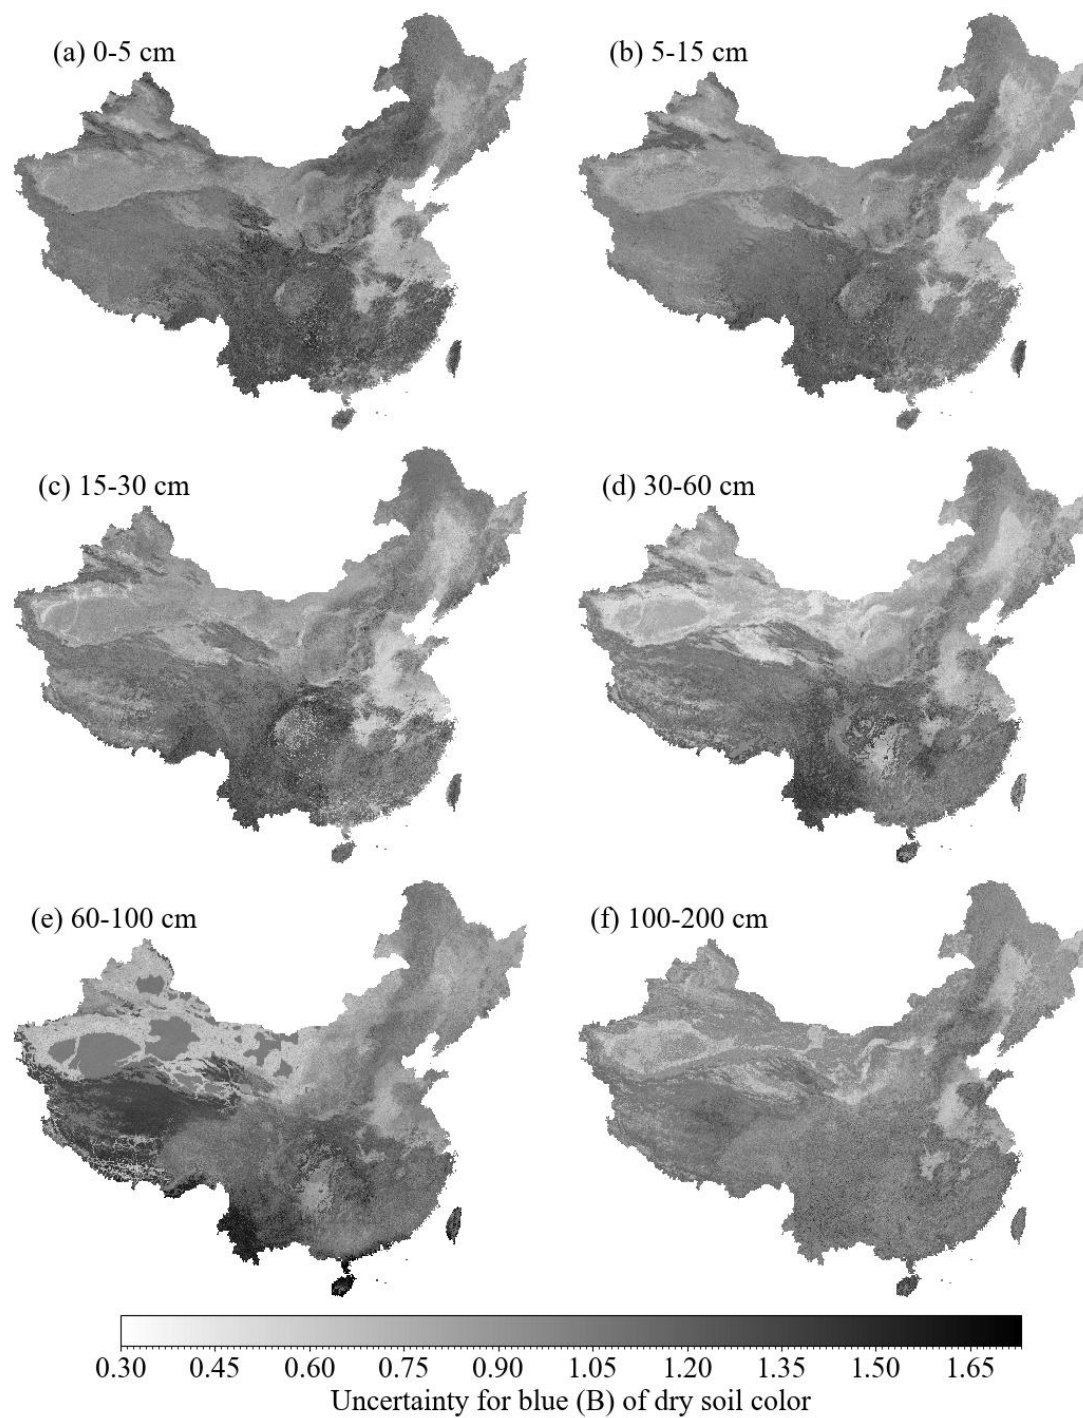

**Figure S36.** The maps of uncertainty of the blue (B) component of dry soil color predictions at the six depth intervals.

### S13.3 Variable importance

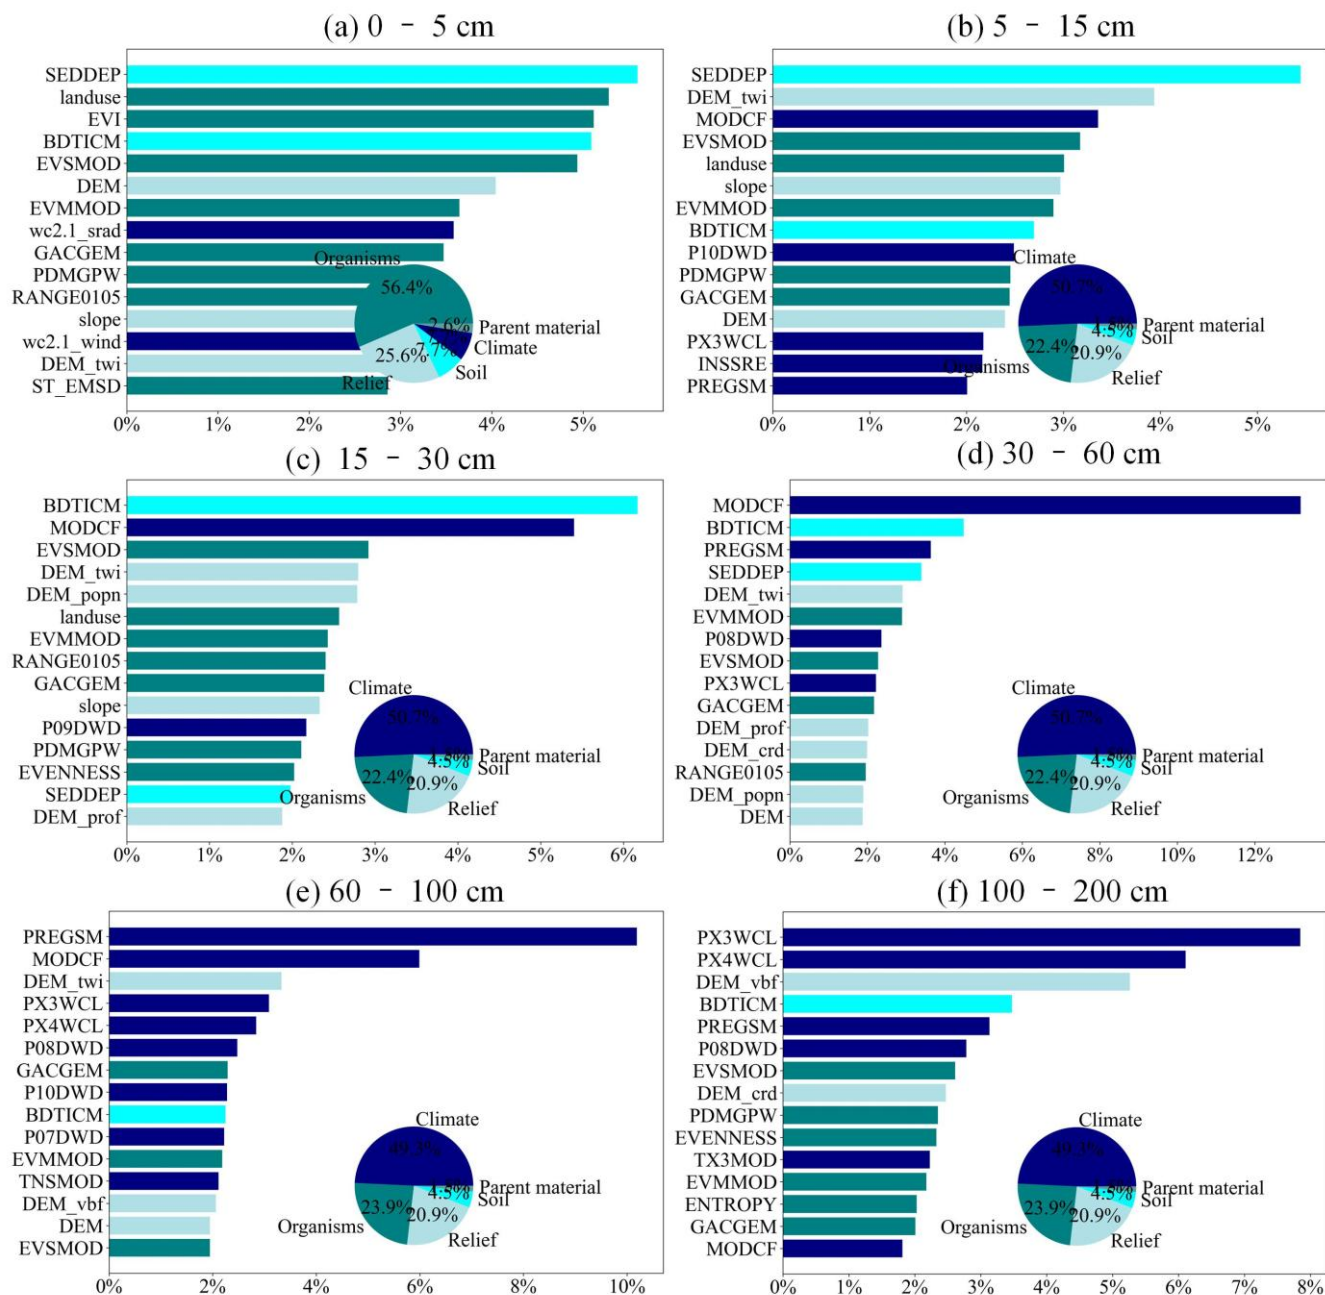

**Figure S37.** Relative importance of the top 15 predictors for the Quantile Regression Forest model in the spatial predictions of the blue (B) component of dry soil color at the six depth intervals. See Table S6 for abbreviations of the environmental covariates.

## S14 Wet soil colours

### S14.1 Prediction maps

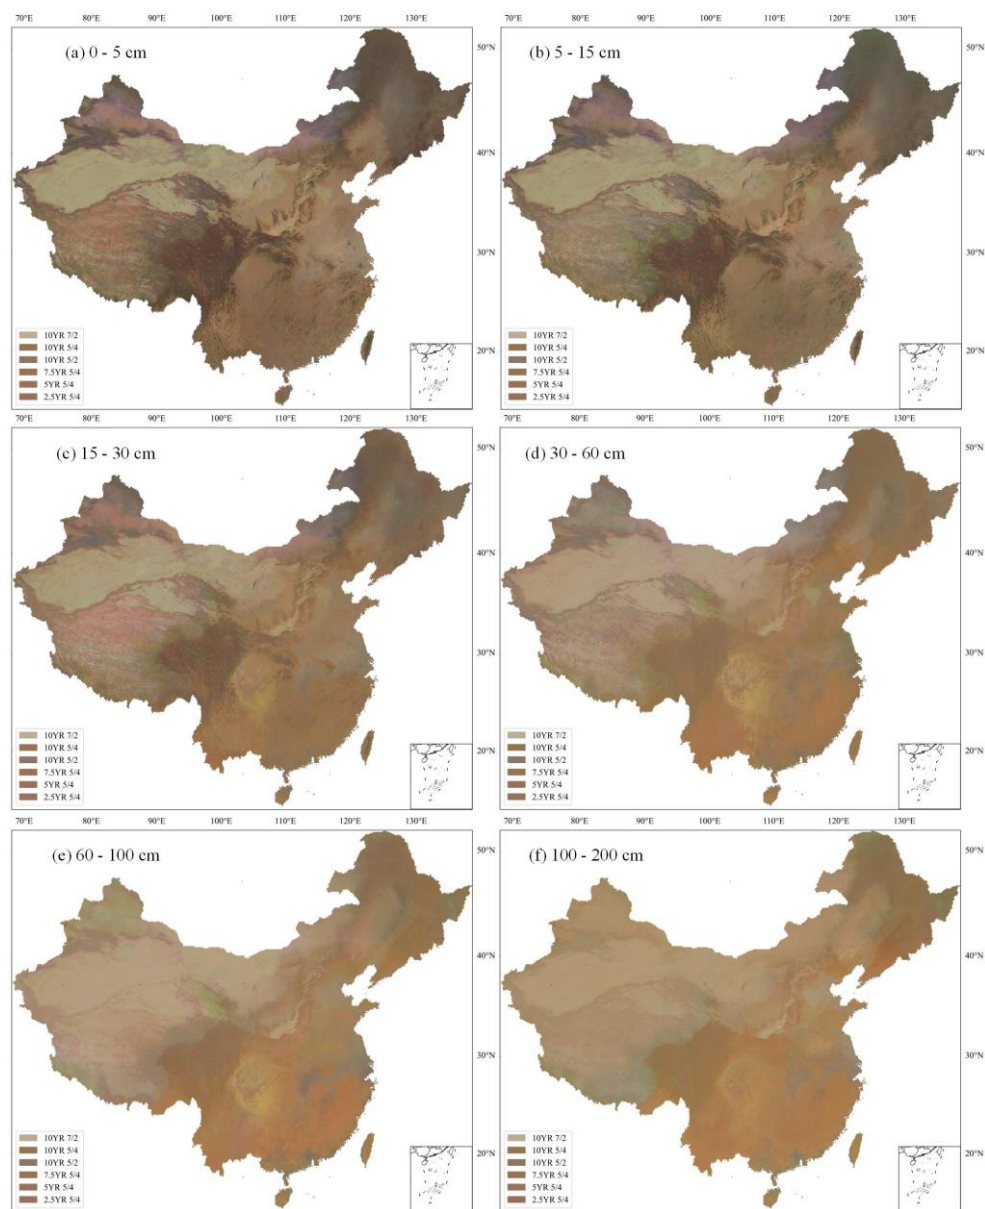

150

**Figure S38.** The predicted maps of wet soil colours at multiple depths. The colour bar only displays six representative colours, with some less distinctive colours aggregated for clarity. (a) 0-5 cm; (b) 5-15 cm; (c) 15-30 cm; (d) 30-60 cm; (e) 60-100 cm and (f) 100-200 cm depth interval.

## S15 Dry soil colours

### 155 S15.1 Prediction maps

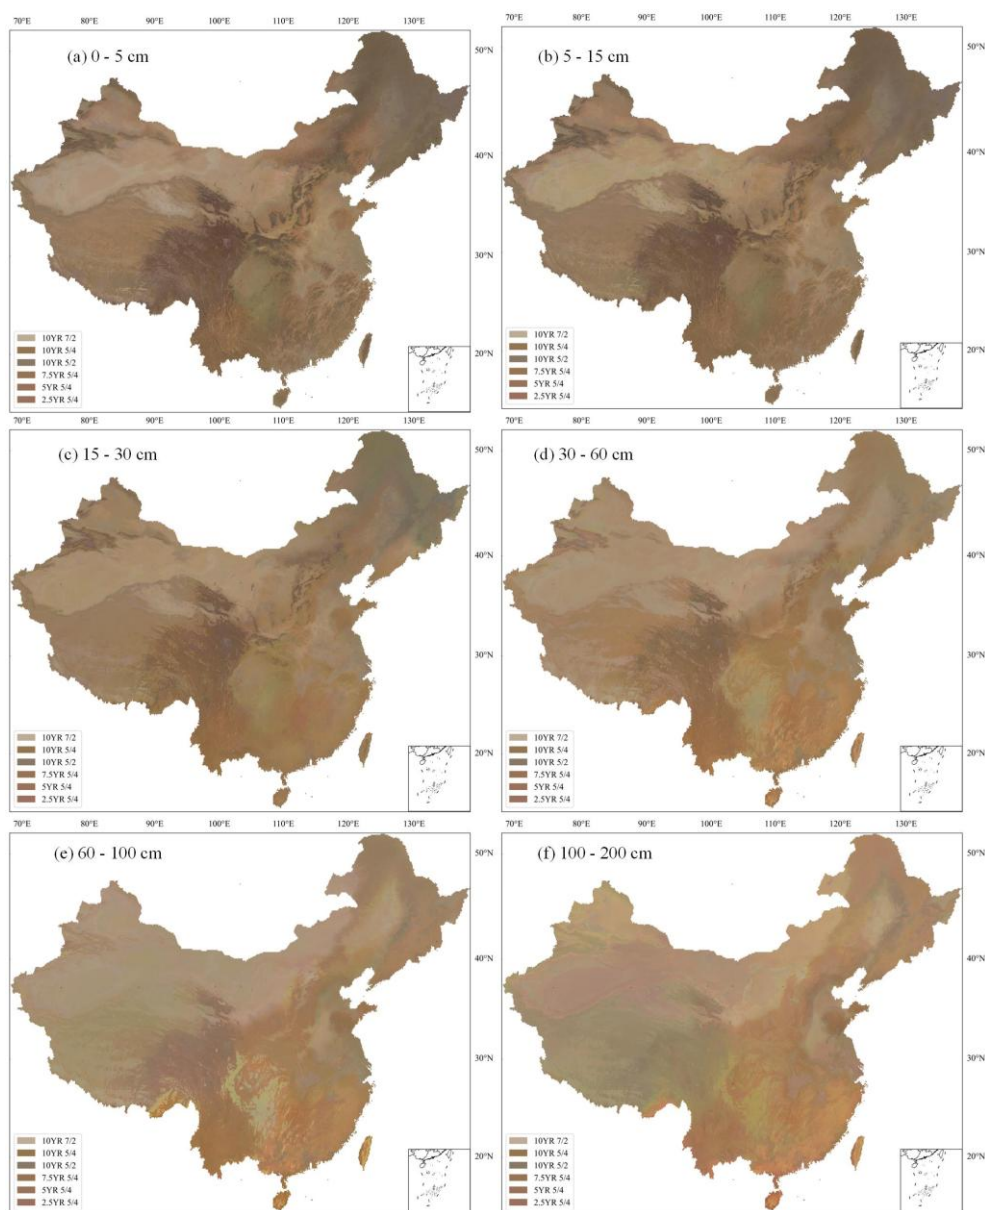

**Figure S39.** The predicted maps of dry soil colours at multiple depths. The colour bar only displays six representative colours, with some less distinctive colours aggregated for clarity. (a) 0-5 cm; (b) 5-15 cm; (c) 15-30 cm; (d) 30-60 cm; (e) 60-100 cm and (f) 100-200 cm depth interval.

## S16.1 Prediction maps

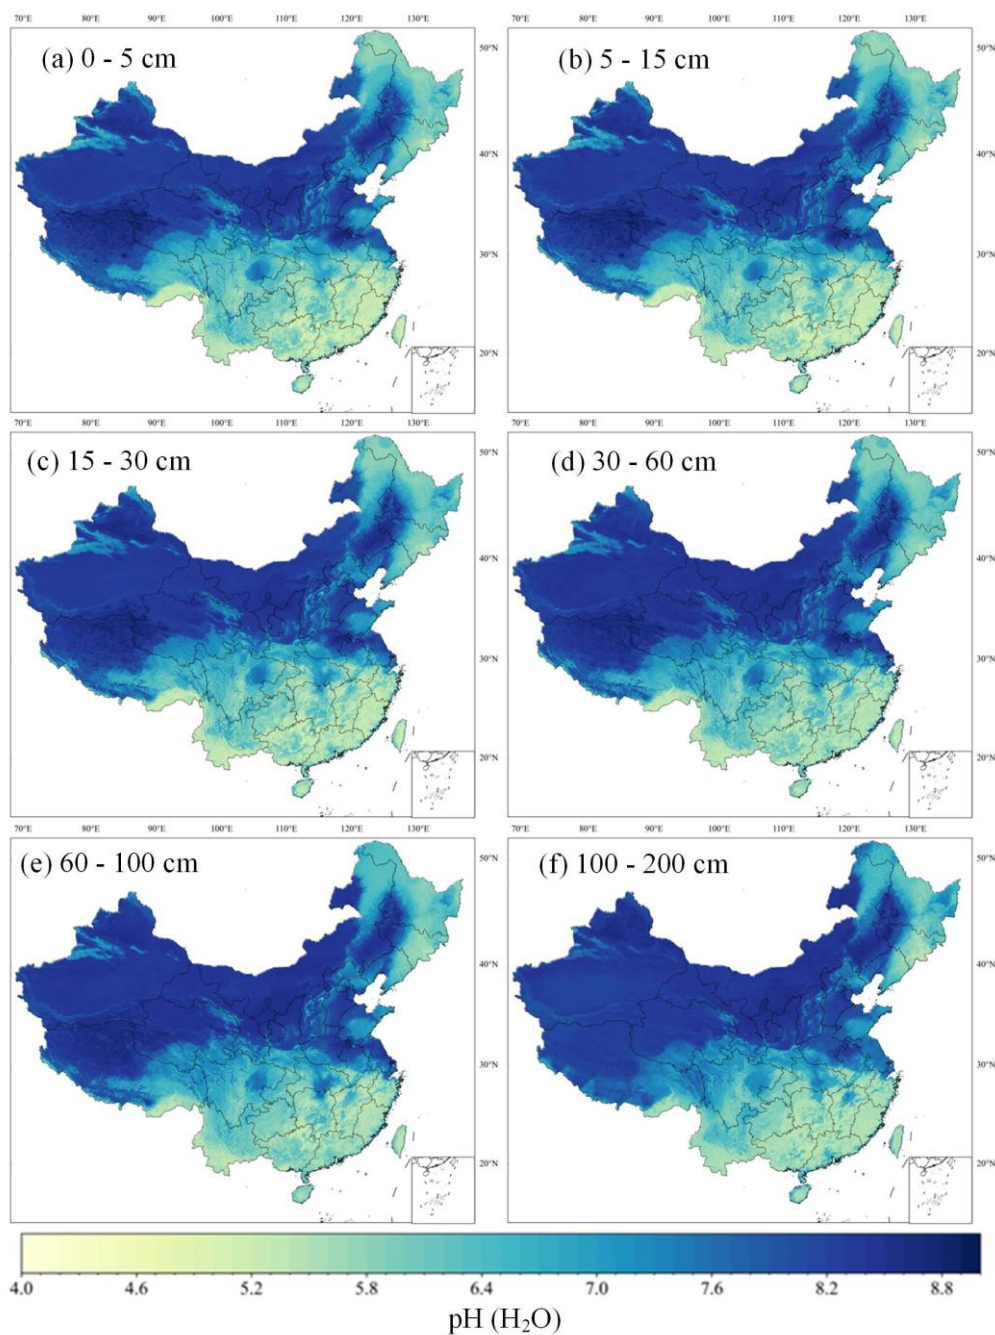

**Figure S40.** The predicted maps of soil pH at multiple depths. (a) 0-5 cm; (b) 5-15 cm; (c) 15-30 cm; (d) 30-60 cm; (e) 60-100 cm and (f) 100-200 cm depth interval.

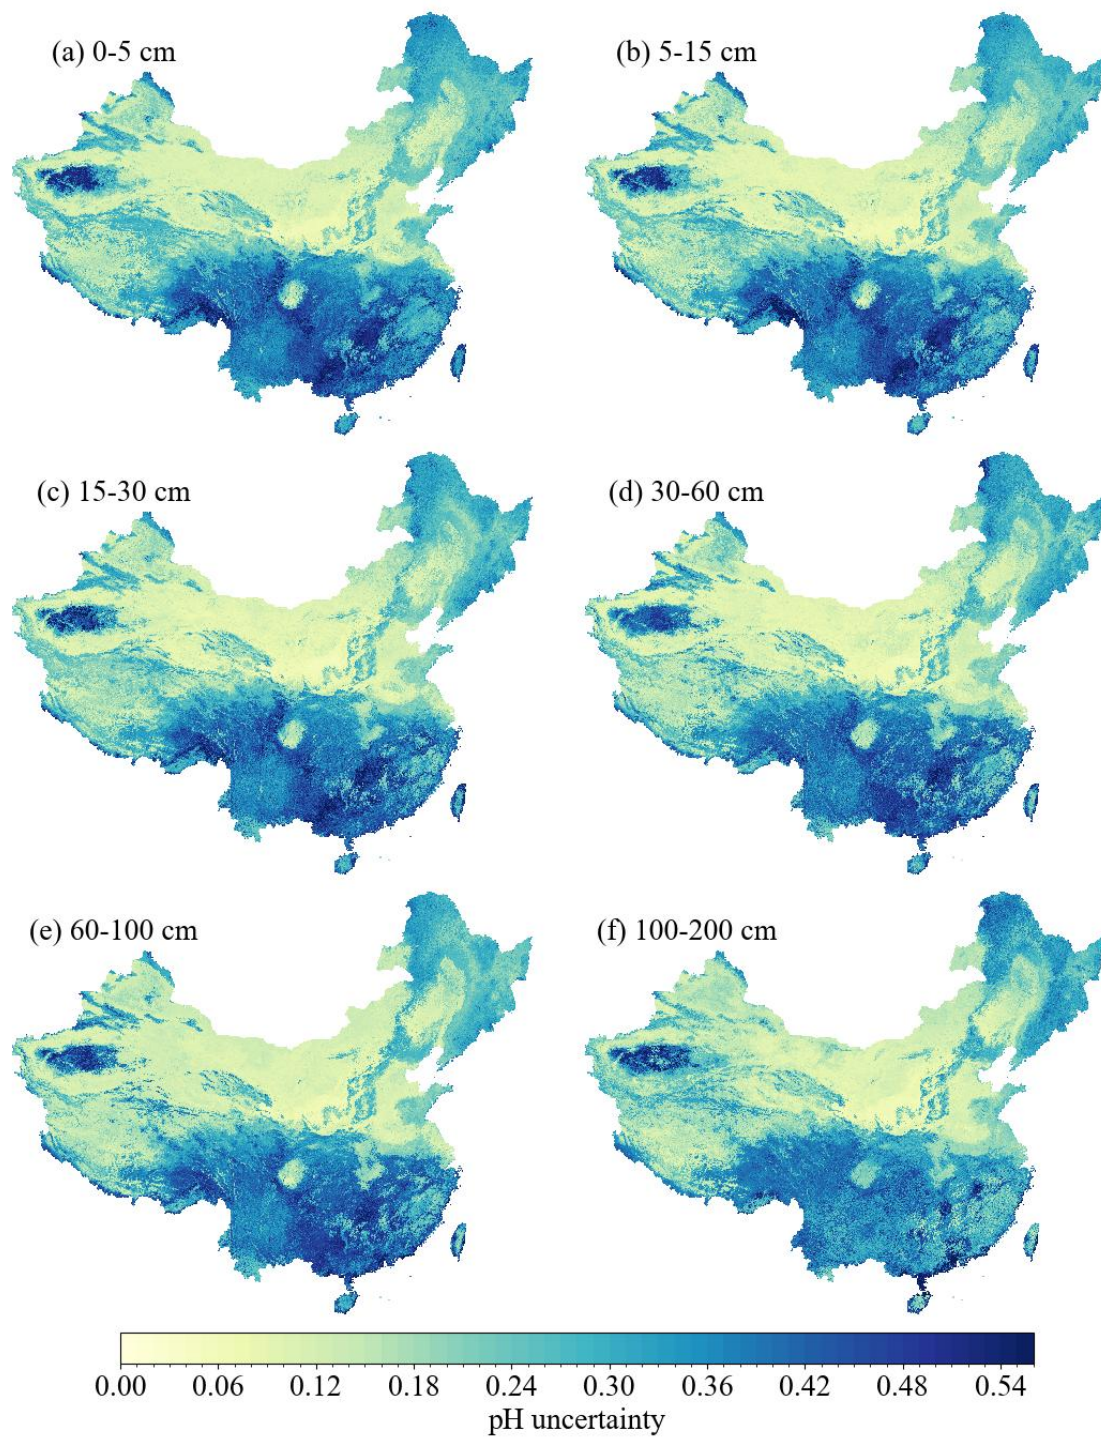

**Figure S41.** The maps of uncertainty of soil soil pH predictions at the six depth intervals.

### S16.3 Variable importance

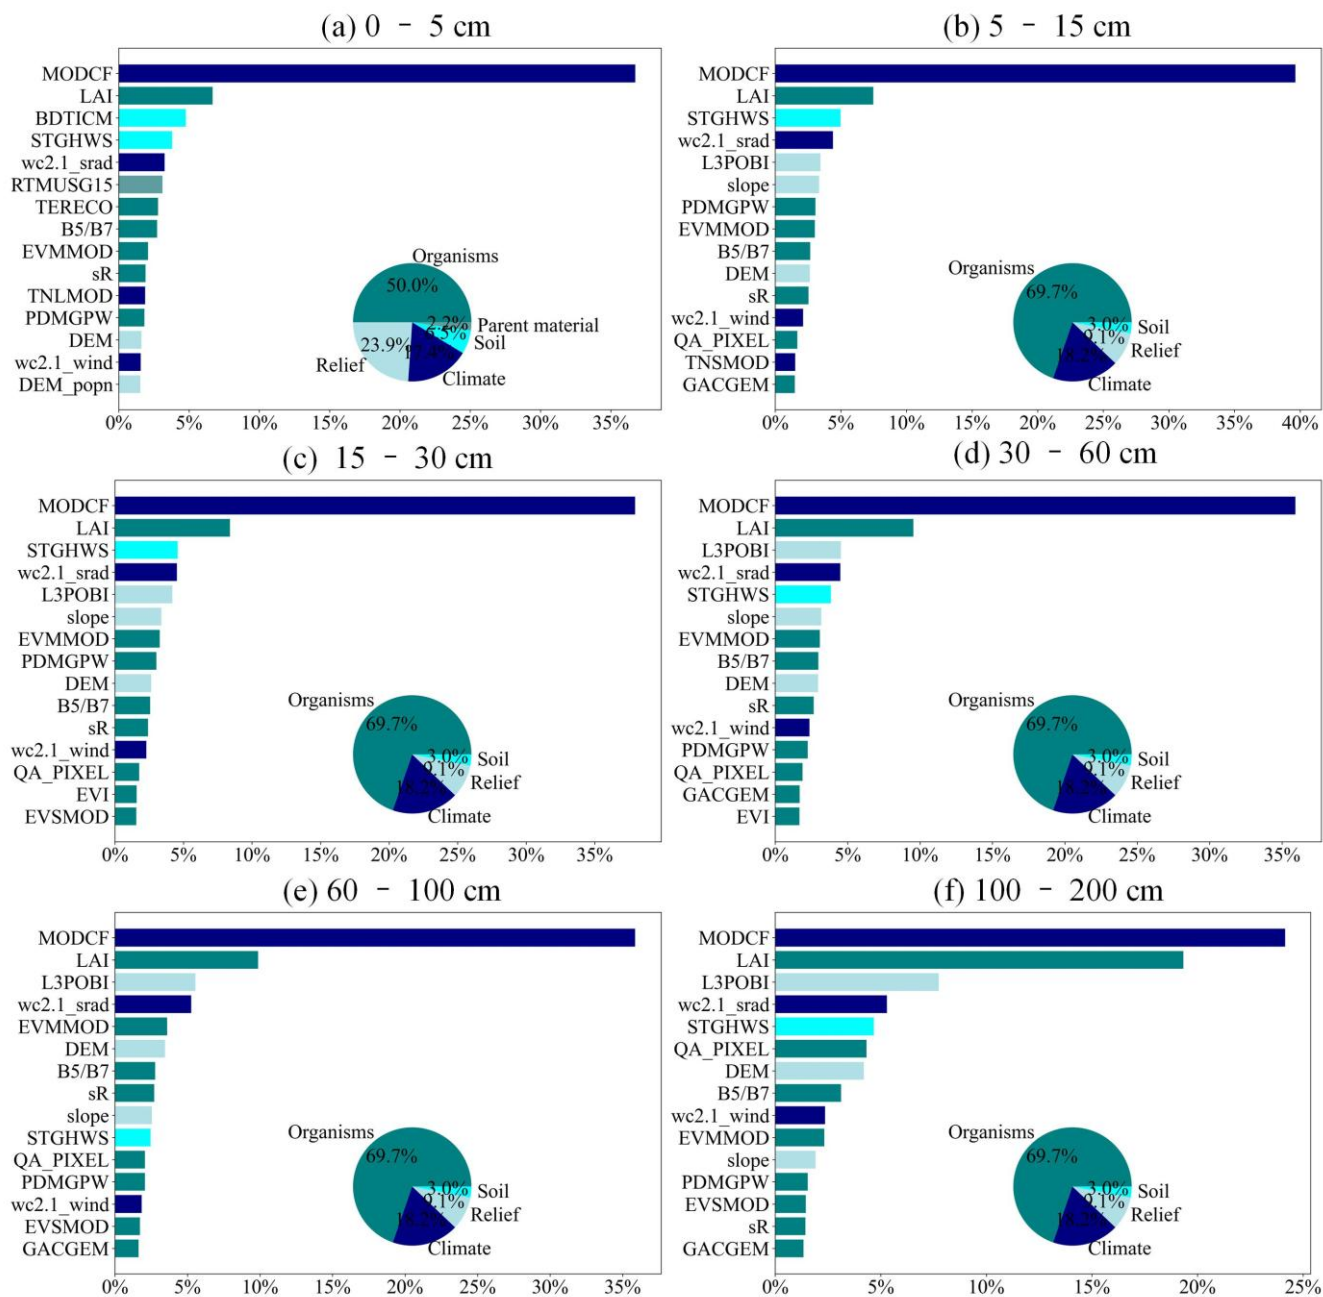

170 **Figure S42.** Relative importance of the top 15 predictors for the Quantile Regression Forest model in the spatial predictions of soil pH at the six depth intervals. See Table S6 for abbreviations of the environmental covariates.

## S17 Soil organic carbon (OC)

### S17.1 Prediction maps

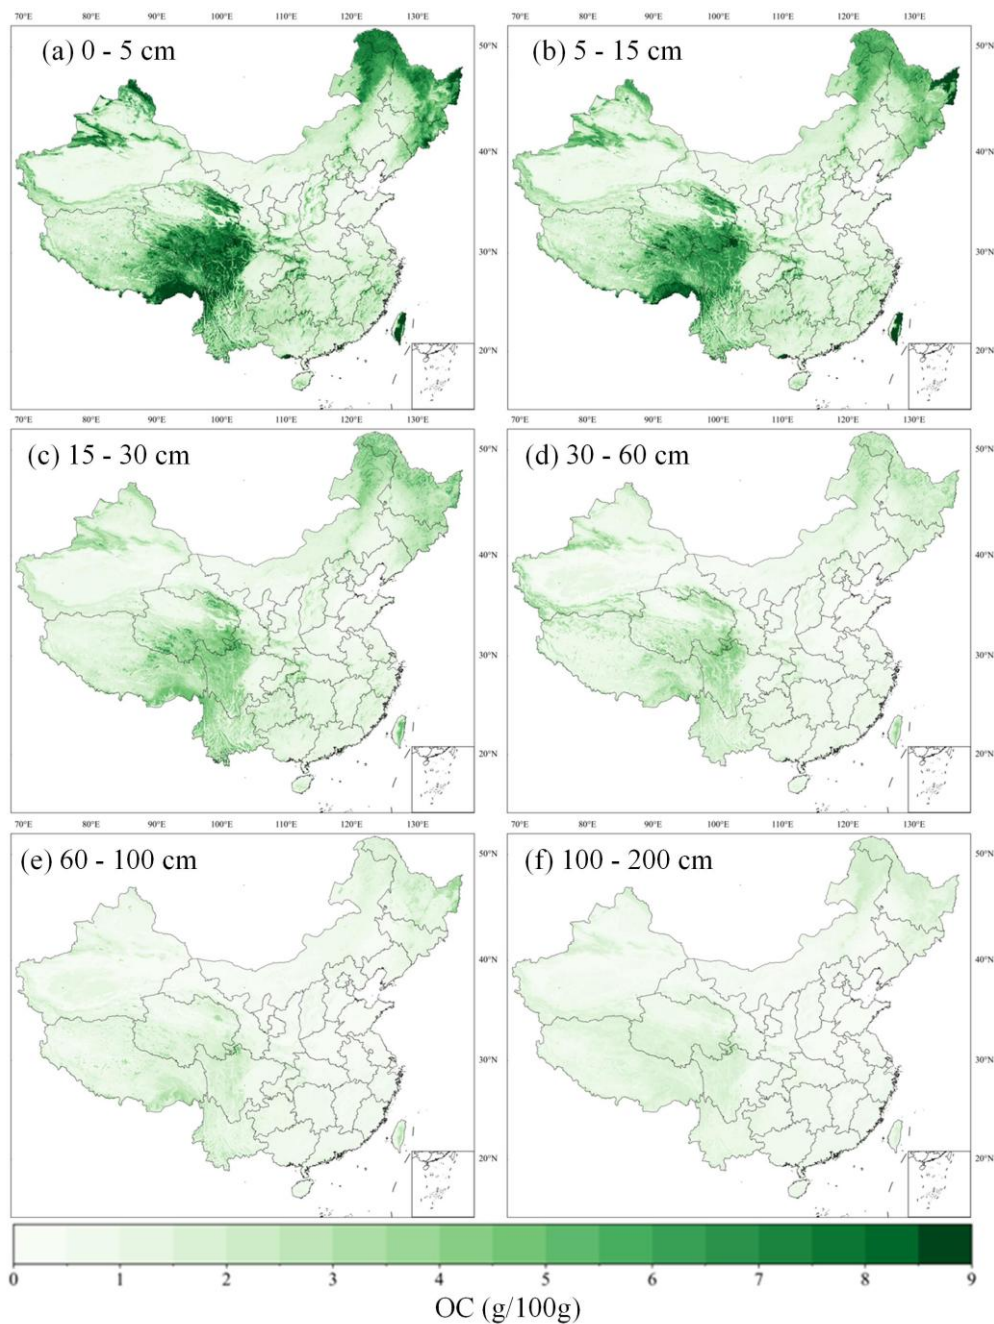

175 **Figure S43.** The predicted maps of soil organic carbon (OC) content at multiple depths (g/100g). (a) 0-5 cm; (b) 5-15 cm; (c) 15-30 cm; (d) 30-60 cm; (e) 60-100 cm and (f) 100-200 cm depth interval.



## S17.2 Accuracy assessment

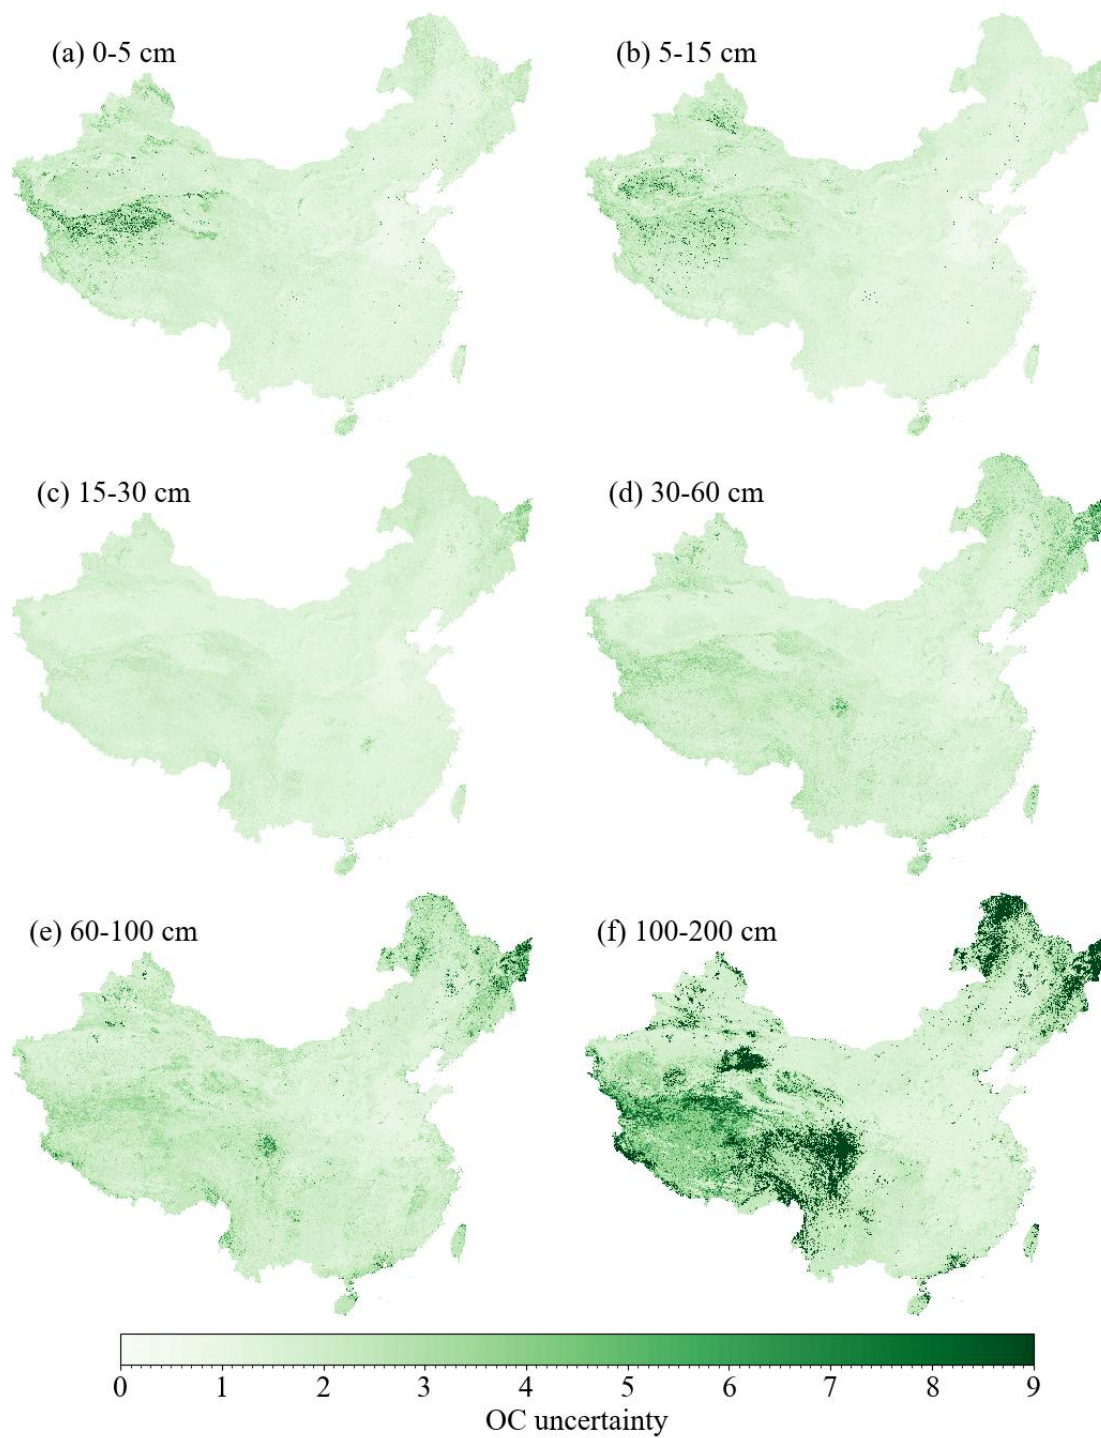

**Figure S44.** The maps of uncertainty of soil organic carbon (OC) content predictions at the six depth intervals.

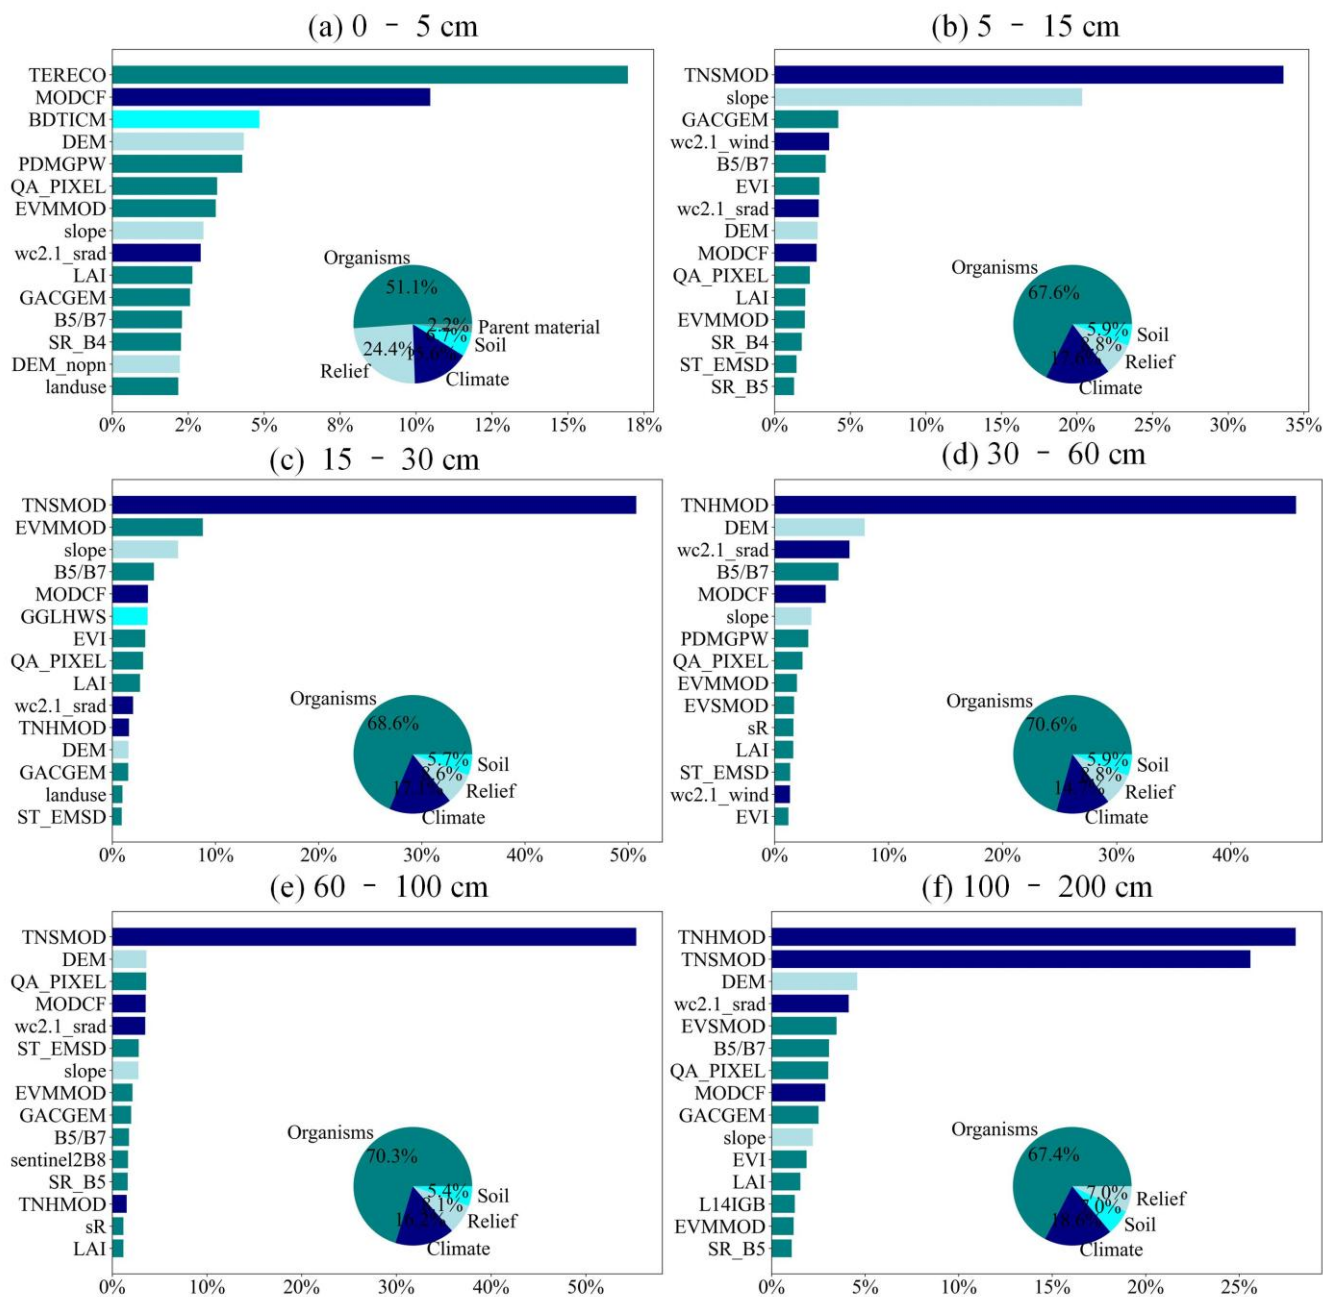

**Figure S45.** Relative importance of the top 15 predictors for the Quantile Regression Forest model in the spatial predictions of soil organic carbon content (OC) at the six depth intervals. See Table S6 for abbreviations of the environmental covariates.

## S18 Cation exchange capacity (CEC)

### 185 S18.1 Prediction maps

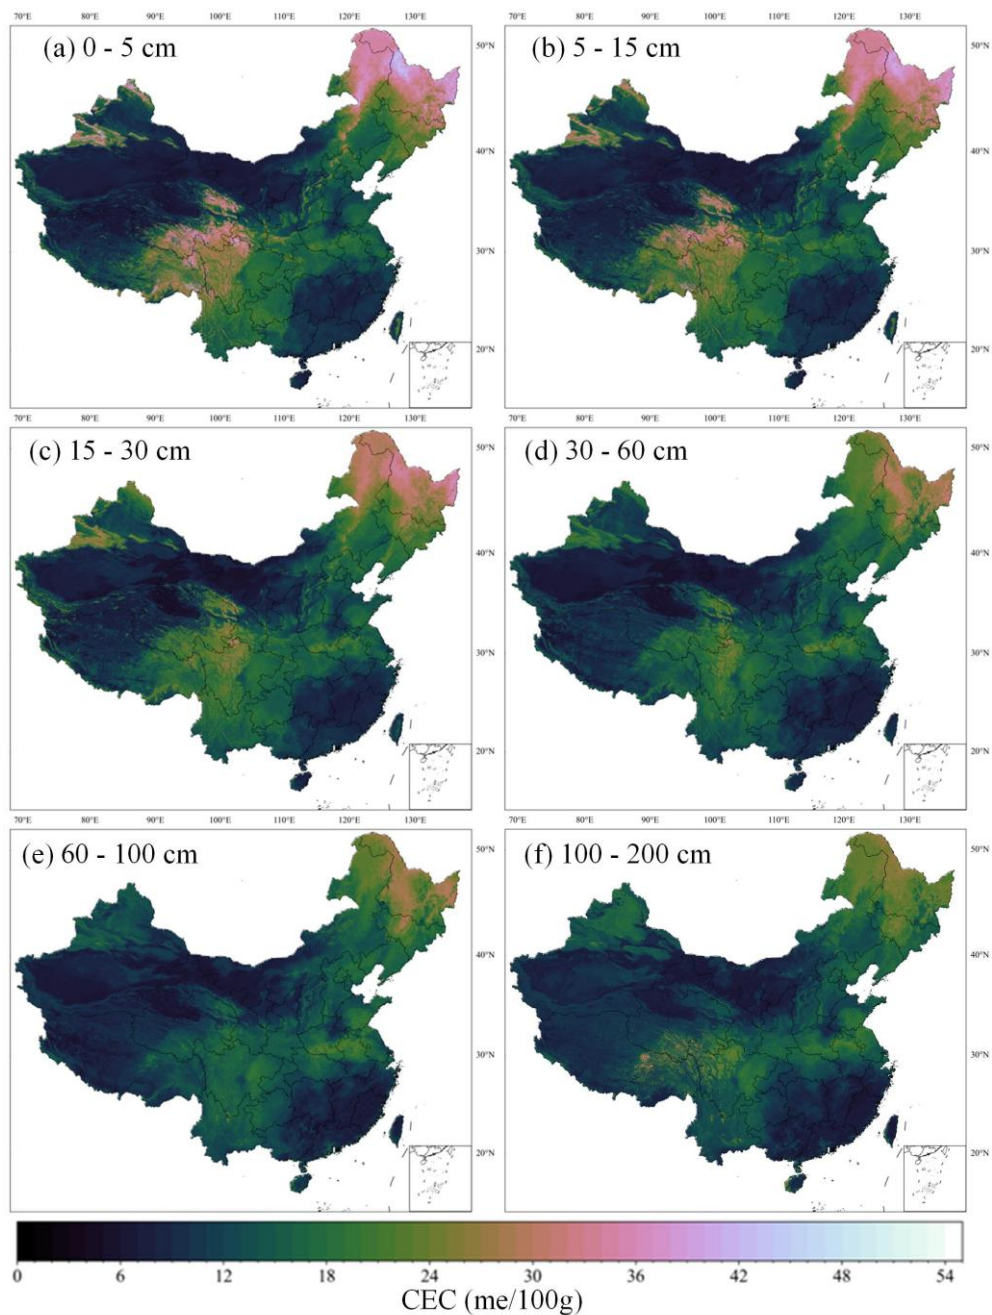

**Figure S46.** The predicted maps of cation exchange capacity (CEC) content at multiple depths (me/100g). (a) 0-5 cm; (b) 5-15 cm; (c) 15-30 cm; (d) 30-60 cm; (e) 60-100 cm and (f) 100-200 cm depth interval.

## S18.2 Accuracy assessment

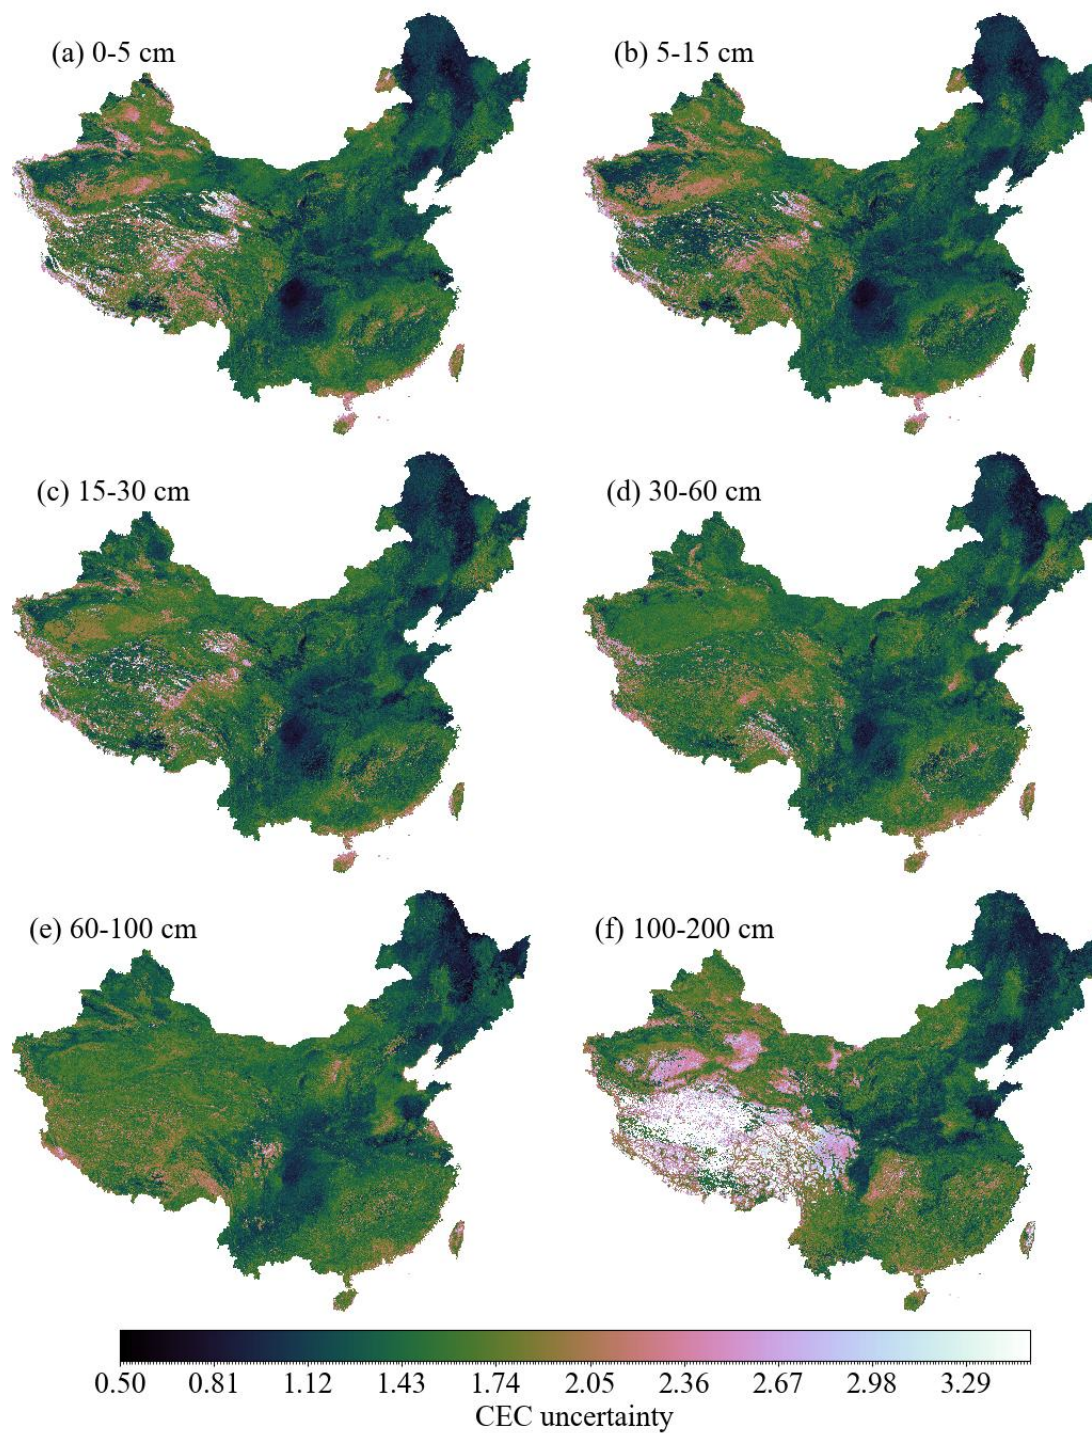

190

**Figure S47.** The maps of uncertainty of cation exchange capacity (CEC) predictions at the six depth intervals.

### S18.3 Variable importance

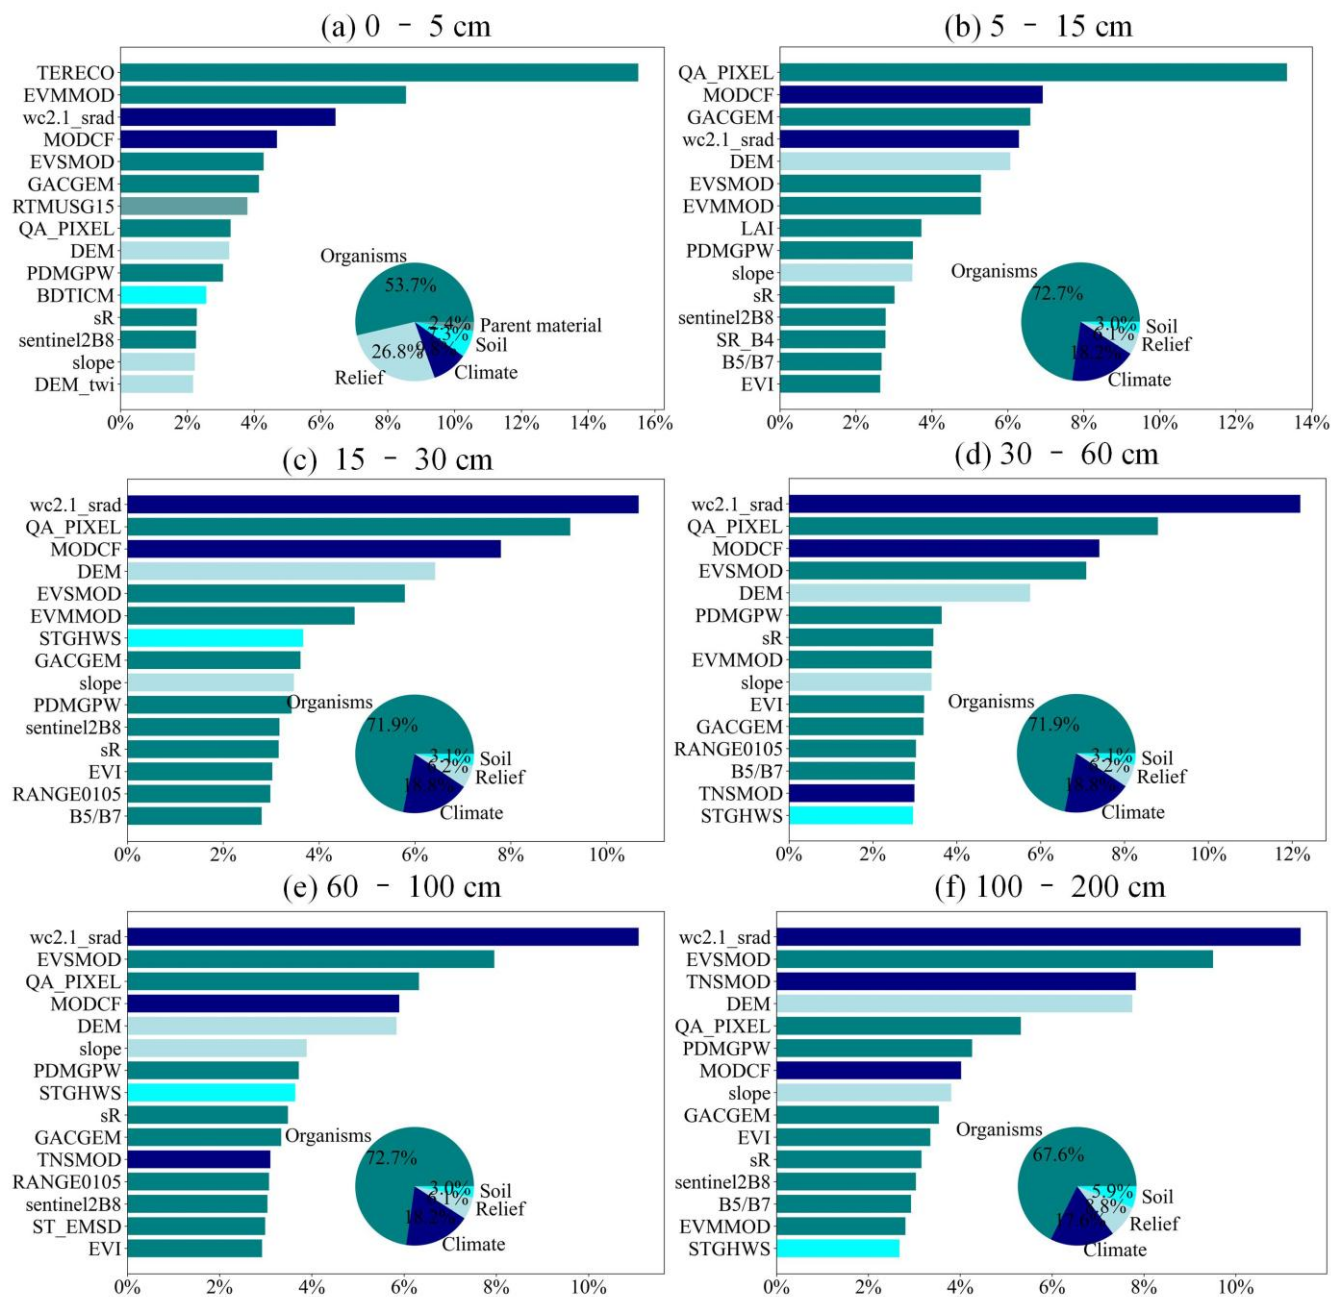

195 **Figure S48.** Relative importance of the top 15 predictors for the Quantile Regression Forest model in the spatial predictions of cation exchange capacity (CEC) at the six depth intervals. See Table S6 for abbreviations of the environmental covariates.

## S19 Total nitrogen (TN)

### S19.1 Prediction maps

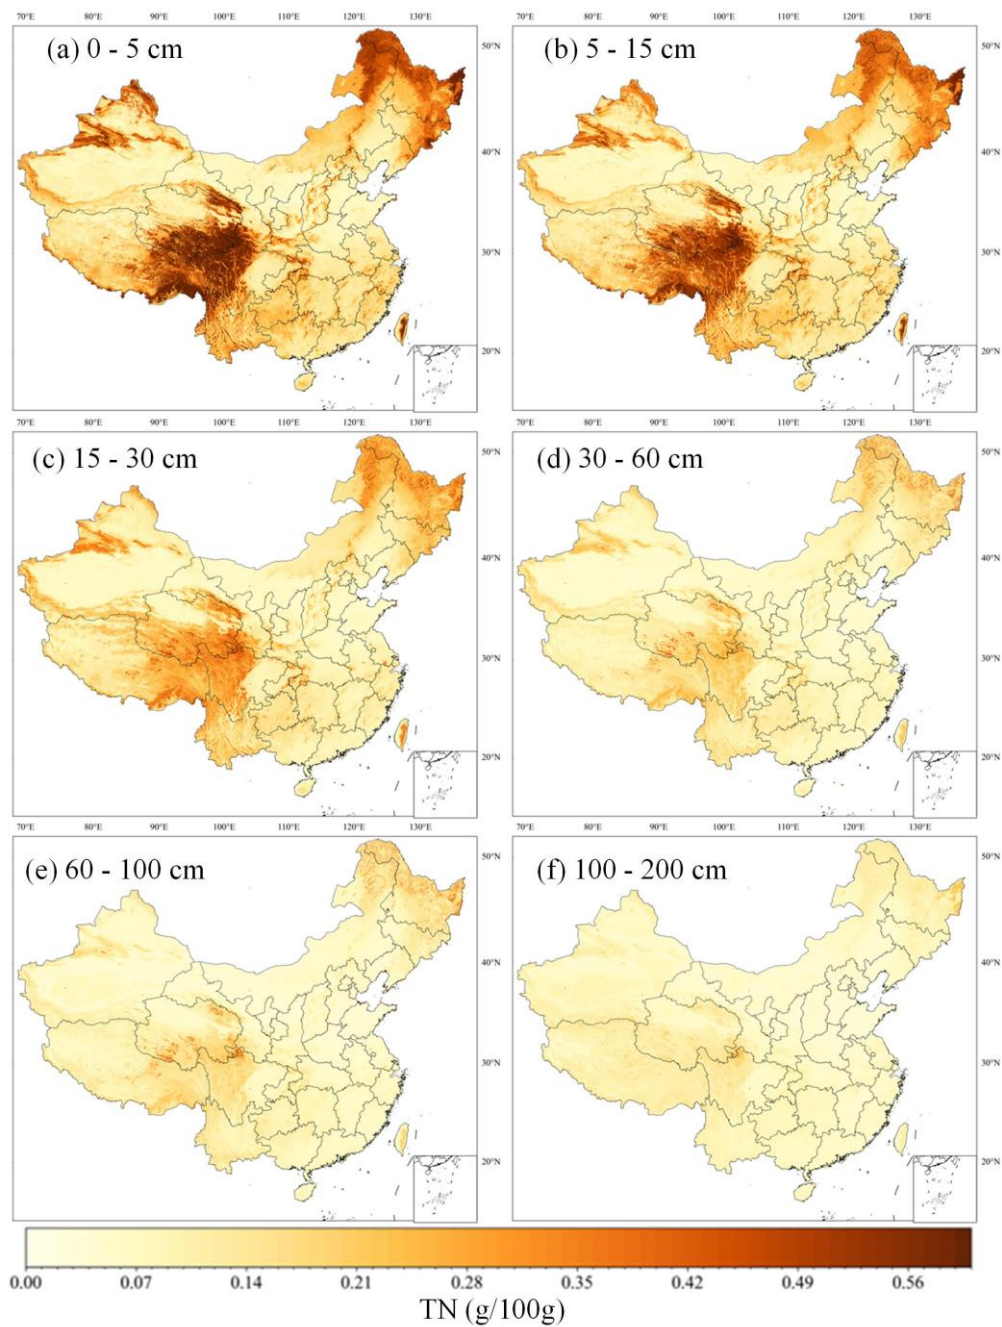

**Figure S49.** The predicted maps of total nitrogen (TN) content at multiple depths (g/100g). (a) 0-5 cm; (b) 5-15 cm; (c) 15-30 cm; (d) 30-60 cm; (e) 60-100 cm and (f) 100-200 cm depth interval.

## S19.2 Accuracy assessment

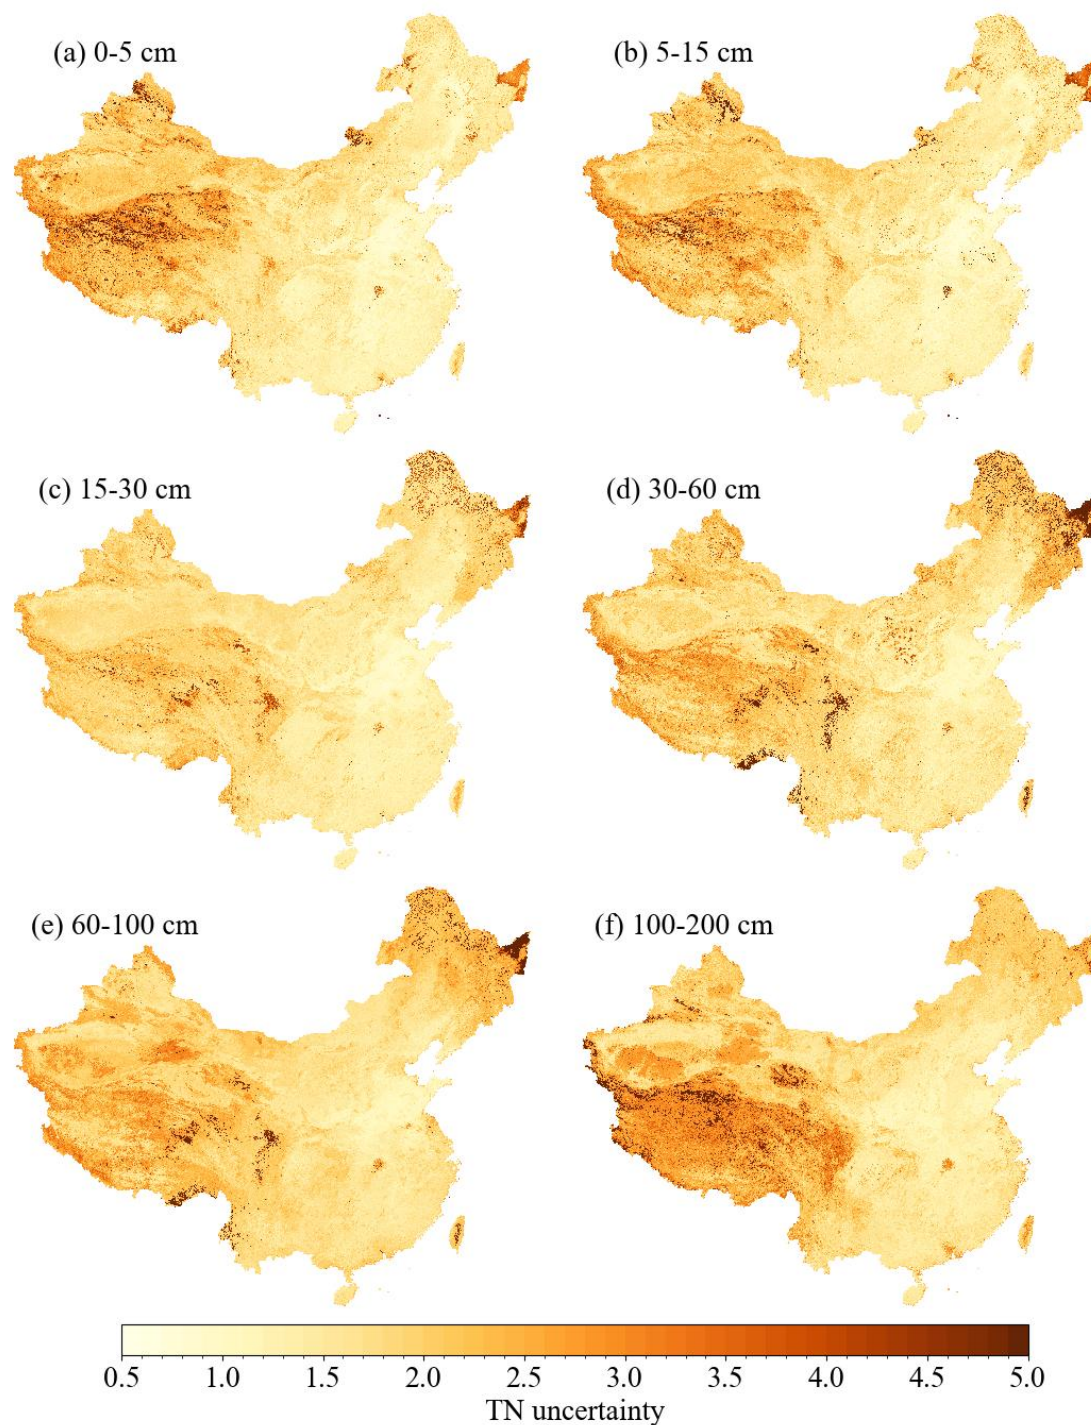

**Figure S50.** The maps of uncertainty of total nitrogen (TN) predictions at the six depth intervals.

### S19.3 Variable importance

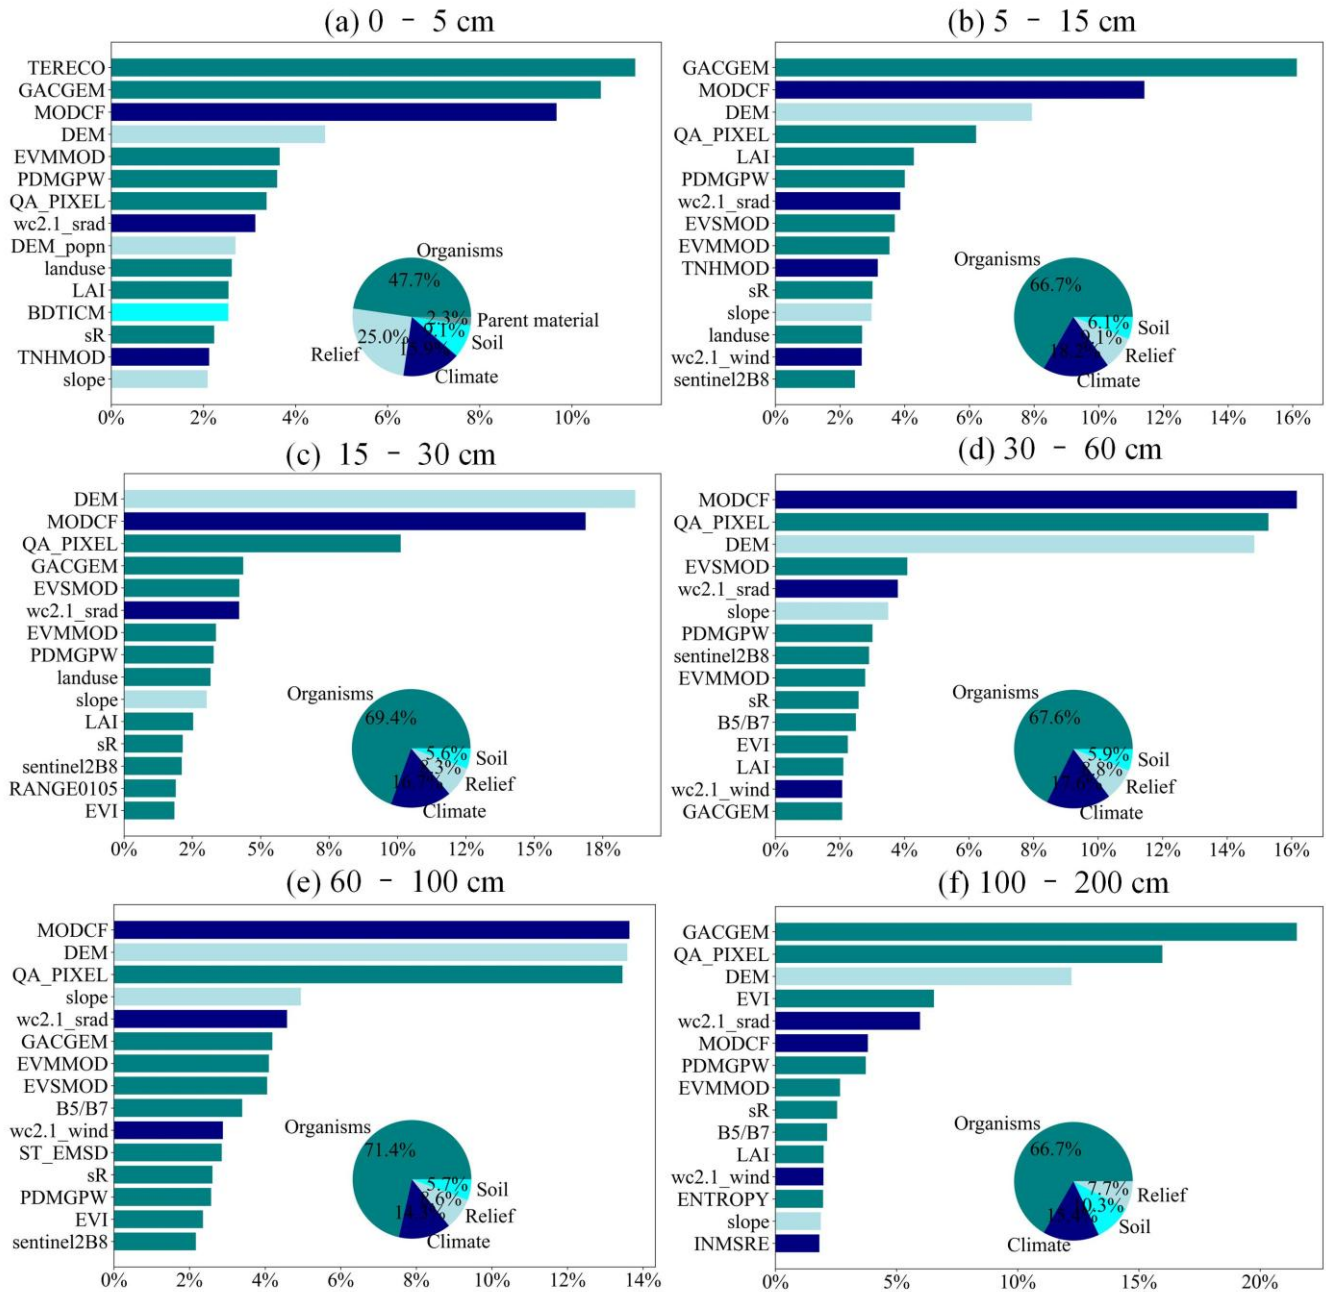

**Figure S51.** Relative importance of the top 15 predictors for the Quantile Regression Forest model in the spatial predictions of total nitrogen (TN) at the six depth intervals. See Table S6 for abbreviations of the environmental covariates.



## S20 Total phosphorus (TP)

### S20.1 Prediction maps

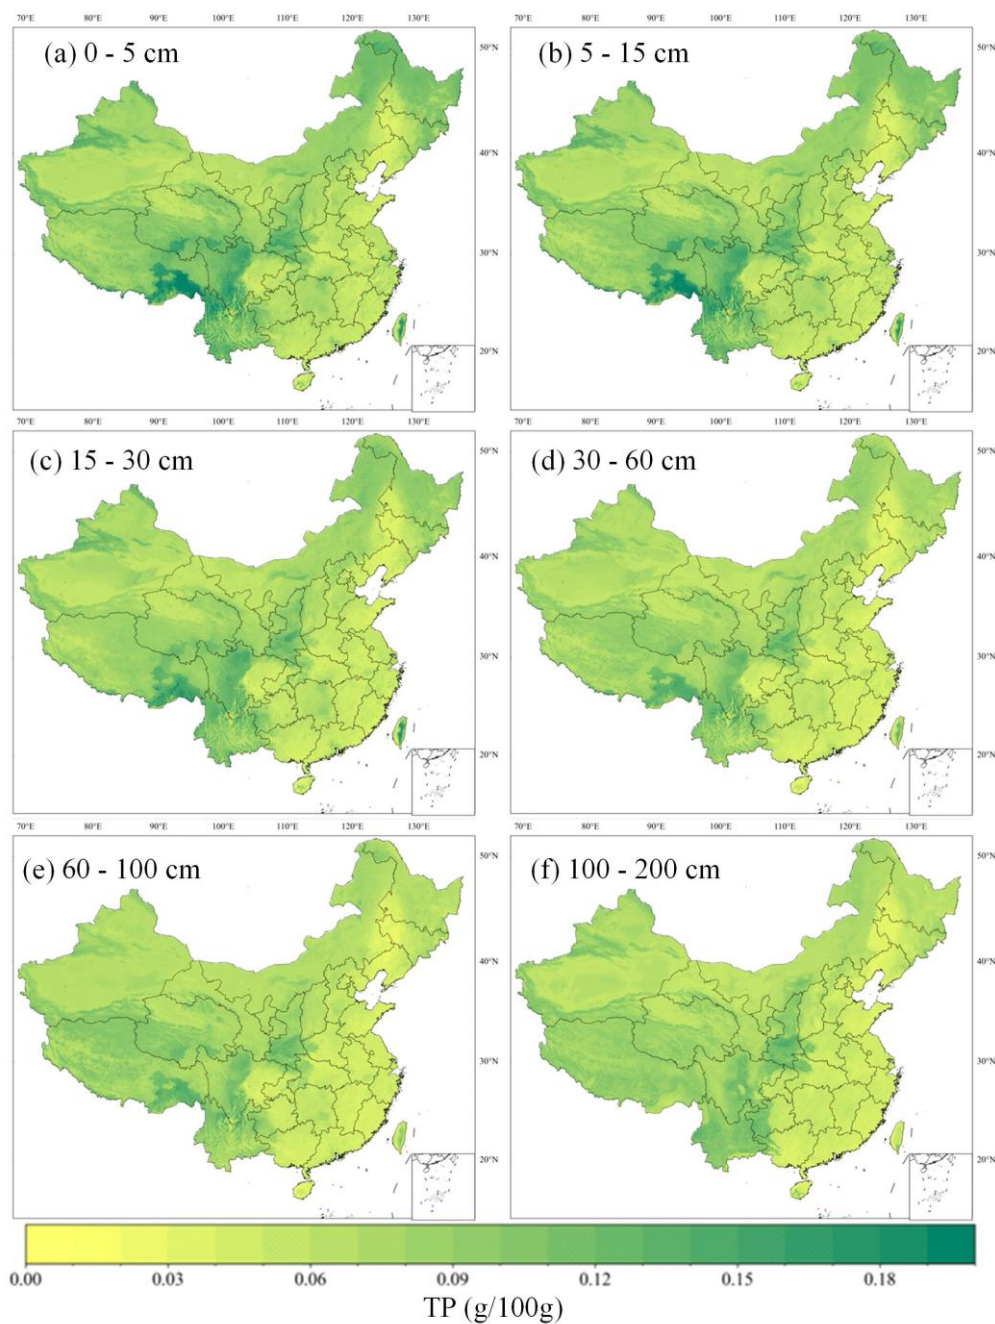

210

**Figure S52.** The predicted maps of total phosphorus (TP) content at multiple depths (g/100g). (a) 0-5 cm; (b) 5-15 cm; (c) 15-30 cm; (d) 30-60 cm; (e) 60-100 cm and (f) 100-200 cm depth interval.

## S20.2 Accuracy assessment

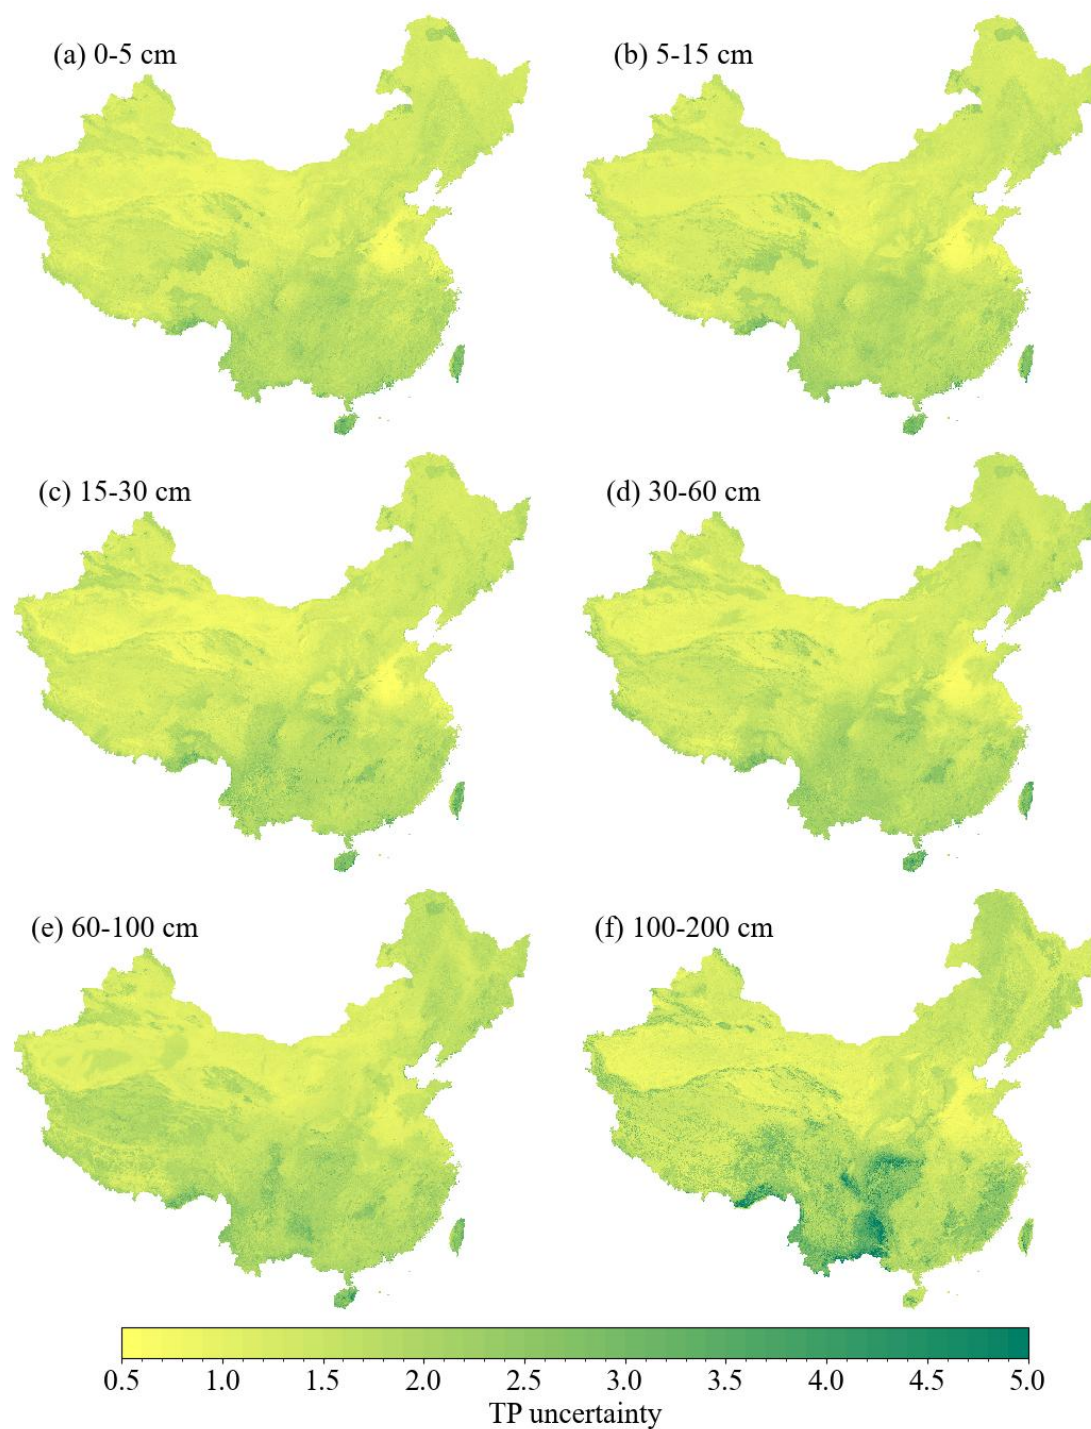

215 **Figure S53.** The maps of uncertainty of total phosphorus (TP) predictions at the six depth intervals.

### S20.3 Variable importance

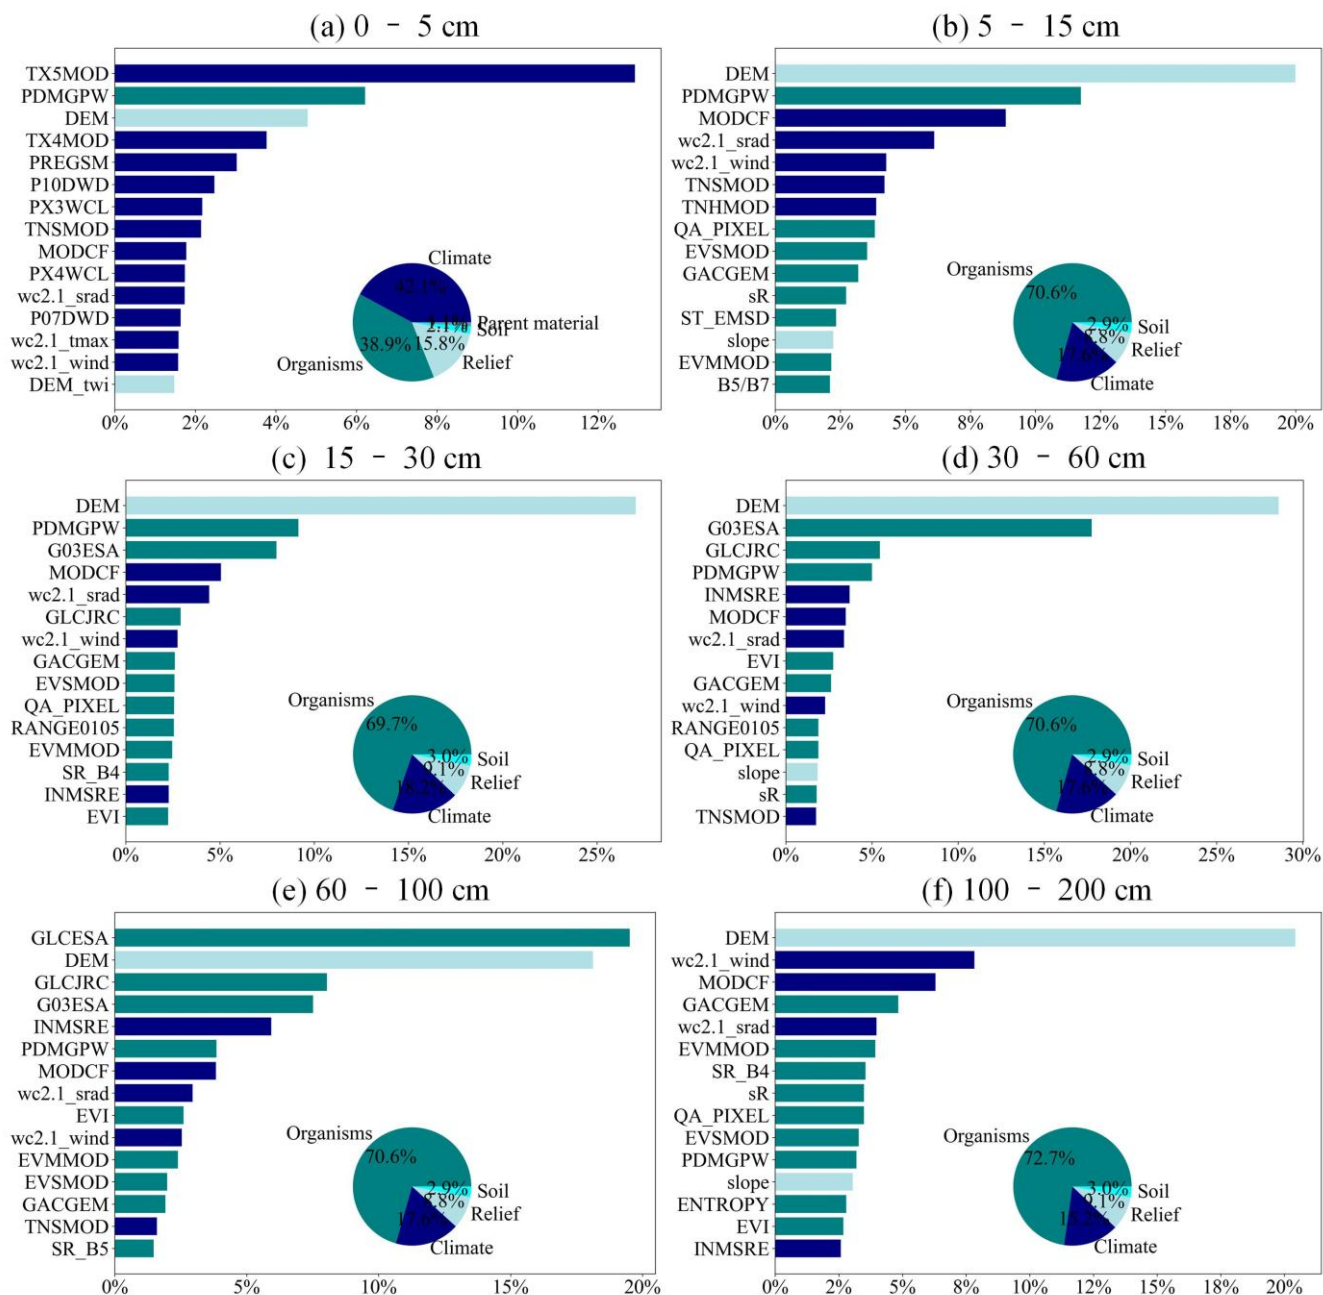

**Figure S54.** Relative importance of the top 15 predictors for the Quantile Regression Forest model in the spatial predictions of total phosphorus (TP) at the six depth intervals. See Table S6 for abbreviations of the environmental covariates.

## S21.1 Prediction maps

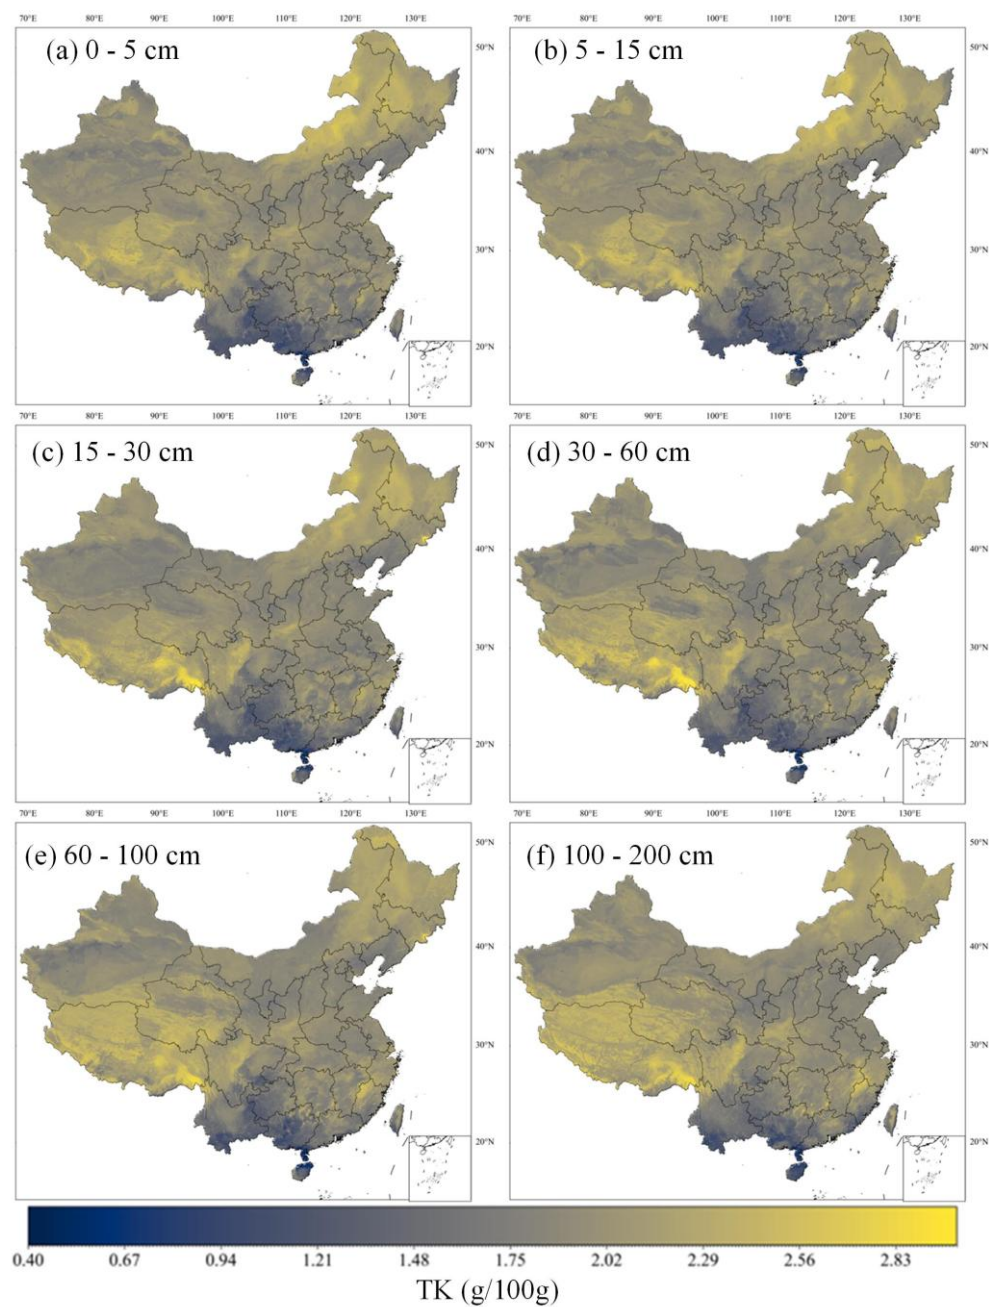

**Figure S55.** The predicted maps of total potassium (TK) content at multiple depths (g/100g). (a) 0-5 cm; (b) 5-15 cm; (c) 15-30 cm; (d) 30-60 cm; (e) 60-100 cm and (f) 100-200 cm depth interval.

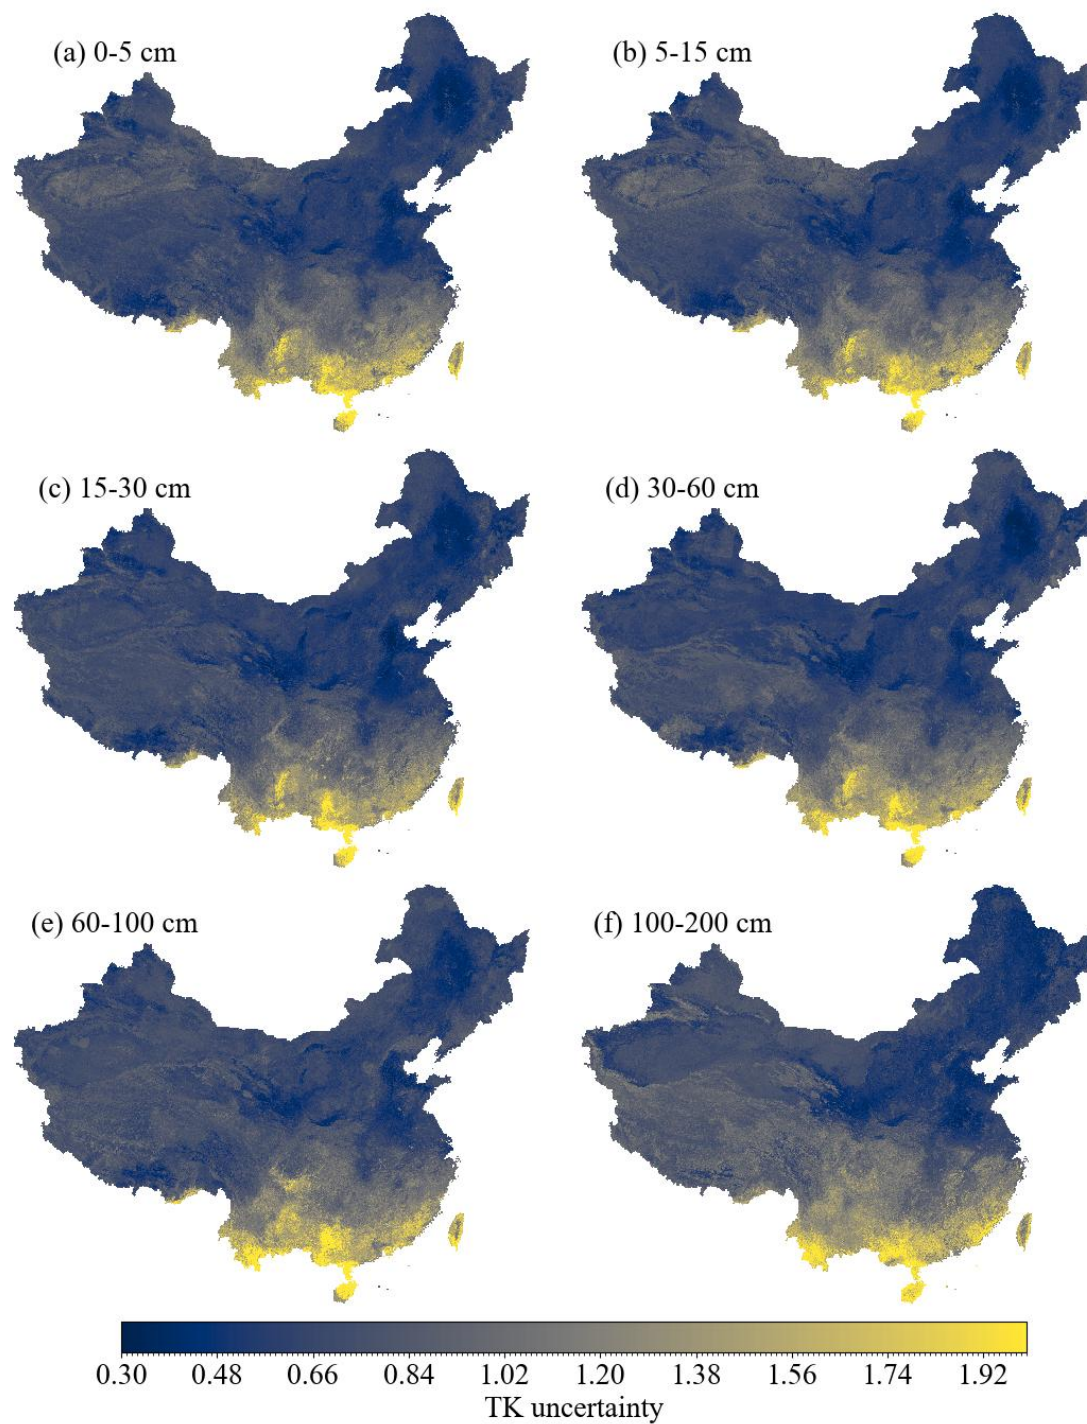

**Figure S56.** The maps of uncertainty of total potassium (TK) predictions at the six depth intervals.

### S21.3 Variable importance

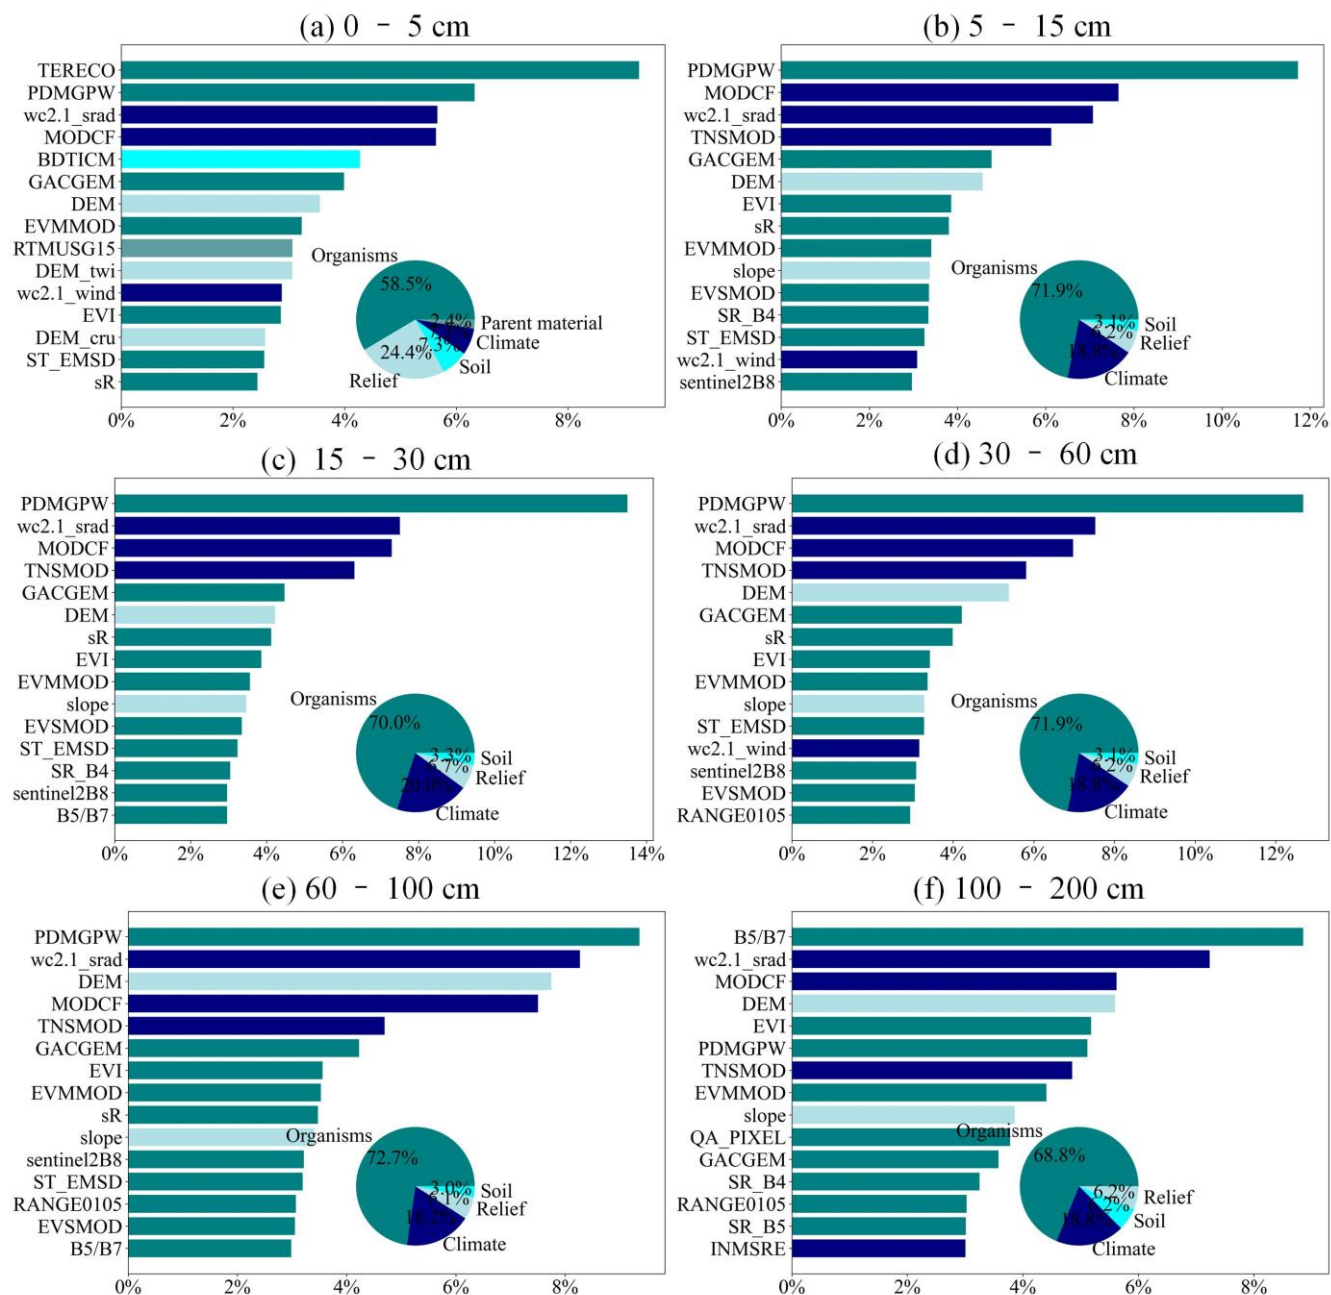

230 **Figure S57.** Relative importance of the top 15 predictors for the Quantile Regression Forest model in the spatial predictions of total potassium (TK) at the six depth intervals. See Table S6 for abbreviations of the environmental covariates.

## S22 Alkali-hydrolysable nitrogen (AN)

### S22.1 Prediction maps

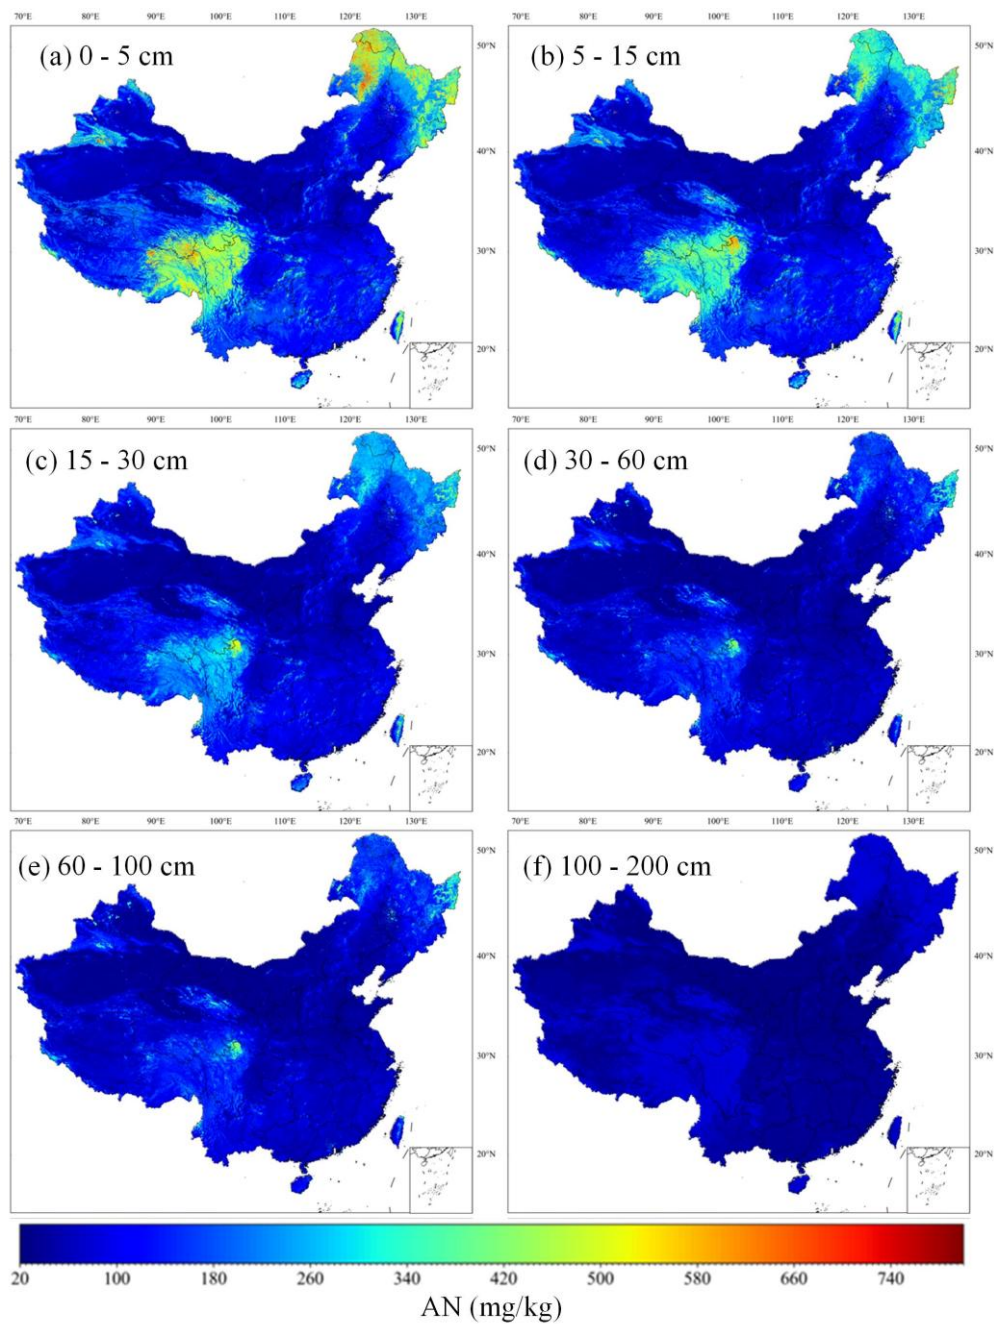

235 **Figure S58.** The predicted maps of alkali-hydrolysable nitrogen (AN) content at multiple depths (mg/kg). (a) 0-5 cm; (b) 5-15 cm; (c) 15-30 cm; (d) 30-60 cm; (e) 60-100 cm and (f) 100-200 cm depth interval.

## S22.2 Accuracy assessment

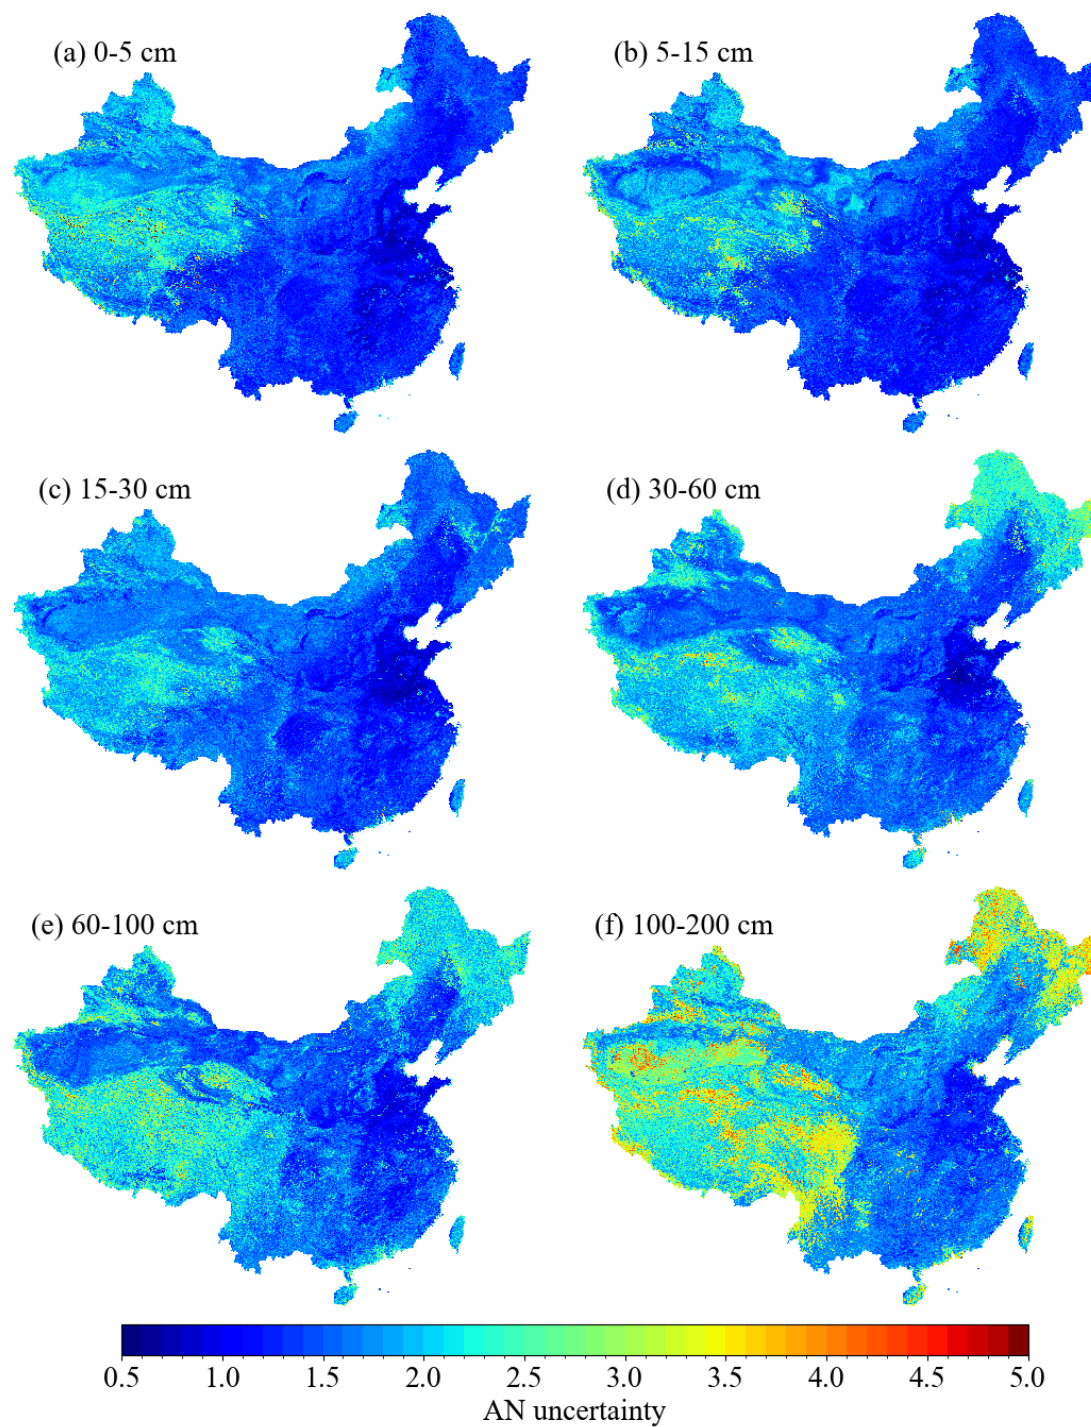

**Figure S59.** The maps of uncertainty of alkali-hydrolysable nitrogen (AN) predictions at the six depth intervals.



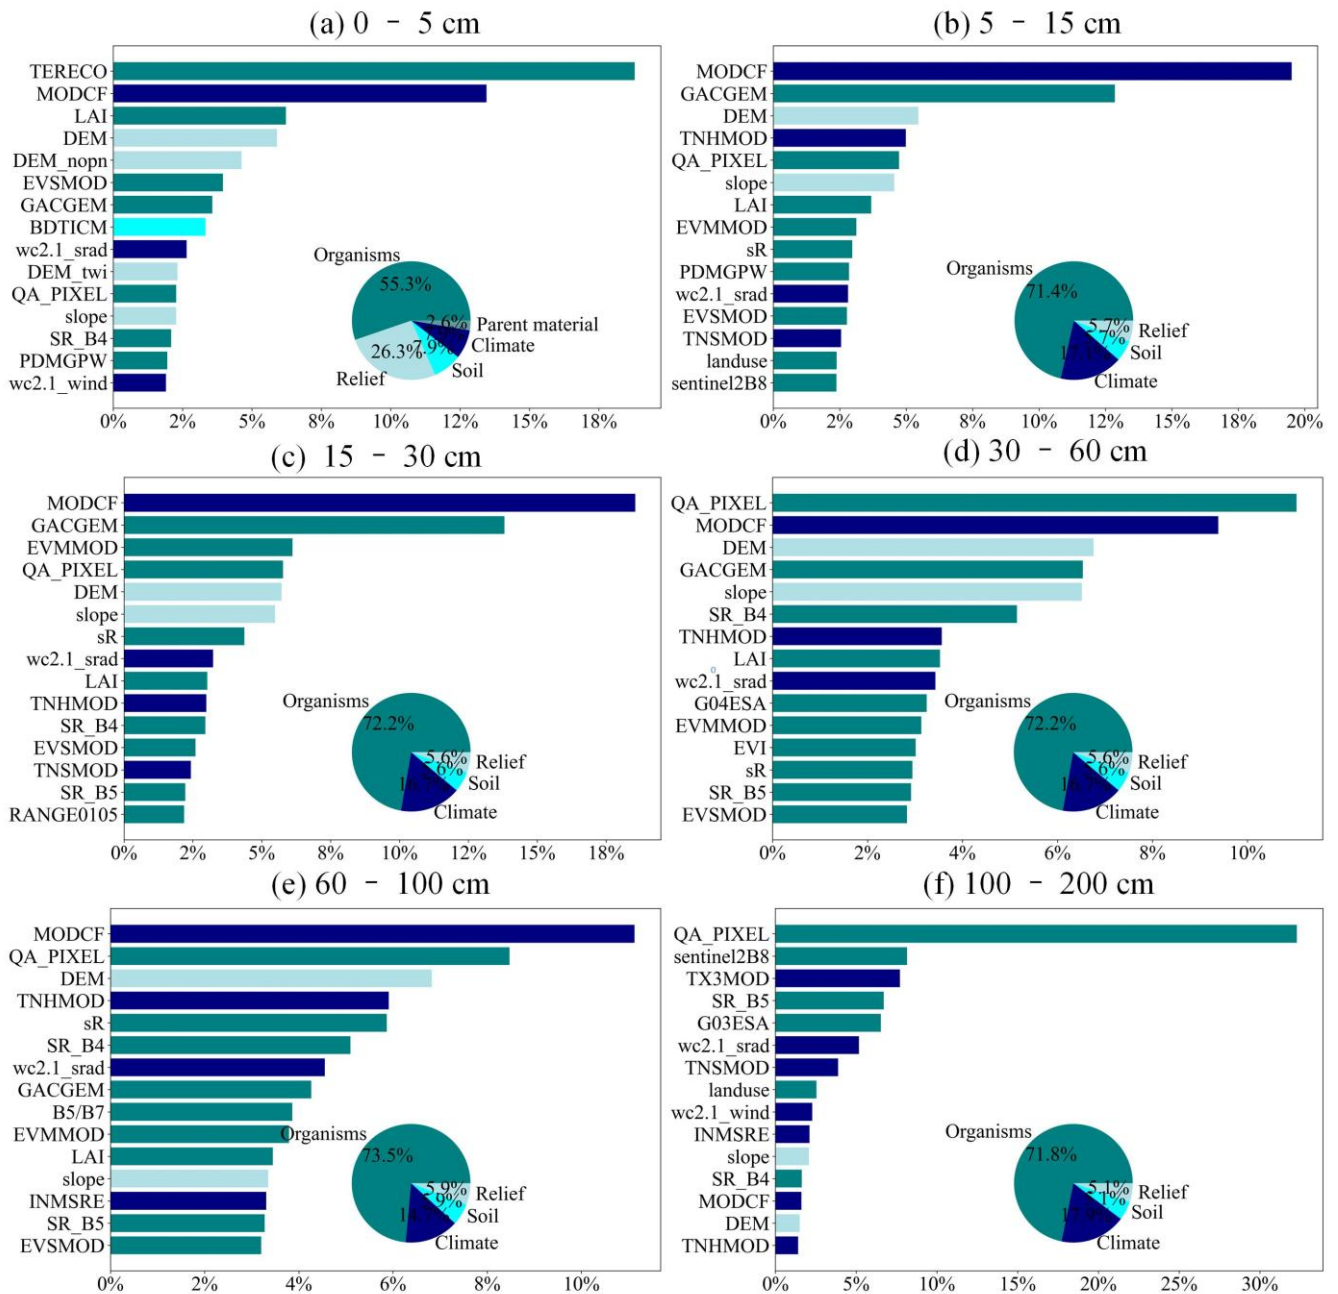

**Figure S60.** Relative importance of the top 15 predictors for the Quantile Regression Forest model in the spatial predictions of alkali-hydrolysable nitrogen (AN) at the six depth intervals. See Table S6 for abbreviations of the environmental covariates.

## S23 Available potassium (AK)

### 245 S23.1 Prediction maps

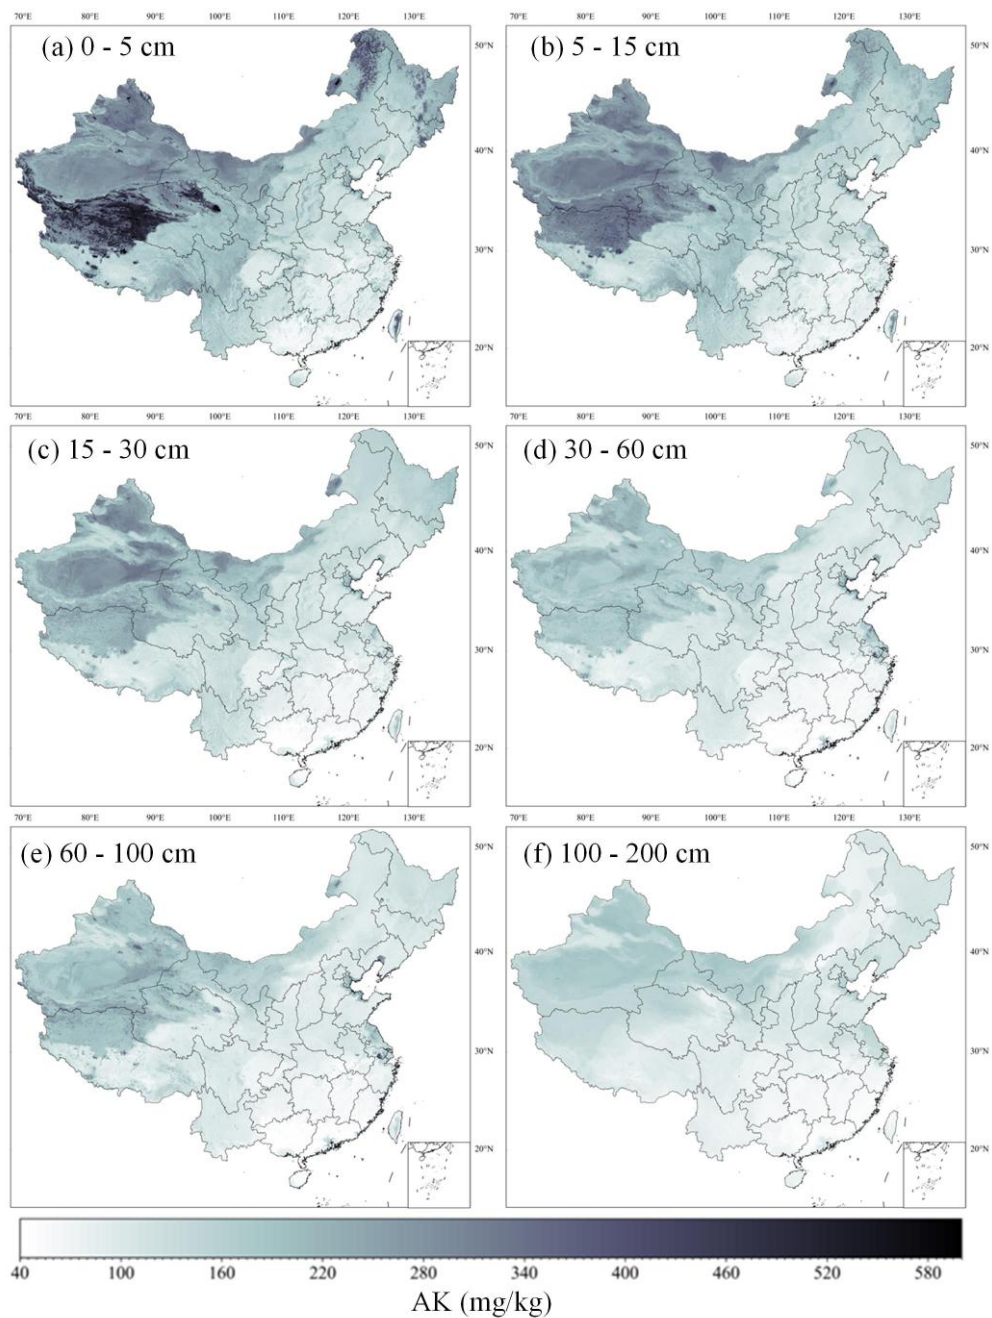

**Figure S61.** The predicted maps of available potassium (AK) content at multiple depths (mg/kg). (a) 0-5 cm; (b) 5-15 cm; (c) 15-30 cm; (d) 30-60 cm; (e) 60-100 cm and (f) 100-200 cm depth interval.

## S23.2 Accuracy assessment

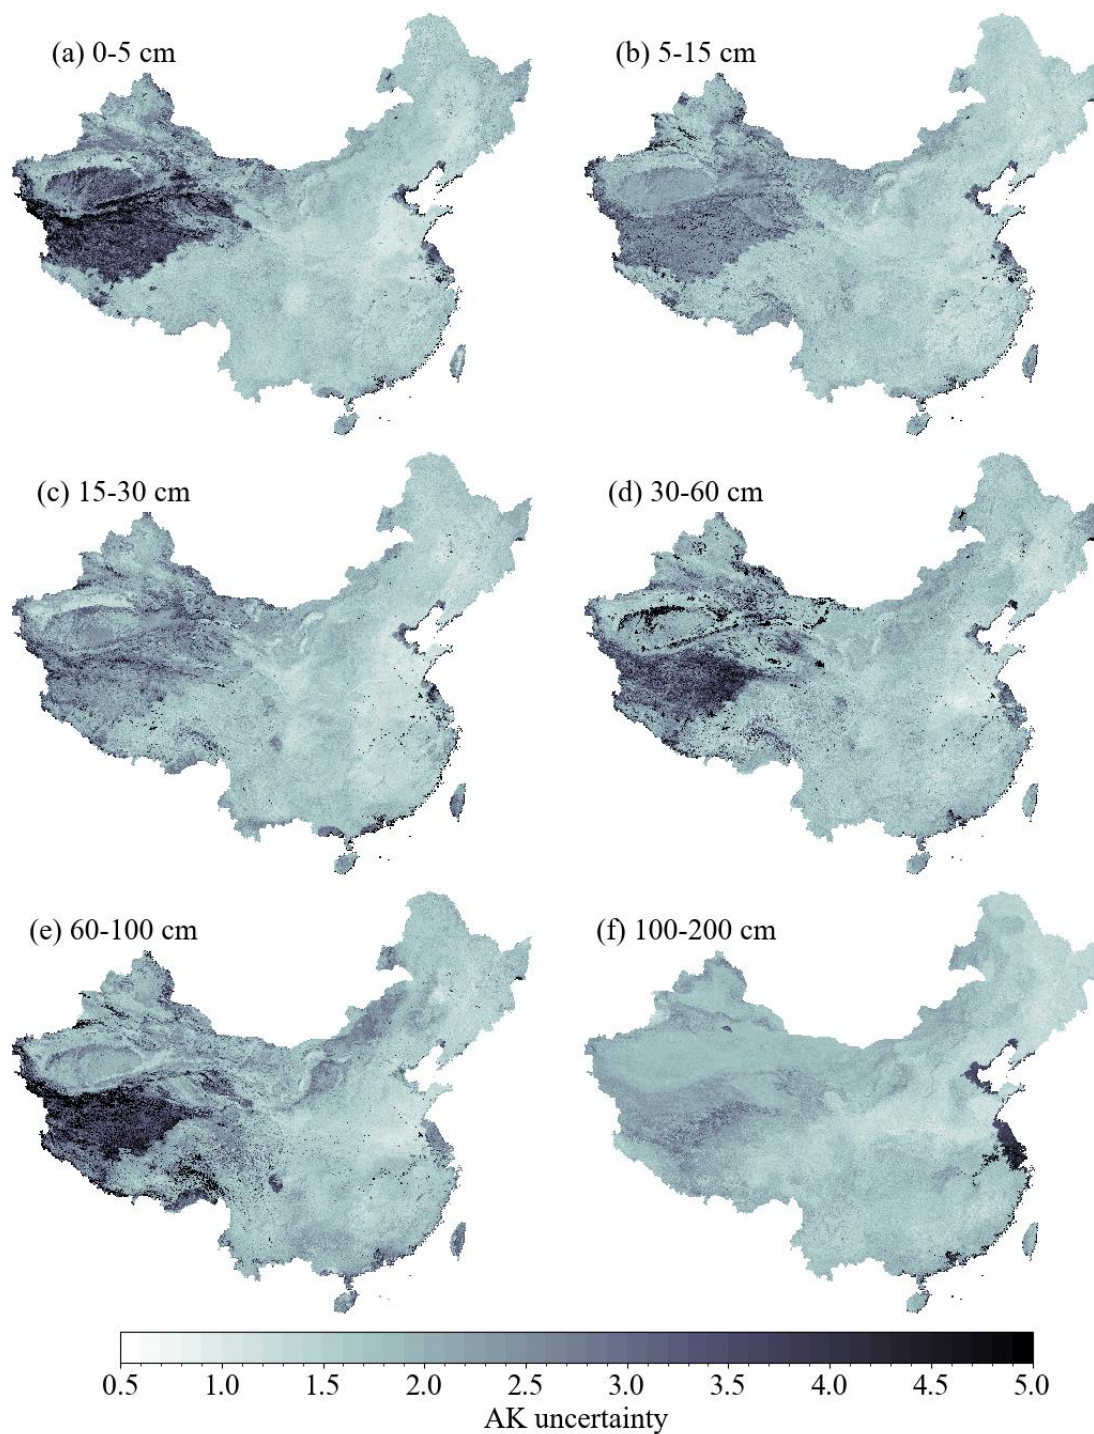

250

**Figure S62.** The maps of uncertainty of available potassium (AK) predictions at the six depth intervals.

### S23.3 Variable importance

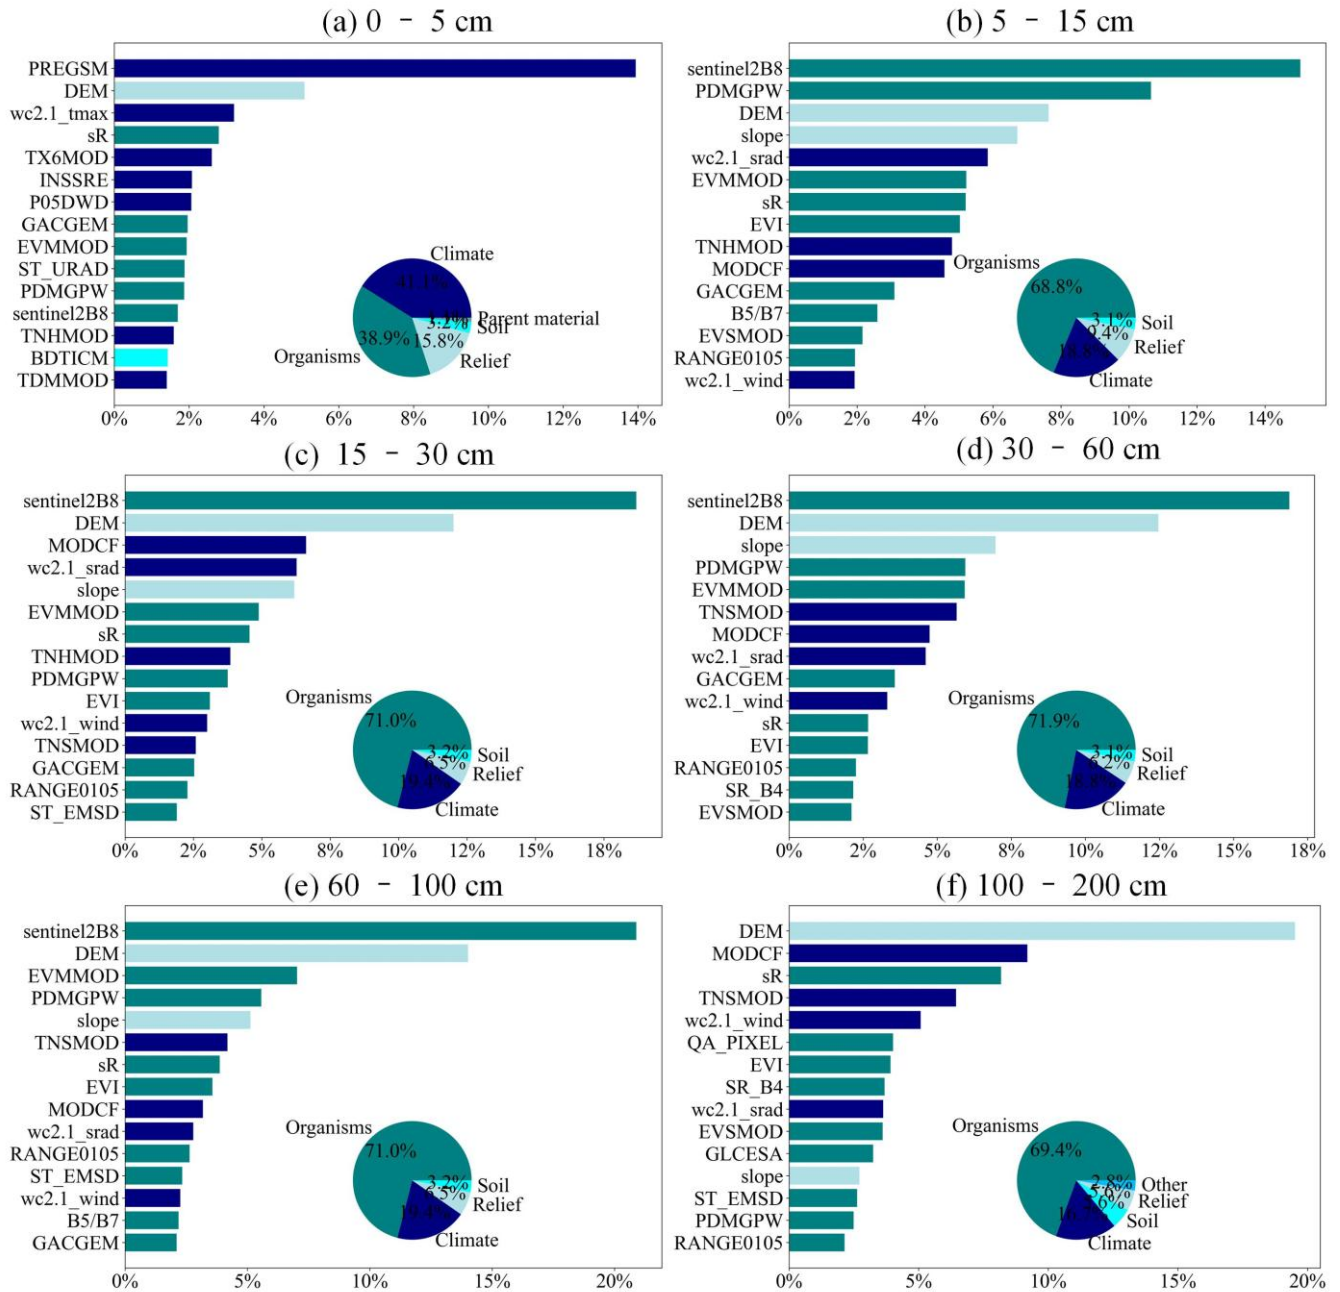

255 **Figure S63.** Relative importance of the top 15 predictors for the Quantile Regression Forest model in the spatial predictions of available potassium (AK) at the six depth intervals. See Table S6 for abbreviations of the environmental covariates.

## S24 Available phosphorus (AP)

### S24.1 Prediction maps

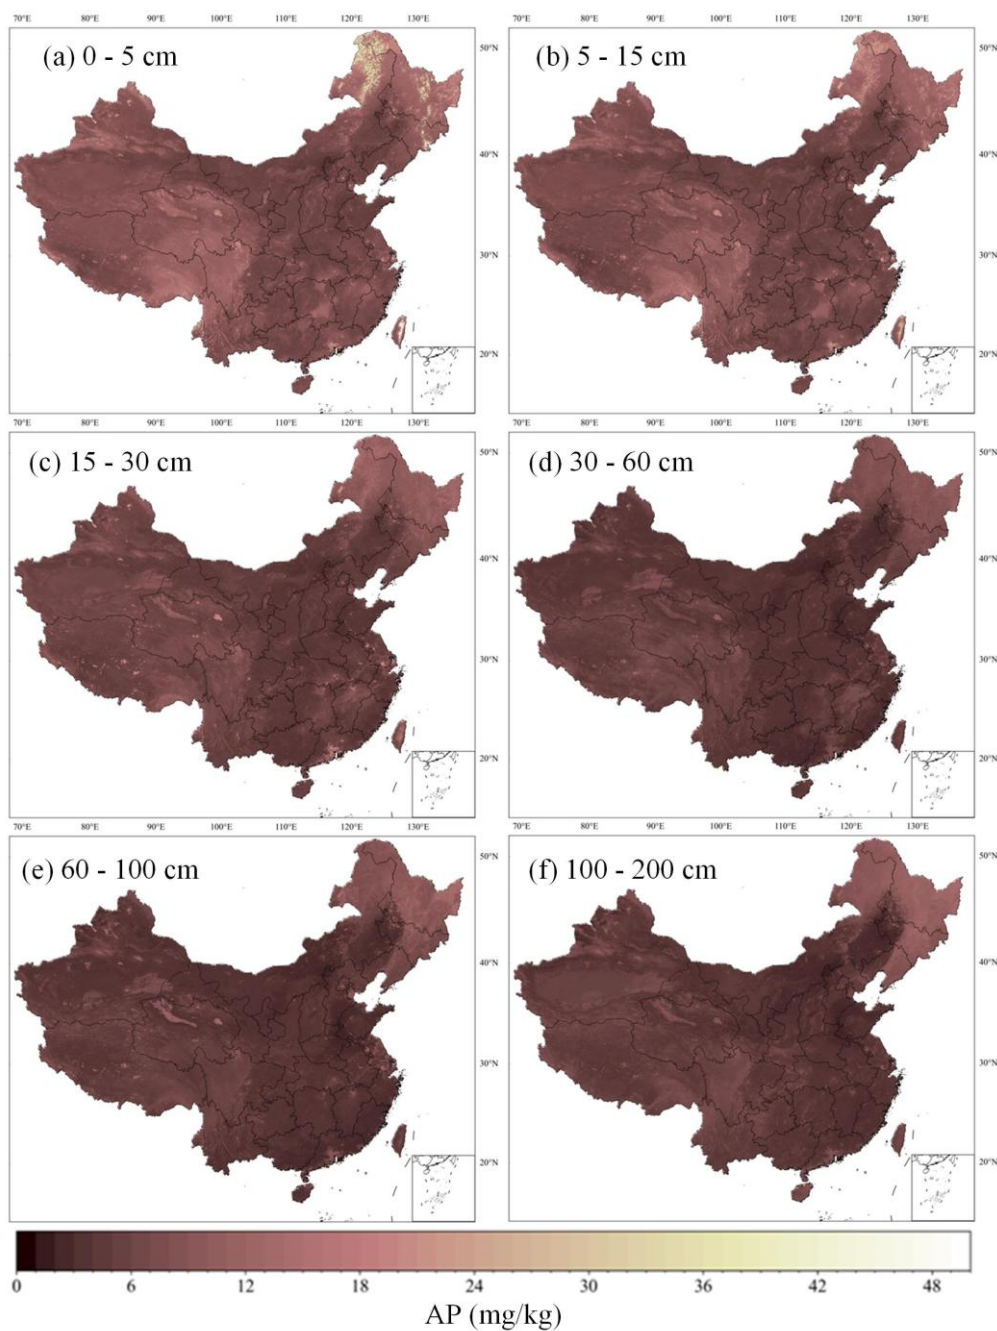

260 **Figure S64.** The predicted maps of available phosphorus (AP) content at multiple depths (mg/kg). (a) 0-5 cm; (b) 5-15 cm; (c) 15-30 cm; (d) 30-60 cm; (e) 60-100 cm and (f) 100-200 cm depth interval.

## S24.2 Accuracy assessment

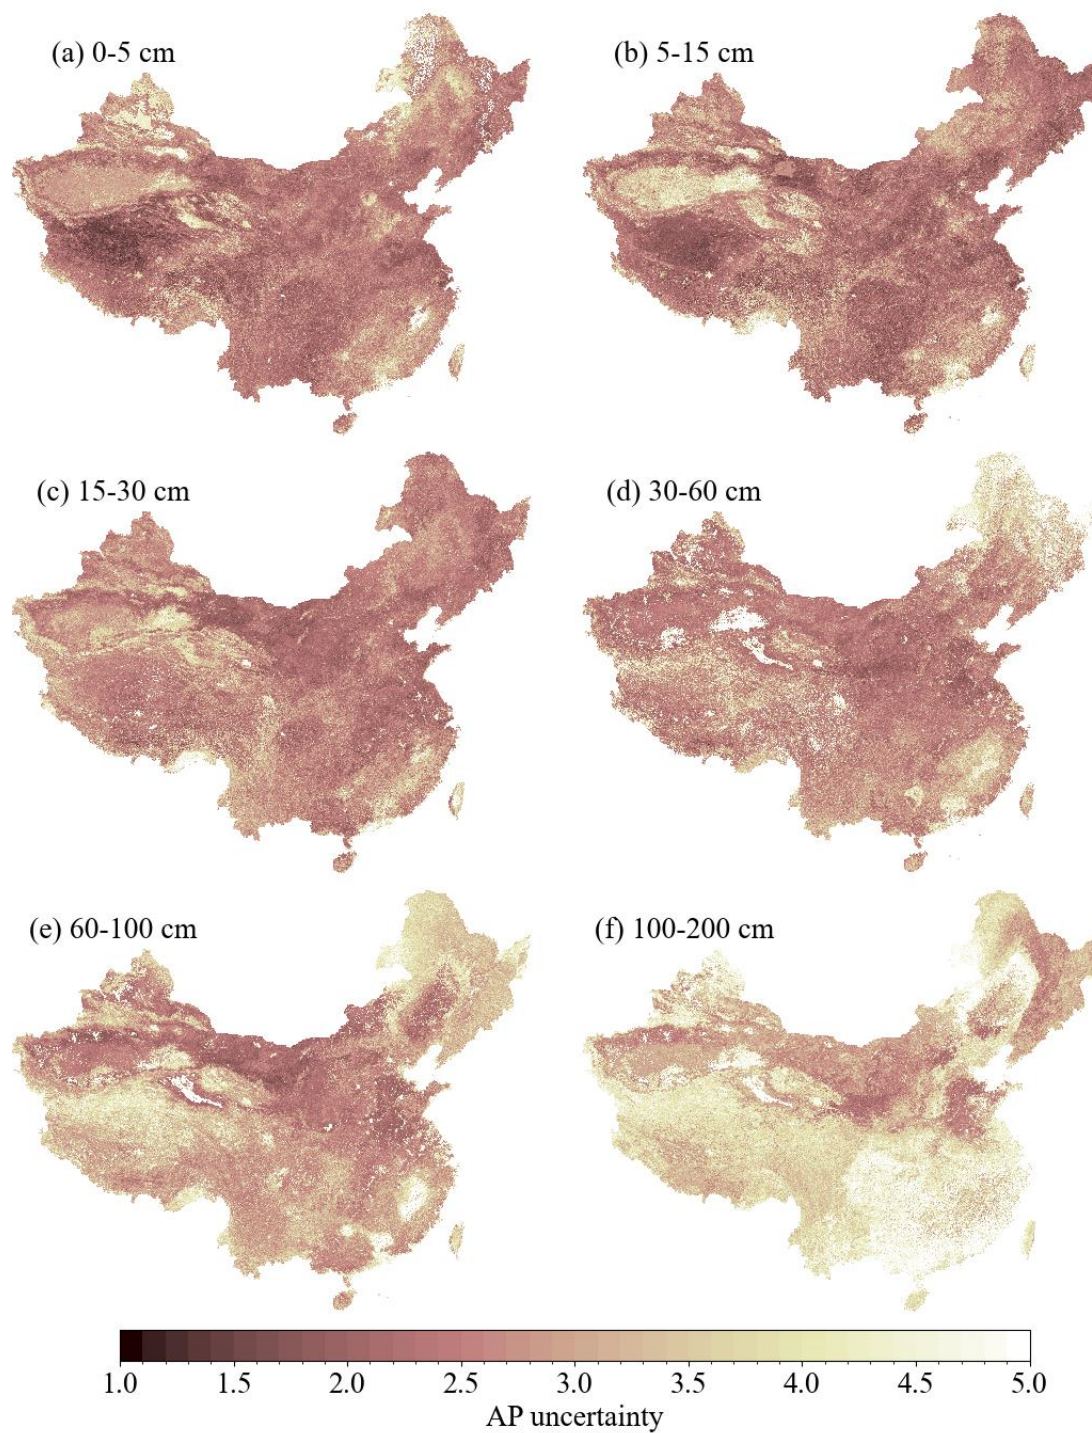

**Figure S65.** The maps of uncertainty of available phosphorus (AP) predictions at the six depth intervals.

### S24.3 Variable importance

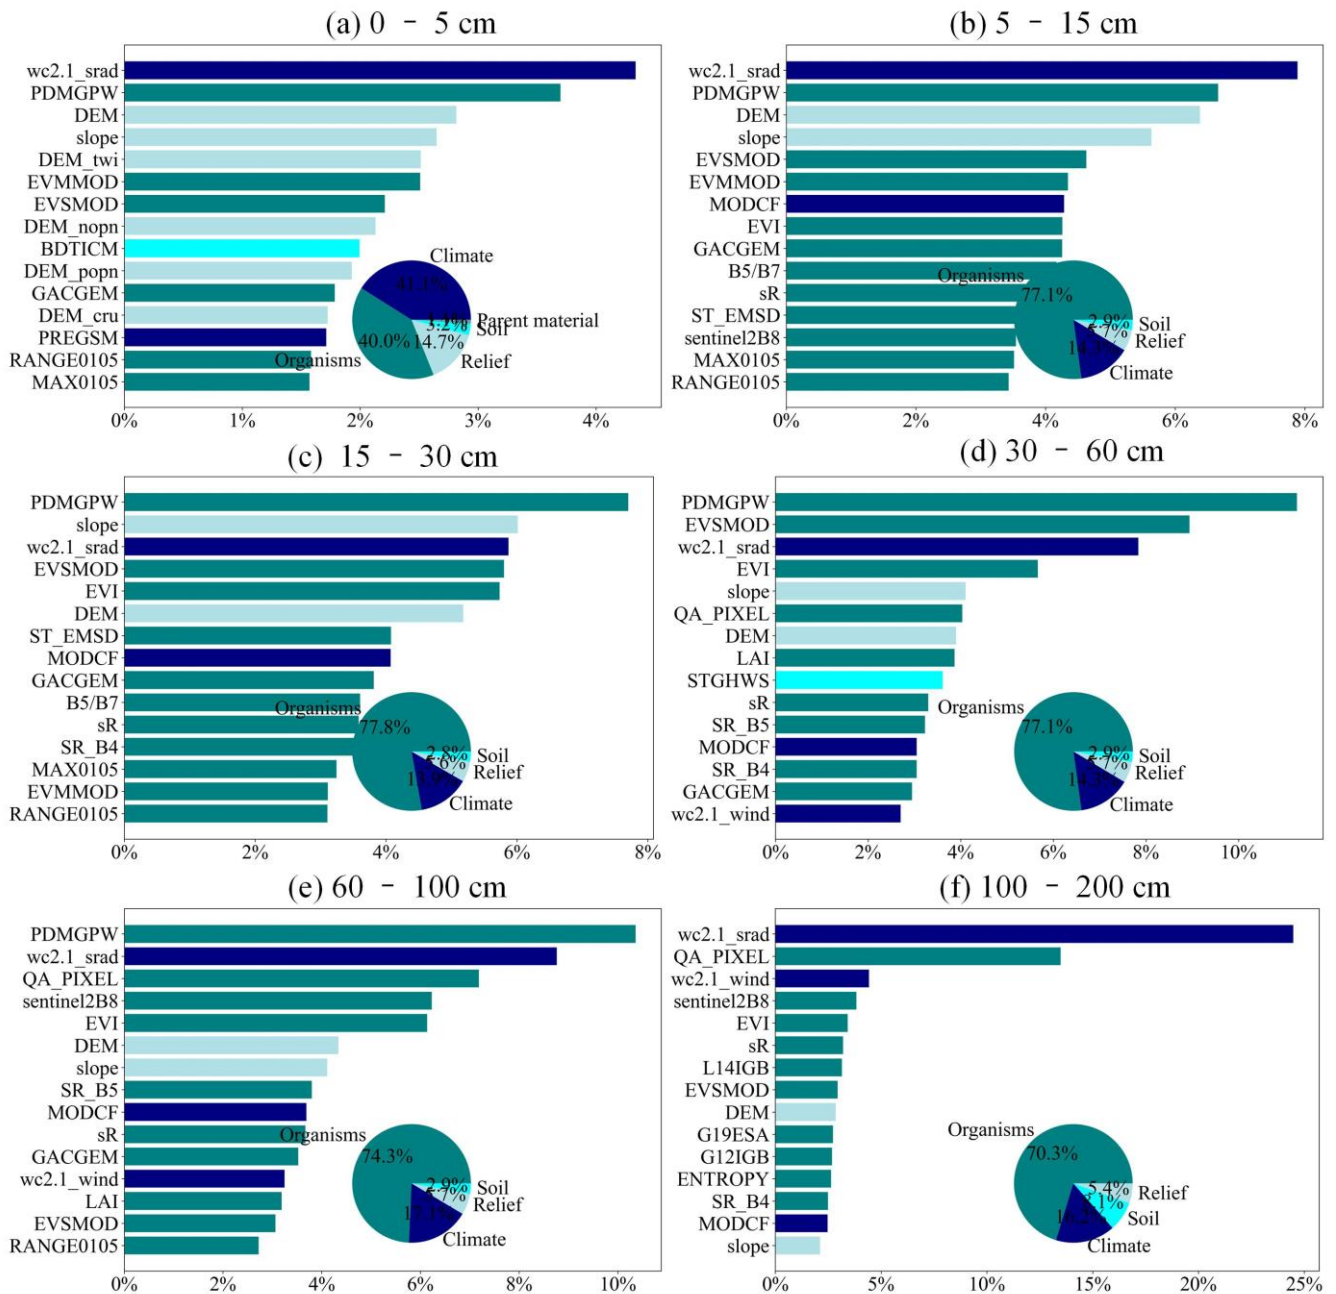

**Figure S66.** Relative importance of the top 15 predictors for the Quantile Regression Forest model in the spatial predictions of available phosphorus (AP) at the six depth intervals. See Table S6 for abbreviations of the environmental covariates.

## S25 Spatial details of total nitrogen (TN)

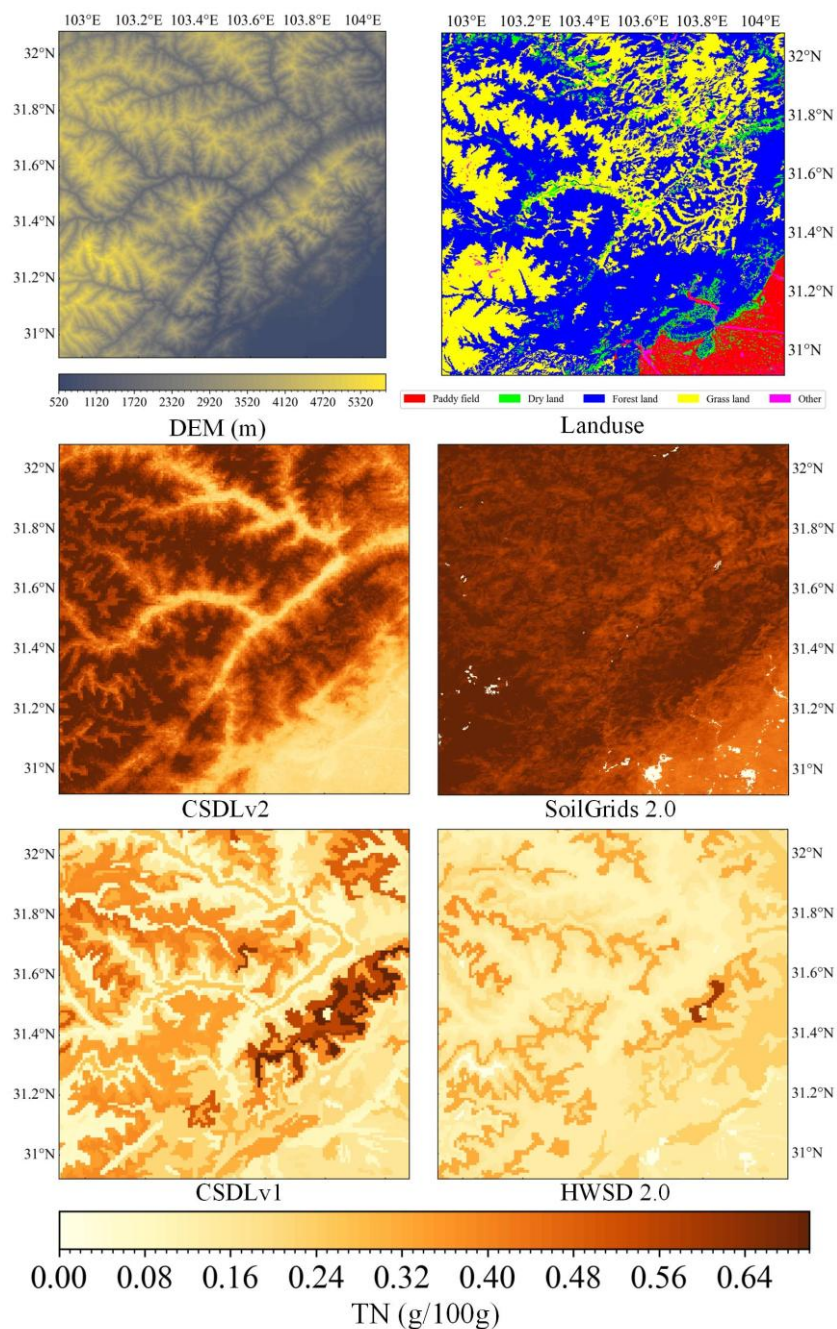

270 **Figure S67.** Surface layer (0-5cm) total nitrogen (TN) maps derived from our predictions (CSDLv2), SoilGrids 2.0, CSDLv1, and HWSD 2.0, respectively, in a selected area (102.92°-104.08°E and 30.92°-32.08°N) located in Sichuan Province. This selected area corresponds to the red window shown in Figure 1. DEM and landuse refer to the land surface elevation and land use type of the selected area, respectively. The spatial resolutions are 90 m for CSDLv2, 250 m for SoilGrids 2.0, and 1 km for both CSDLv1 and HWSD 2.0.



## S26 Spatial details of rock fragment (gravel)

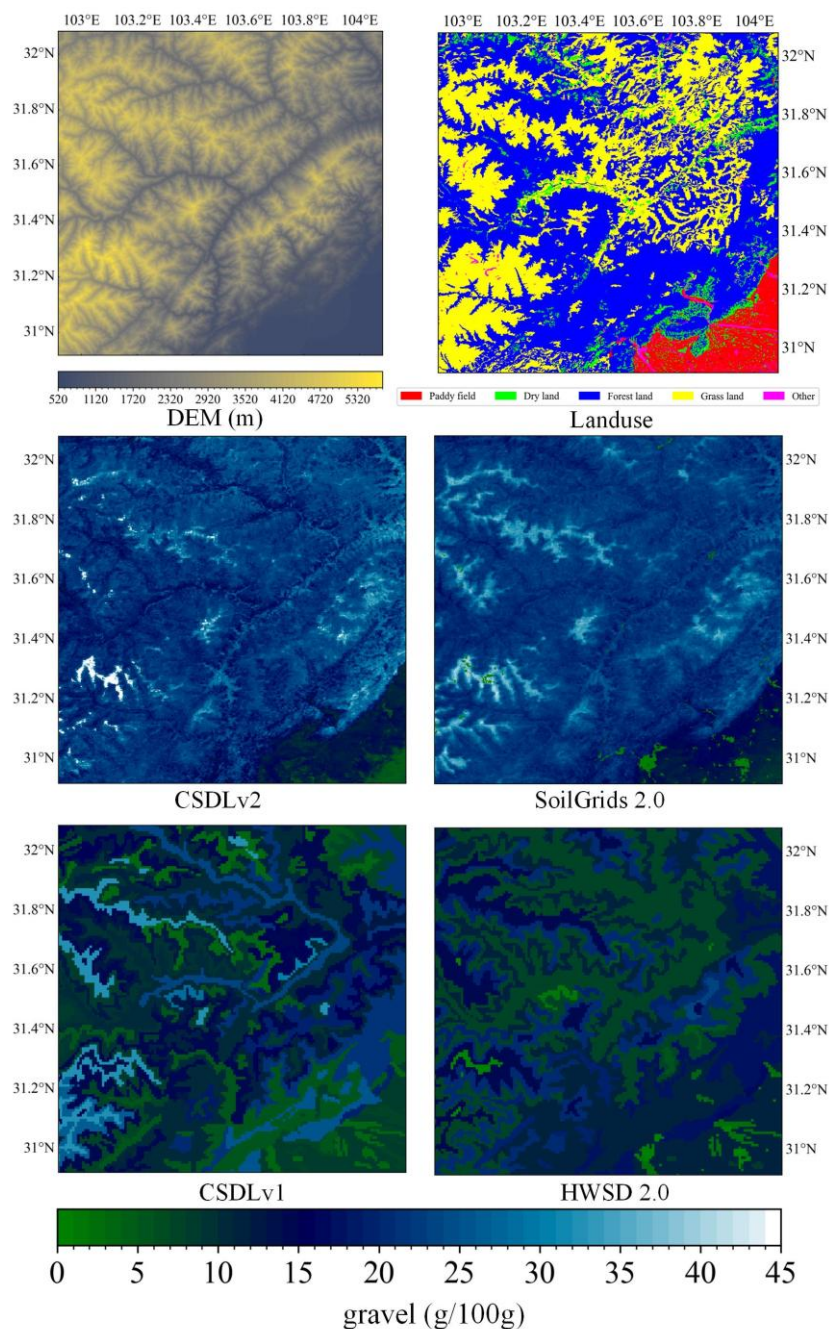

275

**Figure S68.** Surface layer (0-5cm) rock fragment (gravel) maps derived from our predictions (CSDLv2), SoilGrids 2.0, CSDLv1, and HWSD 2.0, respectively, in a selected area (102.92°-104.08°E and 30.92°-32.08°N) located in Sichuan province. This selected area corresponds to the red window shown in Figure 1. DEM and landuse refer to the land surface elevation and land use type of the selected area, respectively. The spatial resolutions are 90 m for CSDLv2, 250 m for SoilGrids 2.0, and 1 km for both CSDLv1 and HWSD 2.0.

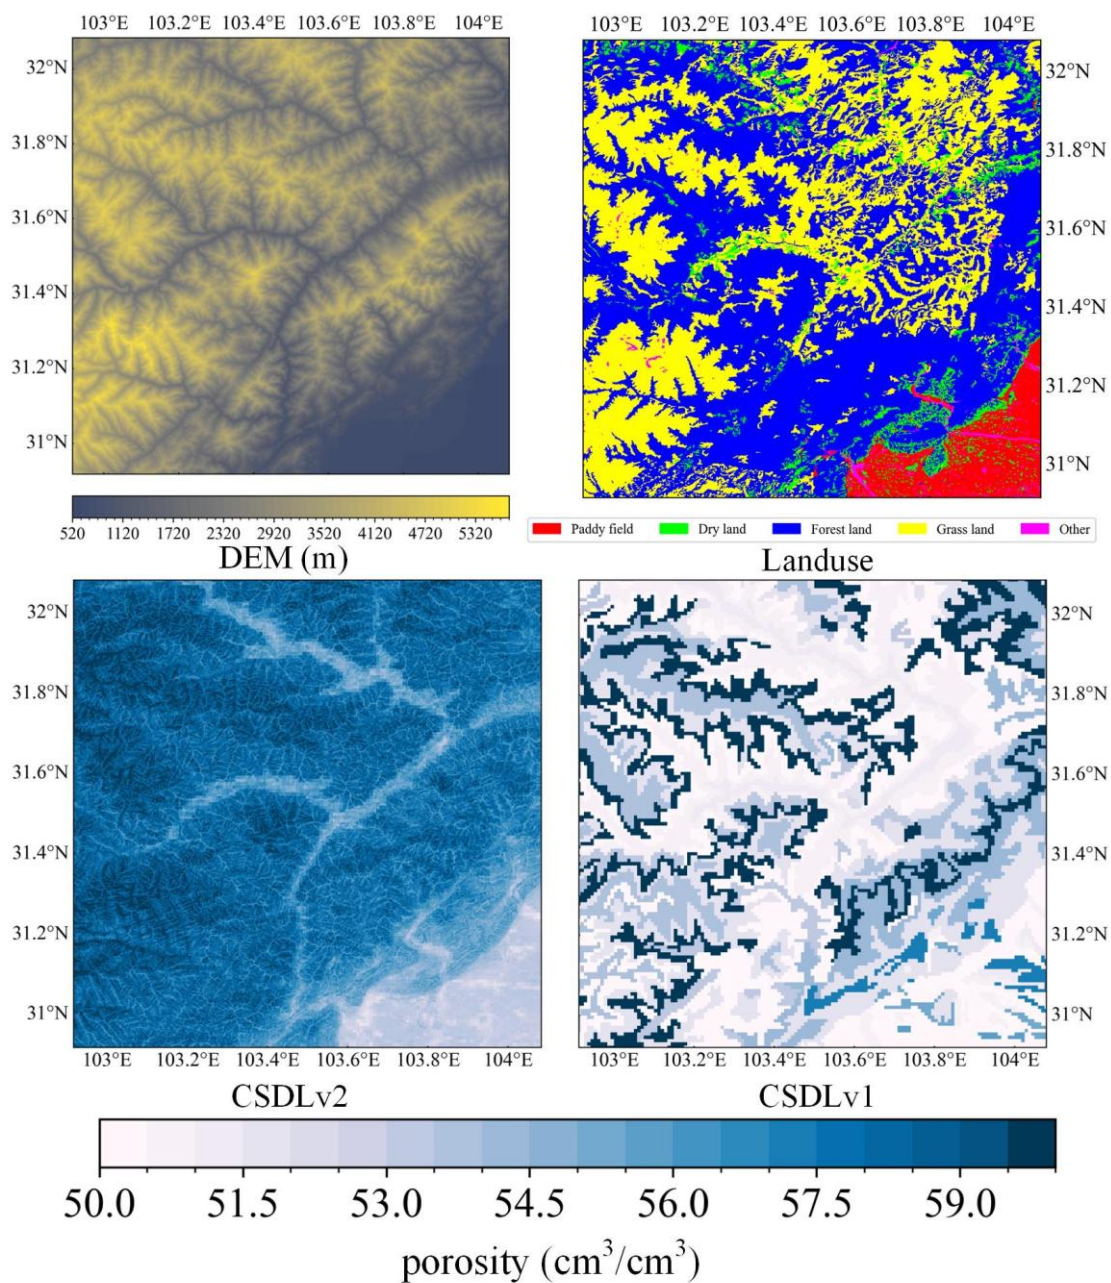

**Figure S69.** Surface layer (0-5 cm) porosity maps derived from our predictions (CSDLv2) and CSDLv1, respectively, in a selected area (102.92°-104.08°E and 30.92°-32.08°N) located in Sichuan province. This selected area corresponds to the red window shown in Figure 1. DEM and land use refer to the land surface elevation and land use type of the selected area, respectively. The spatial resolutions are 90 m for CSDLv2 and 1 km for CSDLv1. Note that porosity data is not available in SoilGrids 2.0 and HWSO 2.0, therefore no visualizations are provided for these datasets.

## S28 Spatial details of alkali-hydrolysable nitrogen (AN)

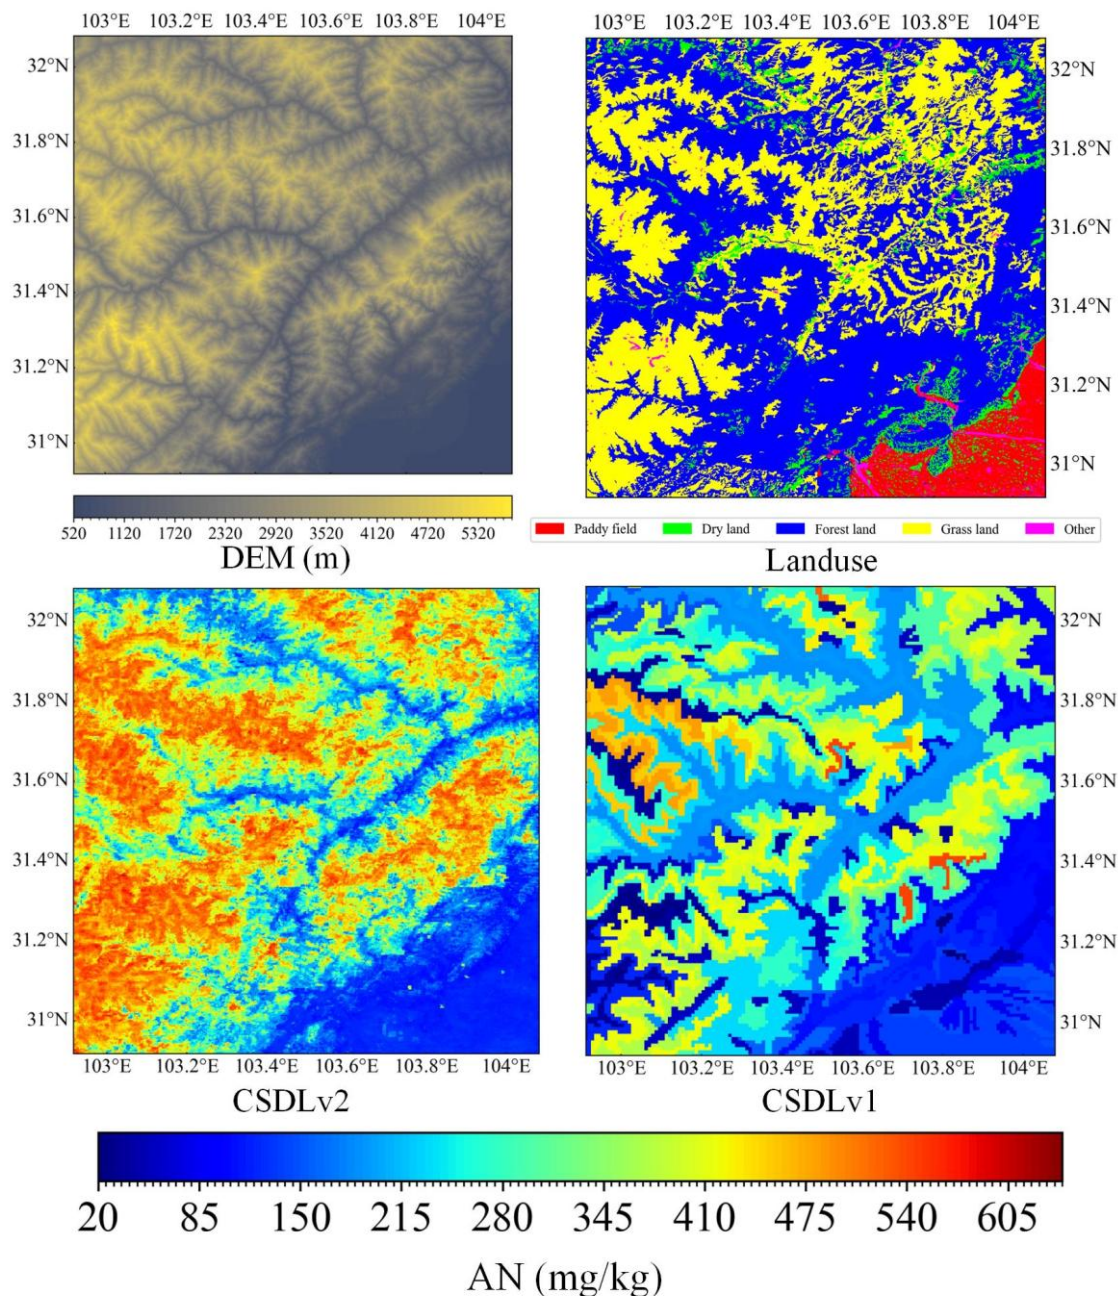

290 **Figure S70.** Surface layer (0-5 cm) alkali-hydrolysable nitrogen (AN) maps derived from our predictions (CSDLv2) and CSDLv1, respectively, in a selected area (102.92°-104.08°E and 30.92°-32.08°N) located in Sichuan province. This selected area corresponds to the red window shown in Figure 1. DEM and land use refer to the land surface elevation and land use type of the selected area, respectively. The spatial resolutions are 90 m for CSDLv2 and 1 km for CSDLv1. Note that AN data is not available in SoilGrids 2.0 and HWSD 2.0, therefore no visualizations are provided for these datasets.

## S29 Spatial details of available phosphorus (AP)

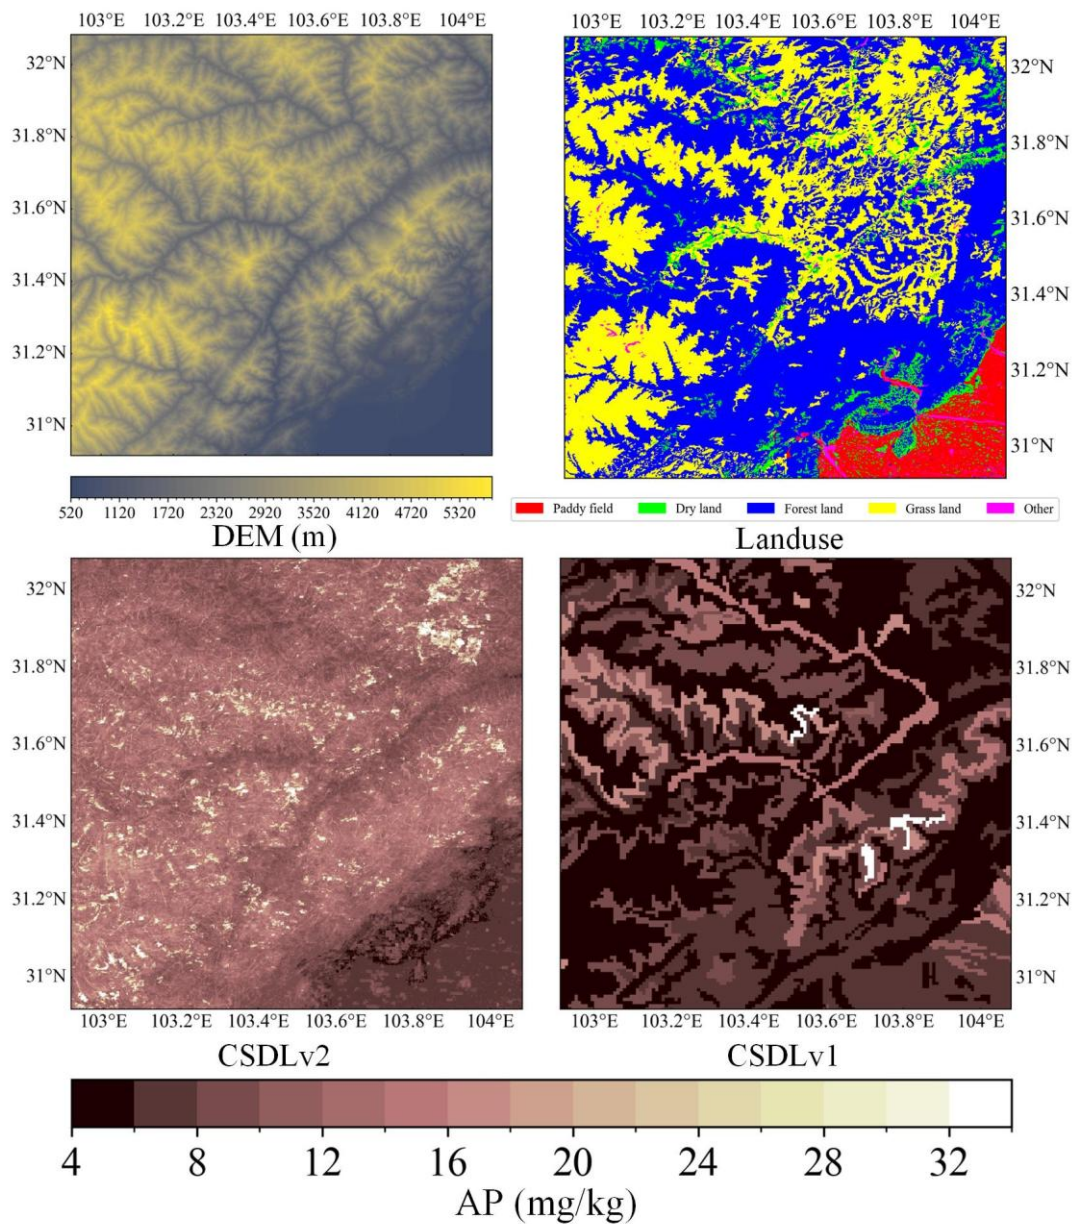

295

**Figure S71.** Surface layer (0-5 cm) available phosphorous (AP) maps derived from our predictions (CSDLv2) and CSDLv1, respectively, in a selected area (102.92°-104.08°E and 30.92°-32.08°N) located in Sichuan province. This selected area corresponds to the red window shown in Figure 1. DEM and land use refer to the land surface elevation and land use type of the selected area, respectively. The spatial resolutions are 90 m for CSDLv2 and 1 km for CSDLv1. Note that AP data is not available in SoilGrids 2.0 and HWSD 2.0, therefore no visualizations are provided for these datasets.

300

**Table S1. List of environmental covariates used to characterize soil-forming environments.**

| <b>Factors definitions</b> | <b>Description</b>           | <b>Resolution (m)</b> | <b>Source data set</b>                                                                                                                                                                                                          |
|----------------------------|------------------------------|-----------------------|---------------------------------------------------------------------------------------------------------------------------------------------------------------------------------------------------------------------------------|
| <b>Soil (28)</b>           |                              |                       |                                                                                                                                                                                                                                 |
| STGHWS <sup>1</sup>        | Dominant soil group          | 5000                  | <a href="https://www.fao.org/soils-portal/data-hub/soil-maps-and-databases/harmonized-world-soil-database-v12/en/">https://www.fao.org/soils-portal/data-hub/soil-maps-and-databases/harmonized-world-soil-database-v12/en/</a> |
| GVRHWS                     | Percent coverage Vertisols   | 1000                  | <a href="https://www.fao.org/soils-portal/data-hub/soil-maps-and-databases/harmonized-world-soil-database-v34/en/">https://www.fao.org/soils-portal/data-hub/soil-maps-and-databases/harmonized-world-soil-database-v34/en/</a> |
| GUMHWS                     | Percent coverage Umbrisols   | 1000                  | <a href="https://www.fao.org/soils-portal/data-hub/soil-maps-and-databases/harmonized-world-soil-database-v33/en/">https://www.fao.org/soils-portal/data-hub/soil-maps-and-databases/harmonized-world-soil-database-v33/en/</a> |
| GSTHWS                     | Percent coverage Stagnosols  | 1000                  | <a href="https://www.fao.org/soils-portal/data-hub/soil-maps-and-databases/harmonized-world-soil-database-v37/en/">https://www.fao.org/soils-portal/data-hub/soil-maps-and-databases/harmonized-world-soil-database-v37/en/</a> |
| GSNHWS                     | Percent coverage Solonetz    | 1000                  | <a href="https://www.fao.org/soils-portal/data-hub/soil-maps-and-databases/harmonized-world-soil-database-v32/en/">https://www.fao.org/soils-portal/data-hub/soil-maps-and-databases/harmonized-world-soil-database-v32/en/</a> |
| GSCHWS                     | Percent coverage Solonchaks  | 1000                  | <a href="https://www.fao.org/soils-portal/data-hub/soil-maps-and-databases/harmonized-world-soil-database-v31/en/">https://www.fao.org/soils-portal/data-hub/soil-maps-and-databases/harmonized-world-soil-database-v31/en/</a> |
| GRGHWS                     | Percent coverage Regosols    | 1000                  | <a href="https://www.fao.org/soils-portal/data-hub/soil-maps-and-databases/harmonized-world-soil-database-v30/en/">https://www.fao.org/soils-portal/data-hub/soil-maps-and-databases/harmonized-world-soil-database-v30/en/</a> |
| GPZHWS                     | Percent coverage Podzols     | 1000                  | <a href="https://www.fao.org/soils-portal/data-hub/soil-maps-and-databases/harmonized-world-soil-database-v29/en/">https://www.fao.org/soils-portal/data-hub/soil-maps-and-databases/harmonized-world-soil-database-v29/en/</a> |
| GPTHWS                     | Percent coverage Plinthosols | 1000                  | <a href="https://www.fao.org/soils-portal/data-hub/soil-maps-and-databases/harmonized-world-soil-database-v28/en/">https://www.fao.org/soils-portal/data-hub/soil-maps-and-databases/harmonized-world-soil-database-v28/en/</a> |

| <b>Factors definitions</b> | <b>Description</b>           | <b>Resolution (m)</b> | <b>Source data set</b>                                                                                                                                                                                                          |
|----------------------------|------------------------------|-----------------------|---------------------------------------------------------------------------------------------------------------------------------------------------------------------------------------------------------------------------------|
| GPLHWS                     | Percent coverage Planosols   | 1000                  | <a href="https://www.fao.org/soils-portal/data-hub/soil-maps-and-databases/harmonized-world-soil-database-v27/en/">https://www.fao.org/soils-portal/data-hub/soil-maps-and-databases/harmonized-world-soil-database-v27/en/</a> |
| GLPHWS <sup>1</sup>        | Percent coverage Leptosols   | 1000                  | <a href="https://www.fao.org/soils-portal/data-hub/soil-maps-and-databases/harmonized-world-soil-database-v26/en/">https://www.fao.org/soils-portal/data-hub/soil-maps-and-databases/harmonized-world-soil-database-v26/en/</a> |
| GKSHWS                     | Percent coverage Kastanozems | 1000                  | <a href="https://www.fao.org/soils-portal/data-hub/soil-maps-and-databases/harmonized-world-soil-database-v25/en/">https://www.fao.org/soils-portal/data-hub/soil-maps-and-databases/harmonized-world-soil-database-v25/en/</a> |
| GHSHWS                     | Percent coverage Histosols   | 1000                  | <a href="https://www.fao.org/soils-portal/data-hub/soil-maps-and-databases/harmonized-world-soil-database-v24/en/">https://www.fao.org/soils-portal/data-hub/soil-maps-and-databases/harmonized-world-soil-database-v24/en/</a> |
| GGYHWS <sup>1</sup>        | Percent coverage Gypsisols   | 1000                  | <a href="https://www.fao.org/soils-portal/data-hub/soil-maps-and-databases/harmonized-world-soil-database-v23/en/">https://www.fao.org/soils-portal/data-hub/soil-maps-and-databases/harmonized-world-soil-database-v23/en/</a> |
| GGLHWS                     | Percent coverage Gleysols    | 1000                  | <a href="https://www.fao.org/soils-portal/data-hub/soil-maps-and-databases/harmonized-world-soil-database-v22/en/">https://www.fao.org/soils-portal/data-hub/soil-maps-and-databases/harmonized-world-soil-database-v22/en/</a> |
| GFRHWS                     | Percent coverage Ferralsols  | 1000                  | <a href="https://www.fao.org/soils-portal/data-hub/soil-maps-and-databases/harmonized-world-soil-database-v20/en/">https://www.fao.org/soils-portal/data-hub/soil-maps-and-databases/harmonized-world-soil-database-v20/en/</a> |
| GFLHWS                     | Percent coverage Fluvisols   | 1000                  | <a href="https://www.fao.org/soils-portal/data-hub/soil-maps-and-databases/harmonized-world-soil-database-v21/en/">https://www.fao.org/soils-portal/data-hub/soil-maps-and-databases/harmonized-world-soil-database-v21/en/</a> |
| GCRHWS                     | Percent coverage Cryosols    | 1000                  | <a href="https://www.fao.org/soils-portal/data-hub/soil-maps-and-databases/harmonized-world-soil-database-v19/en/">https://www.fao.org/soils-portal/data-hub/soil-maps-and-databases/harmonized-world-soil-database-v19/en/</a> |
| GCMHWS <sup>1</sup>        | Percent coverage Cambisols   | 1000                  | <a href="https://www.fao.org/soils-portal/data-hub/soil-maps-and-databases/harmonized-world-soil-database-v17/en/">https://www.fao.org/soils-portal/data-hub/soil-maps-and-databases/harmonized-world-soil-database-v17/en/</a> |

| <b>Factors definitions</b> | <b>Description</b>                         | <b>Resolution (m)</b> | <b>Source data set</b>                                                                                                                                                                                                          |
|----------------------------|--------------------------------------------|-----------------------|---------------------------------------------------------------------------------------------------------------------------------------------------------------------------------------------------------------------------------|
| GCLHWS                     | Percent coverage Calcisols                 | 1000                  | <a href="https://www.fao.org/soils-portal/data-hub/soil-maps-and-databases/harmonized-world-soil-database-v16/en/">https://www.fao.org/soils-portal/data-hub/soil-maps-and-databases/harmonized-world-soil-database-v16/en/</a> |
| GCHHWS                     | Percent coverage Chernozems                | 1000                  | <a href="https://www.fao.org/soils-portal/data-hub/soil-maps-and-databases/harmonized-world-soil-database-v18/en/">https://www.fao.org/soils-portal/data-hub/soil-maps-and-databases/harmonized-world-soil-database-v18/en/</a> |
| GATHWS                     | Percent coverage Anthrosols                | 1000                  | <a href="https://www.fao.org/soils-portal/data-hub/soil-maps-and-databases/harmonized-world-soil-database-v36/en/">https://www.fao.org/soils-portal/data-hub/soil-maps-and-databases/harmonized-world-soil-database-v36/en/</a> |
| GARHWS                     | Percent coverage Arenosols                 | 1000                  | <a href="https://www.fao.org/soils-portal/data-hub/soil-maps-and-databases/harmonized-world-soil-database-v15/en/">https://www.fao.org/soils-portal/data-hub/soil-maps-and-databases/harmonized-world-soil-database-v15/en/</a> |
| GANHWS                     | Percent coverage Andosols                  | 1000                  | <a href="https://www.fao.org/soils-portal/data-hub/soil-maps-and-databases/harmonized-world-soil-database-v14/en/">https://www.fao.org/soils-portal/data-hub/soil-maps-and-databases/harmonized-world-soil-database-v14/en/</a> |
| GALHWS                     | Percent coverage Alisols                   | 1000                  | <a href="https://www.fao.org/soils-portal/data-hub/soil-maps-and-databases/harmonized-world-soil-database-v35/en/">https://www.fao.org/soils-portal/data-hub/soil-maps-and-databases/harmonized-world-soil-database-v35/en/</a> |
| GACHWS                     | Percent coverage Acrisols                  | 1000                  | <a href="https://www.fao.org/soils-portal/data-hub/soil-maps-and-databases/harmonized-world-soil-database-v12/en/">https://www.fao.org/soils-portal/data-hub/soil-maps-and-databases/harmonized-world-soil-database-v12/en/</a> |
| GABHWS                     | Percent coverage Albeluvisols              | 1000                  | <a href="https://www.fao.org/soils-portal/data-hub/soil-maps-and-databases/harmonized-world-soil-database-v13/en/">https://www.fao.org/soils-portal/data-hub/soil-maps-and-databases/harmonized-world-soil-database-v13/en/</a> |
| BDTICM <sup>1</sup>        | Depth to bedrock of China                  | 90                    | <a href="http://globalchange.bnu.edu.cn/research/cdtb.jsp">http://globalchange.bnu.edu.cn/research/cdtb.jsp</a>                                                                                                                 |
| <b>Climate (36)</b>        |                                            |                       |                                                                                                                                                                                                                                 |
| TX6MOD <sup>1</sup>        | Mean Long-term Surface Temperature Oct/Nov | 1000                  | <a href="https://modis.gsfc.nasa.gov">https://modis.gsfc.nasa.gov</a>                                                                                                                                                           |
| TX5MOD                     | Mean Long-term Surface Temperature Aug/Sep | 1000                  | <a href="https://modis.gsfc.nasa.gov">https://modis.gsfc.nasa.gov</a>                                                                                                                                                           |

| <b>Factors definitions</b> | <b>Description</b>                                     | <b>Resolution (m)</b> | <b>Source data set</b>                                                |
|----------------------------|--------------------------------------------------------|-----------------------|-----------------------------------------------------------------------|
| TX4MOD                     | Mean Long-term Surface Temperature Jun/Jul             | 1000                  | <a href="https://modis.gsfc.nasa.gov">https://modis.gsfc.nasa.gov</a> |
| TX3MOD                     | Mean Long-term Surface Temperature Apr/May             | 1000                  | <a href="https://modis.gsfc.nasa.gov">https://modis.gsfc.nasa.gov</a> |
| TX2MOD                     | Mean Long-term Surface Temperature Feb/Mar             | 1000                  | <a href="https://modis.gsfc.nasa.gov">https://modis.gsfc.nasa.gov</a> |
| TX1MOD <sup>1</sup>        | Mean value of the day-time LST                         | 1000                  | <a href="https://modis.gsfc.nasa.gov">https://modis.gsfc.nasa.gov</a> |
| TNSMOD <sup>1</sup>        | Standard deviation Long-term night surface temperature | 1000                  | <a href="https://modis.gsfc.nasa.gov">https://modis.gsfc.nasa.gov</a> |
| TNMMOD                     | Mean value Long-term night surface temperature         | 1000                  | <a href="https://modis.gsfc.nasa.gov">https://modis.gsfc.nasa.gov</a> |
| TNLMOD                     | Minimum Long-term surface temperature                  | 1000                  | <a href="https://modis.gsfc.nasa.gov">https://modis.gsfc.nasa.gov</a> |
| TNHMOD <sup>1</sup>        | Maximum Long-term night surface temperature            | 1000                  | <a href="https://modis.gsfc.nasa.gov">https://modis.gsfc.nasa.gov</a> |
| TDSMOD                     | Standard deviation of day-time LST                     | 1000                  | <a href="https://modis.gsfc.nasa.gov">https://modis.gsfc.nasa.gov</a> |
| TDMMOD                     | Mean Long-term day surface temperature                 | 1000                  | <a href="https://modis.gsfc.nasa.gov">https://modis.gsfc.nasa.gov</a> |
| TDLMOD                     | Minimum Long-term day surface temperature              | 1000                  | <a href="https://modis.gsfc.nasa.gov">https://modis.gsfc.nasa.gov</a> |
| TDHMOD                     | Maximum Long-term day surface temperature              | 1000                  | <a href="https://modis.gsfc.nasa.gov">https://modis.gsfc.nasa.gov</a> |
| PX4WCL                     | Long-term Precipitation Aug/Sep/Oct                    | 1000                  | <a href="https://www.worldclim.org/">https://www.worldclim.org/</a>   |
| PX3WCL                     | Long-term Precipitation of May/June/July               | 1000                  | <a href="https://www.worldclim.org/">https://www.worldclim.org/</a>   |
| PX2WCL                     | Long-term Precipitation of Feb/Mar/Apr                 | 1000                  | <a href="https://www.worldclim.org/">https://www.worldclim.org/</a>   |



| Factors definitions | Description                                           | Resolution (m) | Source data set                                                                                                                                                         |
|---------------------|-------------------------------------------------------|----------------|-------------------------------------------------------------------------------------------------------------------------------------------------------------------------|
| PX1WCL              | Long-term precipitation of Nov/Dec/Jan                | 1000           | <a href="https://www.worldclim.org/">https://www.worldclim.org/</a>                                                                                                     |
| PREGSM <sup>1</sup> | Mean monthly precipitation (annual)                   | 1000           | <a href="http://chelsa-climate.org/">http://chelsa-climate.org/</a>                                                                                                     |
| P12DWD              | Monthly precipitation for December                    | 5000           | <a href="http://chelsa-climate.org/">http://chelsa-climate.org/</a>                                                                                                     |
| P11DWD              | Mean precipitation of November                        | 1000           | <a href="http://chelsa-climate.org/">http://chelsa-climate.org/</a>                                                                                                     |
| P10DWD              | Mean precipitation of October                         | 1000           | <a href="http://chelsa-climate.org/">http://chelsa-climate.org/</a>                                                                                                     |
| P09DWD              | Mean precipitation of September                       | 1000           | <a href="http://chelsa-climate.org/">http://chelsa-climate.org/</a>                                                                                                     |
| P08DWD              | Mean precipitation of August                          | 1000           | <a href="http://chelsa-climate.org/">http://chelsa-climate.org/</a>                                                                                                     |
| P07DWD              | Mean precipitation of July                            | 1000           | <a href="http://chelsa-climate.org/">http://chelsa-climate.org/</a>                                                                                                     |
| P06DWD              | Mean precipitation of June                            | 1000           | <a href="http://chelsa-climate.org/">http://chelsa-climate.org/</a>                                                                                                     |
| P05DWD              | Mean precipitation of May                             | 1000           | <a href="http://chelsa-climate.org/">http://chelsa-climate.org/</a>                                                                                                     |
| P04DWD              | Mean precipitation of April                           | 1000           | <a href="http://chelsa-climate.org/">http://chelsa-climate.org/</a>                                                                                                     |
| P03DWD              | Mean precipitation of Mar                             | 1000           | <a href="http://chelsa-climate.org/">http://chelsa-climate.org/</a>                                                                                                     |
| P02DWD              | Monthly precipitation for February                    | 1000           | <a href="http://chelsa-climate.org/">http://chelsa-climate.org/</a>                                                                                                     |
| P01DWD <sup>1</sup> | Monthly precipitation for January                     | 1000           | <a href="http://chelsa-climate.org/">http://chelsa-climate.org/</a>                                                                                                     |
| MODCF <sup>1</sup>  | EC                                                    | 1000           | <a href="http://journals.plos.org/plosbiology/article?id=10.1371/journal.pbio.1002415">http://journals.plos.org/plosbiology/article?id=10.1371/journal.pbio.1002415</a> |
| L15IGB              | Snow and ice index                                    | 1000           | <a href="https://modis.gsfc.nasa.gov">https://modis.gsfc.nasa.gov</a>                                                                                                   |
| INSSRE <sup>1</sup> | Standard deviation Potential incoming solar radiation | 1000           | <a href="https://www.worldgrids.com">https://www.worldgrids.com</a>                                                                                                     |
| INMSRE <sup>1</sup> | Mean potential incoming solar radiation               | 1000           | <a href="https://www.worldgrids.com">https://www.worldgrids.com</a>                                                                                                     |
| G22ESA              | Permanent snow and ice                                | 1000           | <a href="http://due.esrin.esa.int/page_globcover.php">http://due.esrin.esa.int/page_globcover.php</a>                                                                   |

## Organisms (50)

| <b>Factors definitions</b> | <b>Description</b>                                                                       | <b>Resolution (m)</b> | <b>Source data set</b>                                                                                                              |
|----------------------------|------------------------------------------------------------------------------------------|-----------------------|-------------------------------------------------------------------------------------------------------------------------------------|
| B5/B7 <sup>1</sup>         | The ratio of Band 5 (near-infrared) to Band 7 (shortwave infrared 2) surface reflectance | 90                    | <a href="https://www.usgs.gov/landsat-missions/landsat-collection-2">https://www.usgs.gov/landsat-missions/landsat-collection-2</a> |
| NDVI <sup>1</sup>          | Normalized Difference Vegetation Index                                                   | 90                    | Calculated from Landsat 8 Collection 2 Level-2 (LC08C02) on the GEE platform                                                        |
| NDWI <sup>1</sup>          | Normalized Difference Water Index                                                        | 90                    | Calculated from Landsat 8 Collection 2 Level-2 (LC08C02) on the GEE platform                                                        |
| surR <sup>1</sup>          | Surface Reflectance                                                                      | 250                   | <a href="https://modis.gsfc.nasa.gov/data/dataproduct/mod09.php">https://modis.gsfc.nasa.gov/data/dataproduct/mod09.php</a>         |
| EVI                        | Enhanced Vegetation Index                                                                | 500                   | Calculated from LC08C02 on the GEE platform                                                                                         |
| SAI <sup>1</sup>           | Snow Area Index                                                                          | 500                   | Calculated from LC08C02 on the GEE platform                                                                                         |
| LAI <sup>1</sup>           | Leaf Area Index                                                                          | 90                    | Calculated from LC08C02 on the GEE platform                                                                                         |
| NPP                        | Net Primary Productivity                                                                 | 500                   | <a href="https://lpdaac.usgs.gov/products/mod17a3hgv061/">https://lpdaac.usgs.gov/products/mod17a3hgv061/</a>                       |
| landuse <sup>1</sup>       | Land use type                                                                            | 30                    | <a href="https://www.resdc.cn/DOI/DOI.aspx?DOIID=54">https://www.resdc.cn/DOI/DOI.aspx?DOIID=54</a>                                 |
| CanopyHeight <sup>1</sup>  | Canopy Height                                                                            | 10                    | <a href="https://doi.org/10.3929/ethz-b-000609802">https://doi.org/10.3929/ethz-b-000609802</a>                                     |
| Sentinel2B2 <sup>1</sup>   | Band2 from Sentinel2                                                                     | 90                    | Derived from Sentinel2 on the GEE platform                                                                                          |
| Sentinel2B3                | Band3 from Sentinel2                                                                     | 90                    | Derived from Sentinel2 on the GEE platform                                                                                          |
| Sentinel2B4                | Band4 from Sentinel2                                                                     | 90                    | Derived from Sentinel2 on the GEE platform                                                                                          |
| Sentinel2B8                | Band8 from Sentinel2                                                                     | 90                    | Derived from Sentinel2 on the GEE platform                                                                                          |
| Sentinel2B9                | Band9 from Sentinel2                                                                     | 90                    | Derived from Sentinel2 on the GEE platform                                                                                          |
| QA_PIXEL <sup>1</sup>      | Landsat 8 Collection 2 Level-2 Pixel Quality Band                                        | 90                    | Derived from LC08C02 on the GEE platform                                                                                            |
| QA_RADSAT                  | Radiometric Saturation Quality control                                                   | 90                    | Derived from LC08C02 on the GEE platform                                                                                            |
| SR_B4 <sup>1</sup>         | Surface Reflectance of Band4                                                             | 90                    | Derived from LC08C02 on the GEE platform                                                                                            |
| SR_B5                      | Surface Reflectance of Band5                                                             | 90                    | Derived from LC08C02 on the GEE platform                                                                                            |
| SR_B6                      | Surface Reflectance of Band6                                                             | 90                    | Derived from LC08C02 on the GEE platform                                                                                            |
| SR_B7                      | Surface Reflectance of Band7                                                             | 90                    | Derived from LC08C02 on the GEE platform                                                                                            |
| ST_ATRAN                   | Atmospheric Transmittance                                                                | 90                    | Derived from LC08C02 on the GEE platform                                                                                            |
| ST_B10                     | Band 10 Surface Temperature                                                              | 90                    | Derived from LC08C02 on the GEE platform                                                                                            |
| ST_EMSSD                   | Emissivity standard deviation                                                            | 90                    | Derived from LC08C02 on the GEE platform                                                                                            |

| <b>Factors definitions</b> | <b>Description</b>                                      | <b>Resolution (m)</b> | <b>Source data set</b>                                                                                                                                    |
|----------------------------|---------------------------------------------------------|-----------------------|-----------------------------------------------------------------------------------------------------------------------------------------------------------|
| ST_TRAD                    | Thermal Radiance                                        | 90                    | Derived from LC08C02 on the GEE platform                                                                                                                  |
| ST_URAD                    | Downwelled Radiance                                     | 90                    | Derived from LC08C02 on the GEE platform                                                                                                                  |
| wc2.1_prec                 |                                                         | 1000                  |                                                                                                                                                           |
| wc2.1_srad <sup>1</sup>    | solar radiation (kJ m <sup>-2</sup> day <sup>-1</sup> ) | 1000                  | <a href="https://worldclim.org/data/worldclim21.html">https://worldclim.org/data/worldclim21.html</a>                                                     |
| wc2.1_tavg                 | average temperature (°C)                                | 1000                  | <a href="https://worldclim.org/data/worldclim21.html">https://worldclim.org/data/worldclim21.html</a>                                                     |
| wc2.1_tmax                 | maximum temperature (°C)                                | 1000                  | <a href="https://worldclim.org/data/worldclim21.html">https://worldclim.org/data/worldclim21.html</a>                                                     |
| wc2.1_tmin                 | minimum temperature (°C)                                | 1000                  | <a href="https://worldclim.org/data/worldclim21.html">https://worldclim.org/data/worldclim21.html</a>                                                     |
| wc2.1_prec                 | precipitation (mm)                                      | 1000                  | <a href="https://worldclim.org/data/worldclim21.html">https://worldclim.org/data/worldclim21.html</a>                                                     |
| wc2.1_wind <sup>1</sup>    | wind speed (m s <sup>-1</sup> )                         | 1000                  | <a href="https://worldclim.org/data/worldclim21.html">https://worldclim.org/data/worldclim21.html</a>                                                     |
| RANGE0105                  | Range of Enhanced Vegetation Index                      | 1000                  | <a href="http://onlinelibrary.wiley.com/doi/10.1111/geb.12368/abstract">http://onlinelibrary.wiley.com/doi/10.1111/geb.12368/abstract</a>                 |
| PDMGPW <sup>1</sup>        | Average population density                              | 5000                  | <a href="https://www.worldgrids.com">https://www.worldgrids.com</a>                                                                                       |
| MAX0105                    | Maximum of Enhanced Vegetation Index                    | 1000                  | <a href="http://onlinelibrary.wiley.com/doi/10.1111/geb.12367/abstract">http://onlinelibrary.wiley.com/doi/10.1111/geb.12367/abstract</a>                 |
| LCEE10                     | ESA land cover                                          | 300                   | <a href="http://maps.elie.ucl.ac.be/CCI/viewer/download/ESACCI-LC-PUG-v2.5.pdf">http://maps.elie.ucl.ac.be/CCI/viewer/download/ESACCI-LC-PUG-v2.5.pdf</a> |
| L16IGB                     | Barren or sparsely vegetated                            | 1000                  | <a href="https://modis.gsfc.nasa.gov">https://modis.gsfc.nasa.gov</a>                                                                                     |
| L14IGB                     | Cropland/natural vegetation mosaic                      | 1000                  | <a href="https://modis.gsfc.nasa.gov">https://modis.gsfc.nasa.gov</a>                                                                                     |
| L13IGB                     | Urban and built-up                                      | 1000                  | <a href="https://modis.gsfc.nasa.gov">https://modis.gsfc.nasa.gov</a>                                                                                     |
| L12IGB                     | Croplands index                                         | 1000                  | <a href="https://modis.gsfc.nasa.gov">https://modis.gsfc.nasa.gov</a>                                                                                     |
| L11IGB                     | Permanent Wetlands                                      | 1000                  | <a href="https://modis.gsfc.nasa.gov">https://modis.gsfc.nasa.gov</a>                                                                                     |
| L10IGB                     | Grasslands                                              | 1000                  | <a href="https://modis.gsfc.nasa.gov">https://modis.gsfc.nasa.gov</a>                                                                                     |
| L09IGB                     | Savannas                                                | 1000                  | <a href="https://modis.gsfc.nasa.gov">https://modis.gsfc.nasa.gov</a>                                                                                     |
| L06IGB                     | Closed shrublands                                       | 1000                  | <a href="https://modis.gsfc.nasa.gov">https://modis.gsfc.nasa.gov</a>                                                                                     |
| L05IGB                     | Mixed forests index                                     | 1000                  | <a href="https://modis.gsfc.nasa.gov">https://modis.gsfc.nasa.gov</a>                                                                                     |
| L04IGB <sup>1</sup>        | Deciduous broadleaf forest                              | 1000                  | <a href="https://modis.gsfc.nasa.gov">https://modis.gsfc.nasa.gov</a>                                                                                     |
| L03IGB                     | Deciduous needleleaf forest                             | 1000                  | <a href="https://modis.gsfc.nasa.gov">https://modis.gsfc.nasa.gov</a>                                                                                     |
| L02IGB                     | Evergreen broadleaf forest                              | 1000                  | <a href="https://modis.gsfc.nasa.gov">https://modis.gsfc.nasa.gov</a>                                                                                     |
| L01IGB                     | Evergreen needleleaf forest                             | 1000                  | <a href="https://modis.gsfc.nasa.gov">https://modis.gsfc.nasa.gov</a>                                                                                     |

| <b>Factors definitions</b> | <b>Description</b>                                                                                                      | <b>Resolution (m)</b> | <b>Source data set</b>                                                                                |
|----------------------------|-------------------------------------------------------------------------------------------------------------------------|-----------------------|-------------------------------------------------------------------------------------------------------|
| GLCJRC                     | Global Land Cover map for the year 2000                                                                                 | 1000                  | <a href="http://www.globallandcover.com/">http://www.globallandcover.com/</a>                         |
| GLCESA                     | Land Cover classes                                                                                                      | 1000                  | <a href="http://due.esrin.esa.int/page_globcover.php">http://due.esrin.esa.int/page_globcover.php</a> |
| GACGEM <sup>1</sup>        | Global accessibility map                                                                                                | 1000                  | <a href="http://globalaccessibilitymap.com/">http://globalaccessibilitymap.com/</a>                   |
| G21ESA                     | Water bodies                                                                                                            | 1000                  | <a href="http://due.esrin.esa.int/page_globcover.php">http://due.esrin.esa.int/page_globcover.php</a> |
| G20ESA                     | Bare areas                                                                                                              | 1000                  | <a href="http://due.esrin.esa.int/page_globcover.php">http://due.esrin.esa.int/page_globcover.php</a> |
| G19ESA                     | Artificial surfaces and associated areas                                                                                | 1000                  | <a href="http://due.esrin.esa.int/page_globcover.php">http://due.esrin.esa.int/page_globcover.php</a> |
| G18ESA                     | Closed to open grassland or woody vegetation on regularly flooded or waterlogged soil - Fresh, brackish or saline water | 1000                  | <a href="http://due.esrin.esa.int/page_globcover.php">http://due.esrin.esa.int/page_globcover.php</a> |
| G17ESA                     | Closed broadleaved forest or shrubland permanently flooded - Saline or brackish water                                   | 1000                  | <a href="http://due.esrin.esa.int/page_globcover.php">http://due.esrin.esa.int/page_globcover.php</a> |
| G16ESA                     | Closed to open broadleaved forest regularly flooded - Fresh or brackish water                                           | 1000                  | <a href="http://due.esrin.esa.int/page_globcover.php">http://due.esrin.esa.int/page_globcover.php</a> |
| G15ESA                     | Sparse (<15%) vegetation                                                                                                | 1000                  | <a href="http://due.esrin.esa.int/page_globcover.php">http://due.esrin.esa.int/page_globcover.php</a> |
| G14ESA                     | Closed to open shrubland                                                                                                | 1000                  | <a href="http://due.esrin.esa.int/page_globcover.php">http://due.esrin.esa.int/page_globcover.php</a> |
| G12IGB                     | Land cover types for 2012                                                                                               | 1000                  | <a href="https://modis.gsfc.nasa.gov">https://modis.gsfc.nasa.gov</a>                                 |
| G11IGB                     | Land cover types for 2011                                                                                               | 1000                  | <a href="https://modis.gsfc.nasa.gov">https://modis.gsfc.nasa.gov</a>                                 |
| G11ESA                     | Mosaic forest or shrubland / grassland                                                                                  | 1000                  | <a href="http://due.esrin.esa.int/page_globcover.php">http://due.esrin.esa.int/page_globcover.php</a> |
| G10IGB                     | Land cover types for 2010                                                                                               | 1000                  | <a href="https://modis.gsfc.nasa.gov">https://modis.gsfc.nasa.gov</a>                                 |
| G10ESA                     | Closed to open mixed broadleaved and needleleaved forest                                                                | 1000                  | <a href="http://due.esrin.esa.int/page_globcover.php">http://due.esrin.esa.int/page_globcover.php</a> |
| G09ESA                     | Open needleleaved deciduous or evergreen forest                                                                         | 1000                  | <a href="http://due.esrin.esa.int/page_globcover.php">http://due.esrin.esa.int/page_globcover.php</a> |

| <b>Factors definitions</b> | <b>Description</b>                                            | <b>Resolution (m)</b> | <b>Source data set</b>                                                                                                                                                                                  |
|----------------------------|---------------------------------------------------------------|-----------------------|---------------------------------------------------------------------------------------------------------------------------------------------------------------------------------------------------------|
| G08ESA                     | Closed needleleaved evergreen forest                          | 1000                  | <a href="http://due.esrin.esa.int/page_globcover.php">http://due.esrin.esa.int/page_globcover.php</a>                                                                                                   |
| G07ESA                     | Open broadleaved deciduous forest/woodland                    | 1000                  | <a href="http://due.esrin.esa.int/page_globcover.php">http://due.esrin.esa.int/page_globcover.php</a>                                                                                                   |
| G05ESA                     | Closed to open broadleaved evergreen or semi-deciduous forest | 1000                  | <a href="http://due.esrin.esa.int/page_globcover.php">http://due.esrin.esa.int/page_globcover.php</a>                                                                                                   |
| G04IGB                     | Land cover types for 2004                                     | 1000                  | <a href="https://modis.gsfc.nasa.gov">https://modis.gsfc.nasa.gov</a>                                                                                                                                   |
| G04ESA                     | Mosaic vegetation / cropland                                  | 1000                  | <a href="http://due.esrin.esa.int/page_globcover.php">http://due.esrin.esa.int/page_globcover.php</a>                                                                                                   |
| G03ESA                     | Mosaic cropland / vegetation                                  | 1000                  | <a href="http://due.esrin.esa.int/page_globcover.php">http://due.esrin.esa.int/page_globcover.php</a>                                                                                                   |
| G02IGB                     | Land cover types for 2002                                     | 1000                  | <a href="https://modis.gsfc.nasa.gov">https://modis.gsfc.nasa.gov</a>                                                                                                                                   |
| G02ESA                     | Rainfed croplands                                             | 1000                  | <a href="http://due.esrin.esa.int/page_globcover.php">http://due.esrin.esa.int/page_globcover.php</a>                                                                                                   |
| G01IGB                     | Land cover types for 2001                                     | 1000                  | <a href="https://modis.gsfc.nasa.gov">https://modis.gsfc.nasa.gov</a>                                                                                                                                   |
| G01ESA                     | Post-flooding or irrigated croplands (or aquatic)             | 1000                  | <a href="http://due.esrin.esa.int/page_globcover.php">http://due.esrin.esa.int/page_globcover.php</a>                                                                                                   |
| EVSMOD                     | Standard deviation MODIS Enhanced Vegetation Index            | 1000                  | <a href="https://modis.gsfc.nasa.gov">https://modis.gsfc.nasa.gov</a>                                                                                                                                   |
| EVMMOD <sup>1</sup>        | Mean MODIS Enhanced Vegetation Index                          | 1000                  | <a href="https://modis.gsfc.nasa.gov">https://modis.gsfc.nasa.gov</a>                                                                                                                                   |
| EVENNESS                   | Evenness of Enhanced Vegetation Index                         | 1000                  | <a href="http://onlinelibrary.wiley.com/doi/10.1111/geb.12366/abstract">http://onlinelibrary.wiley.com/doi/10.1111/geb.12366/abstract</a>                                                               |
| ENTROPY                    | Disorderliness of Enhanced Vegetation Index                   | 1000                  | <a href="http://onlinelibrary.wiley.com/doi/10.1111/geb.12365/abstract">http://onlinelibrary.wiley.com/doi/10.1111/geb.12365/abstract</a>                                                               |
| COVER                      | Land cover of 2010                                            | 300                   | <a href="http://www.sciencemag.org/content/342/6160/850">http://www.sciencemag.org/content/342/6160/850</a>                                                                                             |
| TERECO <sup>1</sup>        | Terrestrial Ecosystems                                        | 250                   | <a href="https://landscape12.arcgis.com/arcgis/rest/services/World_Terrestrial_Ecosystems/ImageServer">https://landscape12.arcgis.com/arcgis/rest/services/World_Terrestrial_Ecosystems/ImageServer</a> |

### **Relief (13)**

|                  |                                              |      |                                                                                                                     |
|------------------|----------------------------------------------|------|---------------------------------------------------------------------------------------------------------------------|
| L3POBI           | Physiographic landform units (SCALA project) | 1000 | <a href="https://www.worldgrids.com">https://www.worldgrids.com</a>                                                 |
| DEM <sup>1</sup> | Land surface elevation                       | 90   | <a href="https://hydro.iis.u-tokyo.ac.jp/~yamada/MERIT_DEM/">https://hydro.iis.u-tokyo.ac.jp/~yamada/MERIT_DEM/</a> |

| <b>Factors definitions</b> | <b>Description</b>                                | <b>Resolution (m)</b> | <b>Source data set</b>                                                                                              |
|----------------------------|---------------------------------------------------|-----------------------|---------------------------------------------------------------------------------------------------------------------|
| slope <sup>1</sup>         | Terrain slope                                     | 90                    | Derived from DEM                                                                                                    |
| DEM_crd                    | Local downslope Curvature                         | 90                    | <a href="http://hydro.iis.u-tokyo.ac.jp/~yamadai/MERIT_DEM/">http://hydro.iis.u-tokyo.ac.jp/~yamadai/MERIT_DEM/</a> |
| DEM_cru                    | Local upslope Curvature                           | 90                    | <a href="http://hydro.iis.u-tokyo.ac.jp/~yamadai/MERIT_DEM/">http://hydro.iis.u-tokyo.ac.jp/~yamadai/MERIT_DEM/</a> |
| DEM_crv                    | Downslope Curvature                               | 90                    | <a href="http://hydro.iis.u-tokyo.ac.jp/~yamadai/MERIT_DEM/">http://hydro.iis.u-tokyo.ac.jp/~yamadai/MERIT_DEM/</a> |
| DEM_dvm                    | Deviation from Mean Value (surface roughness) x9  | 90                    | <a href="http://hydro.iis.u-tokyo.ac.jp/~yamadai/MERIT_DEM/">http://hydro.iis.u-tokyo.ac.jp/~yamadai/MERIT_DEM/</a> |
| DEM_dvm2                   | Deviation from Mean Value (surface roughness) x13 | 90                    | <a href="http://hydro.iis.u-tokyo.ac.jp/~yamadai/MERIT_DEM/">http://hydro.iis.u-tokyo.ac.jp/~yamadai/MERIT_DEM/</a> |
| DEM_mrn                    | Melton Ruggedness Number                          | 90                    | <a href="http://hydro.iis.u-tokyo.ac.jp/~yamadai/MERIT_DEM/">http://hydro.iis.u-tokyo.ac.jp/~yamadai/MERIT_DEM/</a> |
| DEM_nopn <sup>1</sup>      | Negative Topographic Openness                     | 90                    | <a href="http://hydro.iis.u-tokyo.ac.jp/~yamadai/MERIT_DEM/">http://hydro.iis.u-tokyo.ac.jp/~yamadai/MERIT_DEM/</a> |
| DEM_popn                   | Positive Topographic Openness                     | 90                    | <a href="http://hydro.iis.u-tokyo.ac.jp/~yamadai/MERIT_DEM/">http://hydro.iis.u-tokyo.ac.jp/~yamadai/MERIT_DEM/</a> |
| DEM_prof                   | Profile Curvature                                 | 90                    | <a href="http://hydro.iis.u-tokyo.ac.jp/~yamadai/MERIT_DEM/">http://hydro.iis.u-tokyo.ac.jp/~yamadai/MERIT_DEM/</a> |
| DEM_tpi                    | Topographic Position Index                        | 90                    | <a href="http://hydro.iis.u-tokyo.ac.jp/~yamadai/MERIT_DEM/">http://hydro.iis.u-tokyo.ac.jp/~yamadai/MERIT_DEM/</a> |
| DEM_twi <sup>1</sup>       | Topographic Wetness Index                         | 90                    | <a href="http://hydro.iis.u-tokyo.ac.jp/~yamadai/MERIT_DEM/">http://hydro.iis.u-tokyo.ac.jp/~yamadai/MERIT_DEM/</a> |
| DEM_vbf                    | Multiresolution Index of Valley Bottom Flatness   | 90                    | <a href="http://hydro.iis.u-tokyo.ac.jp/~yamadai/MERIT_DEM/">http://hydro.iis.u-tokyo.ac.jp/~yamadai/MERIT_DEM/</a> |

### Parent material

(2)

|                       |           |     |                                                                                                                                                          |
|-----------------------|-----------|-----|----------------------------------------------------------------------------------------------------------------------------------------------------------|
| RTMUSG15 <sup>1</sup> | Rock type | 250 | USGS Geosciences and Environmental Change Science Center (GECSC) based on the Global Lithological Map database v1.1 (GLiM, Hartmann and Moosdorf, 2012). |
|-----------------------|-----------|-----|----------------------------------------------------------------------------------------------------------------------------------------------------------|

| <b>Factors definitions</b> | <b>Description</b>                                     | <b>Resolution (m)</b> | <b>Source data set</b>                                                |
|----------------------------|--------------------------------------------------------|-----------------------|-----------------------------------------------------------------------|
| SEDDEP                     | Average soil and sedimentary deposit thickness         | 1000                  | <a href="https://www.ornl.gov/">https://www.ornl.gov/</a>             |
| <b>Other (2)</b>           |                                                        |                       |                                                                       |
| SMKMOD                     | MODIS LAI based soil productive area mask of the world | 5000                  | <a href="https://modis.gsfc.nasa.gov">https://modis.gsfc.nasa.gov</a> |
| LMTGSH <sup>1</sup>        | Land mask based on GSHHS                               | 1000                  | <a href="https://www.worldgrids.com">https://www.worldgrids.com</a>   |

<sup>1</sup>variables used in the modeling of soil organic carbon content at 0-5 cm depth interval.

**Table S2. Tuned model parameters for each soil property considered at 0-5 cm depth interval. See**

305 **Table 1 for abbreviations and units of the soil properties considered.**

| Property | Number of covariates | mtry | nodesize |
|----------|----------------------|------|----------|
| pH       | 32                   | 9    | 10       |
| Sand     | 27                   | 10   | 8        |
| Silt     | 27                   | 10   | 8        |
| Clay     | 27                   | 10   | 9        |
| BD       | 25                   | 11   | 10       |
| OC       | 26                   | 9    | 10       |
| Gravel   | 25                   | 12   | 8        |
| AN       | 29                   | 17   | 13       |
| TN       | 26                   | 16   | 10       |
| CEC      | 25                   | 9    | 10       |
| Porosity | 29                   | 11   | 15       |
| TK       | 41                   | 17   | 12       |
| TP       | 38                   | 11   | 15       |
| AK       | 43                   | 17   | 11       |
| AP       | 42                   | 19   | 12       |
| R (Wet)  | 36                   | 12   | 13       |
| G (Wet)  | 35                   | 11   | 12       |
| B (Wet)  | 35                   | 11   | 13       |
| R (Dry)  | 33                   | 12   | 13       |
| G (Dry)  | 33                   | 12   | 12       |
| B (Dry)  | 33                   | 10   | 13       |



**Table S3. Statistical description of soil properties at six depth intervals. Refer to Table 1 for the abbreviations and units of the soil properties interested.**

| Depth interval (cm) | Number | Max    | Min  | Mean  | SD    | CV   | Skewness | Kurtosis |
|---------------------|--------|--------|------|-------|-------|------|----------|----------|
| <b>pH</b>           |        |        |      |       |       |      |          |          |
| 0-5                 | 9623   | 10.59  | 2.64 | 7.12  | 1.28  | 0.18 | -0.48    | -0.71    |
| 5-15                | 9632   | 10.53  | 2.66 | 7.14  | 1.27  | 0.18 | -0.49    | -0.71    |
| 15-30               | 9596   | 10.61  | 2.76 | 7.21  | 1.25  | 0.17 | -0.54    | -0.64    |
| 30-60               | 9288   | 10.50  | 2.99 | 7.28  | 1.25  | 0.17 | -0.61    | -0.56    |
| 60-100              | 7711   | 10.36  | 2.97 | 7.33  | 1.26  | 0.17 | -0.66    | -0.56    |
| 100-200             | 2584   | 10.28  | 2.94 | 7.61  | 1.23  | 0.16 | -1.02    | 0.15     |
| <b>sand</b>         |        |        |      |       |       |      |          |          |
| 0-5                 | 8743   | 102.63 | 0.00 | 40.26 | 21.18 | 0.53 | 0.36     | -0.51    |
| 5-15                | 8152   | 99.99  | 0.00 | 40.12 | 21.01 | 0.52 | 0.30     | -0.56    |
| 15-30               | 8122   | 99.99  | 0.02 | 39.23 | 21.13 | 0.54 | 0.36     | -0.51    |
| 30-60               | 7844   | 101.84 | 0.02 | 38.70 | 22.03 | 0.57 | 0.40     | -0.57    |
| 60-100              | 6389   | 101.33 | 0.00 | 37.93 | 22.88 | 0.60 | 0.47     | -0.56    |
| 100-200             | 2127   | 101.82 | 0.22 | 37.01 | 23.18 | 0.63 | 0.62     | -0.33    |
| <b>silt</b>         |        |        |      |       |       |      |          |          |
| 0-5                 | 8926   | 96.45  | 0.00 | 40.60 | 15.88 | 0.39 | -0.07    | -0.20    |
| 5-15                | 8324   | 95.23  | 0.00 | 40.18 | 15.34 | 0.38 | -0.02    | -0.13    |
| 15-30               | 8300   | 92.53  | 0.00 | 39.90 | 15.29 | 0.38 | -0.05    | -0.19    |
| 30-60               | 8018   | 97.19  | 0.00 | 39.36 | 15.73 | 0.40 | -0.01    | -0.21    |
| 60-100              | 6562   | 102.40 | 0.00 | 39.52 | 16.38 | 0.41 | 0.01     | -0.16    |
| 100-200             | 2207   | 100.57 | 0.00 | 41.14 | 17.74 | 0.43 | -0.08    | -0.27    |
| <b>clay</b>         |        |        |      |       |       |      |          |          |
| 0-5                 | 9142   | 100.00 | 0.04 | 19.23 | 11.01 | 0.57 | 1.06     | 1.70     |
| 5-15                | 8539   | 100.00 | 0.08 | 19.70 | 11.20 | 0.57 | 1.02     | 1.44     |
| 15-30               | 8509   | 100.00 | 0.03 | 20.91 | 11.95 | 0.57 | 1.01     | 1.35     |
| 30-60               | 8225   | 100.00 | 0.00 | 22.02 | 13.02 | 0.59 | 0.96     | 1.20     |
| 60-100              | 6748   | 100.00 | 0.00 | 22.79 | 13.78 | 0.60 | 0.90     | 0.92     |
| 100-200             | 2302   | 84.67  | 0.04 | 22.16 | 13.35 | 0.60 | 0.96     | 1.22     |

| Depth interval (cm) | Number | Max     | Min  | Mean   | SD     | CV   | Skewness | Kurtosis |
|---------------------|--------|---------|------|--------|--------|------|----------|----------|
| <b>BD</b>           |        |         |      |        |        |      |          |          |
| 0-5                 | 1531   | 2.21    | 0.14 | 1.24   | 0.20   | 0.16 | -0.69    | 2.84     |
| 5-15                | 1556   | 2.18    | 0.18 | 1.26   | 0.19   | 0.15 | -0.80    | 2.97     |
| 15-30               | 1551   | 2.12    | 0.18 | 1.34   | 0.19   | 0.14 | -1.10    | 3.47     |
| 30-60               | 1362   | 2.10    | 0.34 | 1.40   | 0.19   | 0.13 | -1.05    | 3.52     |
| 60-100              | 955    | 2.60    | 0.26 | 1.43   | 0.19   | 0.13 | -0.94    | 4.27     |
| 100-200             | 331    | 2.13    | 0.54 | 1.44   | 0.19   | 0.13 | -0.72    | 4.48     |
| <b>OC</b>           |        |         |      |        |        |      |          |          |
| 0-5                 | 9758   | 41.99   | 0.00 | 2.26   | 3.13   | 1.39 | 4.67     | 30.98    |
| 5-15                | 9164   | 61.83   | 0.00 | 2.03   | 2.78   | 1.37 | 5.67     | 55.93    |
| 15-30               | 9147   | 52.10   | 0.00 | 1.45   | 2.12   | 1.47 | 7.93     | 105.75   |
| 30-60               | 8811   | 43.07   | 0.00 | 0.97   | 1.72   | 1.77 | 10.57    | 165.14   |
| 60-100              | 7156   | 47.56   | 0.00 | 0.70   | 1.55   | 2.20 | 13.90    | 266.53   |
| 100-200             | 2306   | 45.22   | 0.00 | 0.54   | 1.83   | 3.35 | 15.04    | 271.28   |
| <b>gravel</b>       |        |         |      |        |        |      |          |          |
| 0-5                 | 1994   | 97.42   | 0.00 | 20.10  | 18.25  | 0.91 | 1.14     | 0.69     |
| 5-15                | 2041   | 95.00   | 0.00 | 20.42  | 18.27  | 0.89 | 1.10     | 0.60     |
| 15-30               | 2016   | 95.00   | 0.00 | 22.99  | 19.86  | 0.86 | 0.95     | 0.18     |
| 30-60               | 1911   | 95.33   | 0.00 | 25.64  | 21.19  | 0.83 | 0.78     | -0.25    |
| 60-100              | 1288   | 94.11   | 0.00 | 26.15  | 21.25  | 0.81 | 0.73     | -0.36    |
| 100-200             | 163    | 87.90   | 0.02 | 22.68  | 21.21  | 0.93 | 1.10     | 0.53     |
| <b>AN</b>           |        |         |      |        |        |      |          |          |
| 0-5                 | 3447   | 1295.31 | 0.90 | 145.04 | 142.00 | 0.98 | 2.71     | 9.75     |
| 5-15                | 3447   | 1279.89 | 0.95 | 132.51 | 124.07 | 0.94 | 2.82     | 11.79    |
| 15-30               | 3410   | 1326.79 | 1.12 | 99.77  | 96.81  | 0.97 | 4.04     | 28.29    |
| 30-60               | 3151   | 1425.23 | 0.65 | 68.43  | 77.99  | 1.14 | 6.36     | 67.66    |
| 60-100              | 2270   | 1010.77 | 0.62 | 51.85  | 58.11  | 1.12 | 6.48     | 73.97    |
| 100-200             | 516    | 1043.52 | 0.62 | 41.87  | 64.90  | 1.55 | 9.69     | 127.43   |
| <b>TN</b>           |        |         |      |        |        |      |          |          |
| 0-5                 | 9446   | 2.46    | 0.00 | 0.19   | 0.20   | 1.09 | 3.67     | 19.26    |
| 5-15                | 9239   | 2.46    | 0.00 | 0.17   | 0.18   | 1.06 | 4.01     | 24.93    |

| Depth interval (cm) | Number | Max    | Min   | Mean  | SD    | CV   | Skewness | Kurtosis |
|---------------------|--------|--------|-------|-------|-------|------|----------|----------|
| 15-30               | 9219   | 2.46   | 0.00  | 0.13  | 0.14  | 1.09 | 5.58     | 53.87    |
| 30-60               | 8816   | 2.49   | 0.00  | 0.09  | 0.11  | 1.24 | 8.26     | 111.67   |
| 60-100              | 7037   | 2.46   | 0.00  | 0.07  | 0.10  | 1.38 | 9.57     | 142.33   |
| 100-200             | 2219   | 1.79   | 0.00  | 0.05  | 0.09  | 1.69 | 11.89    | 179.87   |
| <b>CEC</b>          |        |        |       |       |       |      |          |          |
| 0-5                 | 6624   | 123.89 | 0.16  | 14.94 | 10.65 | 0.71 | 2.57     | 11.74    |
| 5-15                | 6627   | 124.86 | 0.52  | 14.53 | 9.86  | 0.68 | 2.47     | 11.76    |
| 15-30               | 6595   | 125.40 | 0.29  | 13.59 | 8.96  | 0.66 | 2.62     | 14.92    |
| 30-60               | 6213   | 116.03 | 0.22  | 12.71 | 8.35  | 0.66 | 2.27     | 11.12    |
| 60-100              | 4809   | 105.11 | 0.34  | 12.21 | 8.29  | 0.68 | 2.54     | 14.79    |
| 100-200             | 1539   | 102.90 | 0.28  | 12.36 | 8.00  | 0.65 | 2.14     | 13.08    |
| <b>TP</b>           |        |        |       |       |       |      |          |          |
| 0-5                 | 8229   | 12.43  | 0.00  | 0.08  | 0.17  | 1.98 | 54.57    | 3808.42  |
| 5-15                | 8229   | 12.61  | 0.00  | 0.08  | 0.17  | 2.00 | 56.58    | 4081.97  |
| 15-30               | 8193   | 14.58  | 0.00  | 0.08  | 0.18  | 2.34 | 68.24    | 5468.62  |
| 30-60               | 7822   | 15.93  | 0.00  | 0.07  | 0.19  | 2.73 | 75.01    | 6237.73  |
| 60-100              | 6160   | 16.12  | 0.00  | 0.07  | 0.21  | 3.21 | 68.67    | 5123.50  |
| 100-200             | 1882   | 0.66   | 0.00  | 0.06  | 0.05  | 0.79 | 3.55     | 24.01    |
| <b>porosity</b>     |        |        |       |       |       |      |          |          |
| 0-5                 | 734    | 74.86  | 32.11 | 52.14 | 6.49  | 0.12 | 0.35     | 0.76     |
| 5-15                | 734    | 74.15  | 30.57 | 51.41 | 6.15  | 0.12 | 0.41     | 0.80     |
| 15-30               | 732    | 78.23  | 28.42 | 49.01 | 6.07  | 0.12 | 0.81     | 1.89     |
| 30-60               | 659    | 77.09  | 22.44 | 47.40 | 6.14  | 0.13 | 0.83     | 2.61     |
| 60-100              | 469    | 78.85  | 22.91 | 46.60 | 6.02  | 0.13 | 0.69     | 2.87     |
| 100-200             | 196    | 79.42  | 23.72 | 45.92 | 6.64  | 0.14 | 0.52     | 4.08     |
| <b>TK</b>           |        |        |       |       |       |      |          |          |
| 0-5                 | 6729   | 5.24   | 0.02  | 1.95  | 0.67  | 0.34 | 0.05     | 1.17     |
| 5-15                | 6728   | 5.24   | 0.03  | 1.95  | 0.66  | 0.34 | 0.04     | 1.16     |
| 15-30               | 6698   | 5.23   | 0.03  | 1.95  | 0.66  | 0.34 | 0.03     | 1.11     |
| 30-60               | 6360   | 5.02   | 0.02  | 1.95  | 0.68  | 0.35 | 0.03     | 1.02     |
| 60-100              | 4978   | 6.16   | 0.00  | 1.93  | 0.70  | 0.36 | 0.09     | 1.06     |

| Depth interval (cm) | Number | Max     | Min    | Mean   | SD     | CV    | Skewness | Kurtosis |
|---------------------|--------|---------|--------|--------|--------|-------|----------|----------|
| 100-200             | 1344   | 5.13    | 0.00   | 1.93   | 0.63   | 0.32  | 0.18     | 1.99     |
| <b>AK</b>           |        |         |        |        |        |       |          |          |
| 0-5                 | 4984   | 6405.52 | 1.00   | 153.36 | 183.92 | 1.20  | 16.29    | 490.56   |
| 5-15                | 4990   | 7440.15 | 0.92   | 143.03 | 170.30 | 1.19  | 19.89    | 747.11   |
| 15-30               | 4951   | 7803.84 | 1.00   | 116.92 | 151.66 | 1.30  | 28.23    | 1350.57  |
| 30-60               | 4605   | 6986.45 | 1.00   | 99.69  | 139.19 | 1.40  | 28.28    | 1318.20  |
| 60-100              | 3494   | 6047.12 | 0.98   | 94.69  | 140.06 | 1.48  | 24.32    | 954.11   |
| 100-200             | 937    | 861.81  | 1.75   | 99.71  | 84.75  | 84.75 | 0.85     | 3.43     |
| <b>AP</b>           |        |         |        |        |        |       |          |          |
| 0-5                 | 4932   | 398.99  | 0.10   | 9.41   | 13.48  | 1.43  | 10.02    | 208.71   |
| 5-15                | 4934   | 443.53  | 0.10   | 8.76   | 13.16  | 1.50  | 12.68    | 323.74   |
| 15-30               | 4889   | 587.27  | 0.10   | 6.39   | 11.85  | 1.85  | 26.22    | 1193.62  |
| 30-60               | 4485   | 185.08  | 0.02   | 4.87   | 7.74   | 1.59  | 8.59     | 125.29   |
| 60-100              | 3351   | 235.83  | 0.03   | 4.73   | 8.80   | 1.86  | 11.63    | 227.95   |
| 100-200             | 882    | 74.62   | 0.06   | 4.53   | 7.11   | 1.57  | 4.89     | 33.14    |
| <b>R (wet)</b>      |        |         |        |        |        |       |          |          |
| 0-5                 | 2889   | 265.92  | 40.00  | 139.34 | 38.89  | 0.28  | -0.06    | -0.14    |
| 5-15                | 2940   | 259.30  | 23.80  | 140.47 | 37.19  | 0.26  | -0.08    | -0.16    |
| 15-30               | 2929   | 256.22  | 26.33  | 147.65 | 34.28  | 0.23  | -0.16    | 0.07     |
| 30-60               | 2808   | 256.67  | 15.27  | 156.04 | 34.23  | 0.22  | -0.23    | 0.39     |
| 60-100              | 2365   | 261.15  | 161.39 | 34.83  | 34.83  | 0.22  | -0.20    | 0.28     |
| 100-200             | 801    | 261.06  | 53.26  | 167.02 | 34.08  | 0.20  | -0.19    | 0.04     |
| <b>G (wet)</b>      |        |         |        |        |        |       |          |          |
| 0-5                 | 2889   | 266.35  | 21.00  | 117.25 | 37.87  | 0.32  | 0.07     | -0.12    |
| 5-15                | 2940   | 255.00  | 21.00  | 117.78 | 36.20  | 0.31  | 0.05     | -0.23    |
| 15-30               | 2929   | 255.00  | 21.00  | 122.59 | 33.20  | 0.27  | 0.02     | -0.17    |
| 30-60               | 2809   | 255.00  | 18.09  | 128.73 | 33.25  | 0.26  | 0.03     | -0.06    |
| 60-100              | 2365   | 257.89  | 19.81  | 133.05 | 33.87  | 0.25  | 0.01     | -0.29    |
| 100-200             | 801    | 206.33  | 40.92  | 135.84 | 32.06  | 0.24  | -0.14    | -0.41    |
| <b>B (wet)</b>      |        |         |        |        |        |       |          |          |
| 0-5                 | 2887   | 269.35  | 0.05   | 92.40  | 37.61  | 0.41  | 0.10     | 0.02     |

| Depth interval (cm) | Number | Max    | Min   | Mean   | SD    | CV   | Skewness | Kurtosis |
|---------------------|--------|--------|-------|--------|-------|------|----------|----------|
| 5-15                | 2939   | 255.00 | 0.02  | 92.17  | 36.03 | 0.39 | 0.06     | -0.20    |
| 15-30               | 2828   | 255.00 | 7.84  | 93.58  | 34.48 | 0.39 | -0.02    | -0.49    |
| 30-60               | 2808   | 255.00 | 0.51  | 96.13  | 36.14 | 0.38 | -0.00    | -0.32    |
| 60-100              | 2364   | 258.83 | 4.36  | 98.33  | 38.14 | 0.39 | -0.06    | -0.45    |
| 100-200             | 800    | 198.68 | 10.25 | 98.26  | 36.66 | 0.37 | -0.21    | -0.58    |
| <b>R (dry)</b>      |        |        |       |        |       |      |          |          |
| 0-5                 | 1738   | 265.58 | 8.00  | 145.12 | 36.70 | 0.25 | -0.14    | 0.05     |
| 5-15                | 1769   | 256.63 | 8.00  | 145.90 | 34.62 | 0.24 | -0.16    | 0.07     |
| 15-30               | 1757   | 236.48 | 8.00  | 151.26 | 32.21 | 0.21 | -0.17    | 0.19     |
| 30-60               | 1714   | 251.16 | 8.00  | 158.01 | 33.28 | 0.21 | -0.20    | 0.38     |
| 60-100              | 1502   | 257.89 | 8.00  | 163.92 | 33.97 | 0.21 | -0.34    | 0.57     |
| 100-200             | 665    | 263.26 | 8.00  | 170.09 | 33.48 | 0.20 | -0.38    | 0.80     |
| <b>G (dry)</b>      |        |        |       |        |       |      |          |          |
| 0-5                 | 1738   | 267.41 | 8.00  | 120.71 | 36.16 | 0.30 | 0.12     | 0.11     |
| 5-15                | 1769   | 256.95 | 8.00  | 121.01 | 34.17 | 0.28 | 0.10     | 0.03     |
| 15-30               | 1757   | 219.37 | 8.00  | 124.52 | 31.78 | 0.26 | 0.09     | -0.17    |
| 30-60               | 1714   | 250.37 | 8.00  | 128.70 | 32.81 | 0.25 | 0.06     | -0.22    |
| 60-100              | 1502   | 258.48 | 8.00  | 133.33 | 34.06 | 0.26 | -0.03    | -0.31    |
| 100-200             | 665    | 267.38 | 8.00  | 133.33 | 34.06 | 0.26 | -0.03    | -0.31    |
| <b>B (dry)</b>      |        |        |       |        |       |      |          |          |
| 0-5                 | 1732   | 269.53 | 8.00  | 94.91  | 37.06 | 0.39 | 0.24     | 0.34     |
| 5-15                | 1768   | 257.30 | 5.61  | 94.34  | 35.32 | 0.37 | 0.17     | 0.08     |
| 15-30               | 1756   | 213.47 | 8.00  | 95.35  | 33.29 | 0.35 | 0.06     | -0.42    |
| 30-60               | 1713   | 249.42 | 8.00  | 96.26  | 34.41 | 0.37 | 0.05     | -0.42    |
| 60-100              | 1502   | 259.21 | 8.00  | 99.22  | 38.33 | 0.39 | 0.04     | -0.39    |
| 100-200             | 668    | 268.45 | 8.00  | 103.70 | 38.75 | 0.37 | -0.07    | -0.26    |

CV: coefficient of variation; SD: standard deviation;

**Table S4. Accuracy evaluation of the soil properties prediction with CSDLv2, CSDLv1, SoilGrids 2.0, and HWSD 2.0, based on the randomly held-back soil profiles. The "Number" column indicates the number of samples used during testing. See Table 1 for the abbreviations and units of the soil properties interested.**

| Property | Depth interval | Number | CSDLv2 |       |       | CSDLv1 |        |        | SoilGrids 2.0 |       |       | HWSD 2.0 |       |        |
|----------|----------------|--------|--------|-------|-------|--------|--------|--------|---------------|-------|-------|----------|-------|--------|
|          |                |        | MEC    | RMSE  | ME    | MEC    | RMSE   | ME     | MEC           | RMSE  | ME    | MEC      | RMSE  | ME     |
| OC       | 0-5            | 848    | 0.57   | 2.04  | 0.03  | 0.16   | 2.86   | -0.51  | 0.24          | 2.72  | 1.11  | 0.04     | 3.38  | -0.50  |
|          | 5-15           | 848    | 0.56   | 1.82  | 0.02  | 0.13   | 2.60   | -0.46  | 0.46          | 2.05  | 0.08  | 0.03     | 3.05  | -1.15  |
|          | 15-30          | 842    | 0.45   | 1.51  | 0.01  | 0.12   | 2.11   | -0.36  | 0.40          | 1.64  | 0.03  | 0.04     | 2.29  | -0.82  |
|          | 30-60          | 810    | 0.40   | 1.28  | 0.01  | 0.10   | 1.76   | -0.26  | 0.34          | 1.38  | 0.01  | 0.02     | 1.83  | -0.51  |
|          | 60-100         | 653    | 0.25   | 1.30  | 0.01  | 0.08   | 1.64   | -0.23  | 0.20          | 0.54  | -0.01 | 0.03     | 1.61  | -0.36  |
|          | 100-200        | 205    | 0.23   | 0.41  | 0.03  | 0.07   | 1.82   | -0.32  | 0.13          | 1.70  | 0.04  | 0.03     | 1.58  | -0.21  |
| gravel   | 0-5            | 199    | 0.49   | 12.97 | 0.06  | 0.13   | 19.43  | -6.31  | 0.45          | 13.46 | 0.36  | 0.04     | 21.12 | -7.27  |
|          | 5-15           | 204    | 0.51   | 12.72 | 0.11  | 0.06   | 18.82  | -5.63  | 0.48          | 13.07 | 0.55  | 0.03     | 21.63 | -6.47  |
|          | 15-30          | 202    | 0.52   | 13.68 | 0.09  | 0.09   | 20.77  | -5.23  | 0.49          | 14.18 | -0.13 | 0.03     | 23.17 | -9.60  |
|          | 30-60          | 191    | 0.50   | 14.85 | 0.09  | 0.06   | 21.83  | 5.35   | 0.47          | 15.37 | -0.06 | 0.03     | 23.99 | -10.69 |
|          | 60-100         | 129    | 0.47   | 15.25 | 0.14  | 0.05   | 22.45  | 2.91   | 0.43          | 15.86 | -0.07 | 0.03     | 24.47 | -8.93  |
|          | 100-200        | 16     | 0.35   | 14.84 | 0.03  | 0.04   | 23.34  | -3.97  | 0.30          | 16.60 | 2.66  | 0.05     | 23.43 | -8.13  |
| AN       | 0-5            | 341    | 0.53   | 96.32 | 1.48  | 0.14   | 131.81 | -11.55 | -             | -     | -     | -        | -     | -      |
|          | 5-15           | 340    | 0.52   | 84.08 | 1.28  | 0.14   | 114.91 | -10.35 | -             | -     | -     | -        | -     | -      |
|          | 15-30          | 337    | 0.37   | 73.85 | 0.71  | 0.09   | 92.90  | -6.05  | -             | -     | -     | -        | -     | -      |
|          | 30-60          | 311    | 0.33   | 62.78 | 0.96  | 0.02   | 78.46  | -3.38  | -             | -     | -     | -        | -     | -      |
|          | 60-100         | 223    | 0.25   | 48.92 | 0.74  | 0.02   | 59.46  | -6.55  | -             | -     | -     | -        | -     | -      |
|          | 100-200        | 50     | 0.24   | 20.41 | -0.11 | 0.01   | 98.61  | -8.46  | -             | -     | -     | -        | -     | -      |
| TN       | 0-5            | 664    | 0.44   | 0.15  | 0.00  | 0.19   | 0.18   | -0.03  | 0.14          | 0.23  | 0.13  | 0.04     | 2.46  | -0.79  |
|          | 5-15           | 664    | 0.40   | 0.14  | 0.00  | 0.17   | 0.17   | -0.03  | 0.31          | 0.15  | 0.01  | 0.02     | 2.50  | -1.46  |
|          | 15-30          | 661    | 0.28   | 0.12  | 0.00  | 0.08   | 0.14   | -0.03  | 0.21          | 0.13  | 0.01  | 0.02     | 2.27  | -1.48  |
|          | 30-60          | 623    | 0.18   | 0.06  | 0.00  | 0.01   | 0.02   | -0.02  | 0.13          | 0.11  | 0.00  | 0.02     | 2.33  | -1.44  |
|          | 60-100         | 491    | 0.25   | 0.04  | 0.00  | 0.01   | 0.10   | -0.02  | 0.08          | 0.09  | -0.00 | 0.03     | 2.45  | -1.48  |
|          | 100-200        | 133    | 0.20   | 0.02  | 0.00  | 0.01   | 0.09   | -0.03  | 0.02          | 0.09  | 0.00  | 0.02     | 2.92  | -1.56  |
| CEC      | 0-5            | 637    | 0.34   | 8.49  | 0.16  | 0.07   | 10.23  | -1.27  | 0.17          | 11.55 | 5.58  | 0.02     | 12.37 | 1.73   |
|          | 5-15           | 637    | 0.33   | 7.90  | 0.15  | 0.06   | 9.51   | -1.22  | 0.16          | 10.27 | 4.01  | 0.02     | 11.02 | 0.69   |
|          | 15-30          | 633    | 0.28   | 7.44  | 0.13  | 0.04   | 9.10   | -1.17  | 0.14          | 9.91  | 4.50  | 0.03     | 9.23  | 0.52   |

|          |         |     |      |        |       |      |        |        |      |      |      |      |      |      |
|----------|---------|-----|------|--------|-------|------|--------|--------|------|------|------|------|------|------|
|          | 30-60   | 597 | 0.27 | 7.01   | 0.12  | 0.03 | 8.47   | -1.23  | 0.13 | 9.69 | 4.80 | 0.03 | 8.87 | 0.58 |
|          | 60-100  | 459 | 0.24 | 7.05   | 0.14  | 0.05 | 8.79   | 1.30   | 0.10 | 9.73 | 4.97 | 0.02 | 8.86 | 0.73 |
|          | 100-200 | 144 | 0.25 | 6.86   | 0.06  | 0.08 | 8.91   | 1.42   | 0.11 | 9.70 | 4.86 | 0.02 | 8.45 | 1.09 |
| TP       | 0-5     | 814 | 0.29 | 0.05   | 0.00  | 0.01 | 0.17   | -0.02  | -    | -    | -    | -    | -    | -    |
|          | 5-15    | 814 | 0.30 | 0.05   | 0.00  | 0.01 | 0.15   | -0.01  | -    | -    | -    | -    | -    | -    |
|          | 15-30   | 809 | 0.29 | 0.05   | 0.00  | 0.02 | 0.15   | -0.02  | -    | -    | -    | -    | -    | -    |
|          | 30-60   | 774 | 0.25 | 0.05   | 0.00  | 0.01 | 0.19   | -0.02  | -    | -    | -    | -    | -    | -    |
|          | 60-100  | 608 | 0.23 | 0.05   | 0.00  | 0.02 | 0.12   | -0.02  | -    | -    | -    | -    | -    | -    |
|          | 100-200 | 186 | 0.23 | 0.04   | 0.00  | 0.01 | 0.07   | -0.04  | -    | -    | -    | -    | -    | -    |
| porosity | 0-5     | 73  | 0.28 | 5.47   | -0.02 | 0.03 | 6.48   | -0.03  | -    | -    | -    | -    | -    | -    |
|          | 5-15    | 73  | 0.27 | 5.22   | -0.03 | 0.01 | 6.11   | -0.36  | -    | -    | -    | -    | -    | -    |
|          | 15-30   | 73  | 0.23 | 5.02   | -0.00 | 0.02 | 6.01   | -0.31  | -    | -    | -    | -    | -    | -    |
|          | 30-60   | 64  | 0.20 | 3.95   | 0.01  | 0.01 | 6.28   | -0.07  | -    | -    | -    | -    | -    | -    |
|          | 60-100  | 47  | 0.21 | 2.70   | -0.00 | 0.01 | 6.58   | 0.08   | -    | -    | -    | -    | -    | -    |
|          | 100-200 | 20  | 0.15 | 3.94   | 0.14  | 0.01 | 7.02   | 0.12   | -    | -    | -    | -    | -    | -    |
| TK       | 0-5     | 664 | 0.25 | 0.56   | 0.00  | 0.01 | 0.67   | -0.07  | -    | -    | -    | -    | -    | -    |
|          | 5-15    | 663 | 0.26 | 0.55   | 0.00  | 0.01 | 0.67   | -0.07  | -    | -    | -    | -    | -    | -    |
|          | 15-30   | 661 | 0.27 | 0.55   | 0.00  | 0.00 | 0.66   | -0.05  | -    | -    | -    | -    | -    | -    |
|          | 30-60   | 627 | 0.25 | 0.57   | 0.00  | 0.00 | 0.67   | -0.04  | -    | -    | -    | -    | -    | -    |
|          | 60-100  | 490 | 0.22 | 0.61   | 0.00  | 0.00 | 0.71   | -0.06  | -    | -    | -    | -    | -    | -    |
|          | 100-200 | 133 | 0.16 | 0.50   | -0.00 | 0.00 | 2.12   | -0.08  | -    | -    | -    | -    | -    | -    |
| AK       | 0-5     | 491 | 0.27 | 110.72 | 1.22  | 0.03 | 181.65 | -24.17 | -    | -    | -    | -    | -    | -    |
|          | 5-15    | 492 | 0.24 | 102.74 | 1.27  | 0.02 | 168.75 | -23.75 | -    | -    | -    | -    | -    | -    |
|          | 15-30   | 488 | 0.24 | 83.50  | 1.10  | 0.02 | 150.73 | -20.54 | -    | -    | -    | -    | -    | -    |
|          | 30-60   | 454 | 0.21 | 76.76  | 0.98  | 0.01 | 140.83 | -17.93 | -    | -    | -    | -    | -    | -    |
|          | 60-100  | 344 | 0.16 | 79.33  | 1.46  | 0.01 | 142.55 | -20.97 | -    | -    | -    | -    | -    | -    |
|          | 100-200 | 92  | 0.12 | 70.70  | 0.61  | 0.00 | 182.79 | -42.54 | -    | -    | -    | -    | -    | -    |
| AP       | 0-5     | 486 | 0.14 | 9.58   | 0.26  | 0.09 | 11.86  | -3.37  | -    | -    | -    | -    | -    | -    |
|          | 5-15    | 486 | 0.13 | 8.84   | 0.23  | 0.07 | 11.03  | -3.21  | -    | -    | -    | -    | -    | -    |
|          | 15-30   | 482 | 0.12 | 6.77   | 0.19  | 0.07 | 8.57   | -2.18  | -    | -    | -    | -    | -    | -    |
|          | 30-60   | 442 | 0.10 | 5.81   | 0.08  | 0.09 | 7.74   | -1.84  | -    | -    | -    | -    | -    | -    |
|          | 60-100  | 330 | 0.12 | 6.20   | 0.08  | 0.06 | 9.04   | -1.93  | -    | -    | -    | -    | -    | -    |
|          | 100-200 | 87  | 0.12 | 6.16   | 0.07  | 0.00 | 20.47  | -5.64  | -    | -    | -    | -    | -    | -    |

"-" indicates that the soil property was not mapped or not included in the dataset.

315 **Table S5. Predictive performance of CSDLv2, SoilGrids 2.0, CSDLv2, and HWSO 2.0 based on validation with testing profiles from WoSIS. Refer to Table 1 for the abbreviations and units of the soil properties interested.**

| Property | Depth interval | CSDLv2 |       |       | CSDLv1 |       |       | SoilGrids 2.0 |       |       | HWSO 2.0 |       |        |
|----------|----------------|--------|-------|-------|--------|-------|-------|---------------|-------|-------|----------|-------|--------|
|          |                | MEC    | RMSE  | ME    | MEC    | RMSE  | ME    | MEC           | RMSE  | ME    | MEC      | RMSE  | ME     |
| pH       | 0-5            | 0.84   | 0.57  | 0.15  | 0.64   | 0.84  | 0.08  | 0.87          | 0.51  | 0.14  | 0.51     | 0.99  | -0.17  |
|          | 5-15           | 0.85   | 0.54  | 0.14  | 0.66   | 0.81  | 0.08  | 0.88          | 0.49  | 0.14  | 0.52     | 0.97  | -0.02  |
|          | 15-30          | 0.84   | 0.56  | 0.10  | 0.29   | 1.16  | -0.37 | 0.87          | 0.49  | 0.13  | 0.57     | 0.93  | -0.04  |
|          | 30-60          | 0.85   | 0.52  | 0.11  | 0.66   | 0.80  | 0.05  | 0.87          | 0.50  | 0.10  | 0.58     | 0.91  | -0.06  |
|          | 60-100         | 0.85   | 0.53  | 0.12  | 0.67   | 0.80  | 0.46  | 0.87          | 0.51  | 0.10  | 0.58     | 0.91  | -0.07  |
|          | 100-200        | 0.84   | 0.38  | -0.03 | 0.61   | 0.90  | 0.10  | 0.86          | 0.53  | 0.13  | 0.61     | 0.92  | 0.04   |
| sand     | 0-5            | 0.79   | 9.81  | -2.36 | 0.03   | 24.10 | -9.98 | 0.75          | 10.71 | -5.46 | 0.01     | 21.44 | -2.76  |
|          | 5-15           | 0.82   | 9.21  | -2.02 | 0.05   | 23.63 | -9.69 | 0.78          | 10.05 | -5.03 | 0.06     | 21.44 | -3.81  |
|          | 15-30          | 0.83   | 9.11  | -1.33 | 0.04   | 23.59 | -8.92 | 0.81          | 9.39  | -4.26 | 0.06     | 21.03 | -2.96  |
|          | 30-60          | 0.83   | 9.24  | -1.22 | 0.03   | 23.90 | -9.01 | 0.82          | 9.41  | -4.16 | 0.12     | 20.80 | -2.11  |
|          | 60-100         | 0.84   | 9.36  | -1.57 | 0.04   | 23.91 | -8.83 | 0.79          | 10.47 | -4.51 | 0.10     | 21.50 | -1.83  |
|          | 100-200        | 0.79   | 10.77 | -3.16 | 0.01   | 26.70 | -9.99 | 0.75          | 11.99 | -5.98 | 0.01     | 23.16 | -3.37  |
| silt     | 0-5            | 0.72   | 7.56  | 3.47  | 0.03   | 19.25 | 11.27 | 0.68          | 8.24  | 3.53  | 0.05     | 15.45 | 2.78   |
|          | 5-15           | 0.74   | 7.23  | 3.17  | 0.04   | 18.93 | 11.02 | 0.73          | 7.65  | 3.05  | 0.06     | 15.19 | 1.46   |
|          | 15-30          | 0.78   | 6.66  | 2.89  | 0.03   | 19.00 | 11.08 | 0.76          | 7.13  | 2.85  | 0.07     | 14.93 | 0.94   |
|          | 30-60          | 0.76   | 6.95  | 3.09  | 0.04   | 18.75 | 10.88 | 0.73          | 7.50  | 3.05  | 0.07     | 14.75 | 1.30   |
|          | 60-100         | 0.73   | 7.42  | 3.18  | 0.05   | 18.37 | 10.04 | 0.71          | 7.91  | 3.17  | 0.07     | 14.95 | 1.27   |
|          | 100-200        | 0.74   | 7.75  | 3.14  | 0.04   | 18.53 | 9.23  | 0.72          | 8.10  | 3.62  | 0.05     | 16.67 | 2.16   |
| clay     | 0-5            | 0.74   | 5.51  | 0.15  | 0.07   | 11.84 | -1.48 | 0.71          | 6.66  | 2.33  | 0.05     | 12.01 | 0.54   |
|          | 5-15           | 0.78   | 5.10  | 0.12  | 0.11   | 11.74 | -1.75 | 0.75          | 6.24  | 2.11  | 0.04     | 12.19 | 2.86   |
|          | 15-30          | 0.78   | 5.21  | -0.35 | 0.12   | 12.62 | -2.81 | 0.79          | 6.21  | 1.66  | 0.14     | 12.33 | 2.65   |
|          | 30-60          | 0.82   | 5.36  | -0.69 | 0.17   | 13.14 | -2.45 | 0.83          | 5.98  | 1.22  | 0.20     | 12.71 | 1.08   |
|          | 60-100         | 0.85   | 5.74  | -0.61 | 0.20   | 13.34 | -2.16 | 0.82          | 6.31  | 1.21  | 0.21     | 13.18 | 0.31   |
|          | 100-200        | 0.83   | 6.21  | 0.07  | 0.18   | 13.61 | 0.48  | 0.79          | 7.01  | 2.42  | 0.14     | 13.71 | 0.72   |
| OC       | 0-5            | 0.63   | 19.88 | 1.43  | 0.08   | 31.19 | -5.26 | 0.58          | 22.34 | 9.97  | 0.04     | 35.46 | -3.31  |
|          | 5-15           | 0.53   | 24.48 | 0.55  | 0.03   | 35.18 | -5.42 | 0.35          | 30.79 | -0.17 | 0.04     | 38.59 | -10.02 |
|          | 15-30          | 0.46   | 19.08 | 0.08  | 0.02   | 25.87 | -3.24 | 0.58          | 17.71 | 0.31  | 0.05     | 28.69 | -6.77  |
|          | 30-60          | 0.36   | 9.37  | 1.24  | 0.11   | 7.40  | -0.87 | 0.33          | 6.09  | 1.15  | 0.10     | 8.14  | -2.39  |
|          | 60-100         | 0.22   | 6.62  | 1.26  | 0.04   | 4.26  | -0.46 | 0.20          | 4.71  | 0.93  | 0.11     | 5.35  | -1.12  |



|     |         |      |      |       |      |       |       |      |      |       |      |       |       |
|-----|---------|------|------|-------|------|-------|-------|------|------|-------|------|-------|-------|
|     | 100-200 | 0.16 | 9.01 | 1.37  | 0.10 | 10.09 | -2.09 | 0.15 | 7.64 | 1.15  | 0.11 | 5.38  | -0.20 |
| CEC | 0-5     | 0.23 | 7.03 | 4.85  | 0.09 | 9.28  | 4.86  | 0.24 | 6.08 | 5.12  | 0.07 | 10.30 | 3.25  |
|     | 5-15    | 0.25 | 5.80 | 3.98  | 0.07 | 9.20  | 3.21  | 0.22 | 6.10 | 4.56  | 0.05 | 11.22 | 4.37  |
|     | 15-30   | 0.25 | 5.89 | 4.16  | 0.07 | 9.19  | 3.02  | 0.23 | 5.89 | 5.22  | 0.04 | 11.56 | 4.82  |
|     | 30-60   | 0.28 | 5.34 | 4.05  | 0.12 | 8.10  | 2.51  | 0.25 | 5.92 | 5.11  | 0.07 | 9.89  | 2.89  |
|     | 60-100  | 0.25 | 5.62 | 4.13  | 0.09 | 9.25  | 4.82  | 0.21 | 6.01 | 4.72  | 0.06 | 11.02 | 3.22  |
|     | 100-200 | 0.24 | 6.42 | 4.72  | 0.06 | 9.32  | 4.20  | 0.22 | 6.13 | 4.89  | 0.03 | 12.68 | 4.93  |
| TN  | 0-5     | 0.50 | 1.53 | -0.14 | 0.21 | 1.93  | -0.42 | 0.44 | 2.23 | 0.06  | 0.26 | 1.93  | -0.34 |
|     | 5-15    | 0.53 | 1.37 | -0.11 | 0.22 | 1.77  | -0.37 | 0.52 | 1.46 | -0.05 | 0.17 | 1.89  | -0.77 |
|     | 15-30   | 0.49 | 1.05 | -0.03 | 0.33 | 1.20  | -0.25 | 0.61 | 0.95 | 0.01  | 0.44 | 1.13  | -0.49 |
|     | 30-60   | 0.34 | 1.05 | 0.02  | 0.33 | 1.05  | -0.14 | 0.58 | 0.87 | 0.01  | 0.70 | 0.74  | -0.22 |
|     | 60-100  | 0.30 | 0.91 | 0.05  | 0.26 | 0.94  | -0.13 | 0.40 | 0.88 | 0.02  | 0.67 | 0.66  | -0.08 |
|     | 100-200 | 0.13 | 0.54 | 0.03  | 0.19 | 0.64  | -0.28 | 0.21 | 0.52 | 0.05  | 0.26 | 0.61  | -0.02 |
| BD  | 0-5     | 0.68 | 0.14 | -0.01 | 0.20 | 0.28  | 0.05  | 0.63 | 0.14 | -0.01 | 0.26 | 0.34  | 0.15  |
|     | 5-15    | 0.73 | 0.13 | -0.01 | 0.12 | 0.27  | 0.04  | 0.67 | 0.12 | -0.00 | 0.21 | 0.32  | 0.17  |
|     | 15-30   | 0.70 | 0.13 | -0.02 | 0.01 | 0.24  | 0.08  | 0.72 | 0.10 | 0.02  | 0.23 | 0.32  | 0.16  |
|     | 30-60   | 0.57 | 0.15 | -0.02 | 0.01 | 0.22  | 0.04  | 0.55 | 0.16 | 0.02  | 0.15 | 0.29  | 0.15  |
|     | 60-100  | 0.56 | 0.14 | -0.05 | 0.02 | 0.20  | -0.01 | 0.55 | 0.15 | 0.01  | 0.05 | 0.26  | 0.09  |
|     | 100-200 | 0.61 | 0.11 | -0.04 | 0.11 | 0.19  | -0.02 | 0.59 | 0.11 | -0.01 | 0.11 | 0.23  | 0.05  |

**Table S6. Prediction interval coverage probability (PICP) for each soil property at multiple depths.**320 **Refer to Table 1 for the abbreviations and units of the soil properties interested.**

| property | Depth interval (cm) |      |       |       |        |         |
|----------|---------------------|------|-------|-------|--------|---------|
|          | 0-5                 | 5-15 | 15-30 | 30-60 | 60-100 | 100-200 |
| pH       | 0.90                | 0.91 | 0.91  | 0.91  | 0.91   | 0.91    |
| sand     | 0.90                | 0.90 | 0.90  | 0.90  | 0.90   | 0.91    |
| silt     | 0.91                | 0.90 | 0.90  | 0.90  | 0.90   | 0.90    |
| clay     | 0.90                | 0.90 | 0.90  | 0.90  | 0.90   | 0.90    |
| BD       | 0.90                | 0.90 | 0.91  | 0.89  | 0.89   | 0.89    |
| OC       | 0.90                | 0.90 | 0.90  | 0.90  | 0.90   | 0.90    |
| Gravel   | 0.91                | 0.90 | 0.90  | 0.89  | 0.90   | 0.90    |
| AN       | 0.90                | 0.90 | 0.91  | 0.90  | 0.90   | 0.90    |
| TN       | 0.90                | 0.91 | 0.90  | 0.90  | 0.90   | 0.90    |
| CEC      | 0.90                | 0.90 | 0.90  | 0.90  | 0.90   | 0.89    |
| Porosity | 0.90                | 0.89 | 0.90  | 0.90  | 0.90   | 0.88    |
| TK       | 0.90                | 0.90 | 0.90  | 0.90  | 0.90   | 0.90    |
| TP       | 0.90                | 0.91 | 0.90  | 0.90  | 0.90   | 0.90    |
| AK       | 0.90                | 0.90 | 0.90  | 0.90  | 0.90   | 0.90    |
| AP       | 0.90                | 0.88 | 0.90  | 0.91  | 0.90   | 0.90    |
| R(wet)   | 0.90                | 0.89 | 0.90  | 0.90  | 0.90   | 0.92    |
| G(wet)   | 0.90                | 0.90 | 0.90  | 0.91  | 0.90   | 0.90    |
| B(wet)   | 0.90                | 0.90 | 0.90  | 0.90  | 0.91   | 0.90    |
| R(dry)   | 0.90                | 0.90 | 0.89  | 0.90  | 0.90   | 0.90    |
| G(dry)   | 0.90                | 0.90 | 0.89  | 0.90  | 0.92   | 0.90    |
| B(dry)   | 0.90                | 0.90 | 0.90  | 0.91  | 0.90   | 0.90    |

325 **Table S7. Comparison of predictive performance for mean predictions using random forest model and median predictions using quantile regression Forest model across different soil properties under 'All Data,' 'High Values,' and 'Low Values' conditions based on 10-fold cross-validation. The 'All Data' condition evaluates performance on the full training set, while 'High Values' and 'Low Values' assess prediction accuracy for the top 10% highest and bottom 10% lowest values, respectively. The 'Prediction method' column documents the models constructed for generating final national-scale predictions at a 90-meter resolution for various soil properties.**

| property | Statistic<br>Validation | All Data     |               |              | High Values   |                |                 | Low Values      |               |               | Prediction    |
|----------|-------------------------|--------------|---------------|--------------|---------------|----------------|-----------------|-----------------|---------------|---------------|---------------|
|          |                         | MEC          | RMSE          | ME           | MEC           | RMSE           | ME              | MEC             | RMSE          | ME            | method        |
| pH       | Mean                    | <b>0.693</b> | <b>0.706</b>  | <b>0.001</b> | -2.923        | 0.786          | -0.564          | -7.196          | 1.023         | 0.830         | <b>Median</b> |
|          | Median                  | 0.690        | 0.709         | -0.012       | <b>-2.871</b> | <b>0.781</b>   | <b>-0.557</b>   | <b>-5.958</b>   | <b>0.943</b>  | <b>0.730</b>  | <b>(QRF)</b>  |
| sand     | Mean                    | <b>0.670</b> | <b>12.161</b> | <b>0.056</b> | <b>-8.000</b> | <b>22.178</b>  | <b>-16.260</b>  | -9.543          | 12.961        | 8.400         | Mean          |
|          | Median                  | 0.667        | 12.231        | -0.734       | -8.612        | 22.919         | -16.560         | <b>-9.070</b>   | <b>12.021</b> | <b>7.299</b>  | (RF)          |
| silt     | Mean                    | 0.615        | 9.825         | 0.023        | -4.324        | 15.014         | -10.967         | -8.659          | 15.652        | 11.526        | <b>Median</b> |
|          | Median                  | 0.614        | 9.840         | 0.003        | <b>-4.240</b> | <b>14.895</b>  | <b>-10.789</b>  | <b>-8.838</b>   | <b>15.796</b> | <b>11.139</b> | <b>(QRF)</b>  |
| clay     | Mean                    | <b>0.629</b> | <b>6.749</b>  | <b>0.019</b> | -1.328        | 12.197         | -8.221          | -23.577         | 8.543         | 6.279         | <b>Median</b> |
|          | Median                  | 0.626        | 6.771         | 0.018        | <b>-1.281</b> | <b>12.071</b>  | <b>-7.919</b>   | <b>-23.416</b>  | <b>8.515</b>  | <b>6.088</b>  | <b>(QRF)</b>  |
| BD       | Mean                    | <b>0.623</b> | <b>0.119</b>  | <b>0.001</b> | <b>-2.230</b> | <b>0.188</b>   | <b>-0.129</b>   | <b>-0.561</b>   | <b>0.208</b>  | <b>0.133</b>  | Mean          |
|          | Median                  | 0.619        | 0.120         | -0.000       | -2.351        | 0.192          | -0.133          | -0.619          | 0.212         | 0.140         | (RF)          |
| OC       | Mean                    | <b>0.570</b> | <b>2.043</b>  | <b>0.028</b> | <b>0.089</b>  | <b>5.382</b>   | <b>-2.647</b>   | -98.229         | 1.056         | 0.559         | Mean          |
|          | Median                  | 0.556        | 2.075         | -0.225       | -0.071        | 5.836          | -3.455          | <b>-69.297</b>  | <b>0.889</b>  | <b>0.464</b>  | (RF)          |
| gravel   | Mean                    | <b>0.494</b> | <b>13.010</b> | <b>0.066</b> | <b>-5.133</b> | <b>24.486</b>  | <b>-19.554</b>  | -150.920        | 10.572        | 8.463         | Mean          |
|          | Median                  | 0.483        | 13.152        | -1.542       | -5.427        | 25.067         | -19.771         | <b>-103.985</b> | <b>8.789</b>  | <b>6.430</b>  | (RF)          |
| AN       | Mean                    | <b>0.535</b> | <b>96.580</b> | <b>1.489</b> | <b>-0.671</b> | <b>224.419</b> | <b>-155.231</b> | -91.610         | 89.083        | 58.083        | Mean          |
|          | Median                  | 0.528        | 97.276        | -8.873       | -0.882        | 238.166        | -171.510        | <b>-80.097</b>  | <b>83.362</b> | <b>51.067</b> | (RF)          |
| TN       | Mean                    | <b>0.437</b> | <b>0.153</b>  | <b>0.003</b> | <b>-0.602</b> | <b>0.403</b>   | <b>-0.249</b>   | -63.525         | 0.090         | 0.066         | Mean          |

|          |        |              |                |               |                |                |                 |                |               |               |               |
|----------|--------|--------------|----------------|---------------|----------------|----------------|-----------------|----------------|---------------|---------------|---------------|
|          | Median | 0.411        | 0.157          | -0.024        | -0.950         | 0.445          | -0.310          | <b>-37.921</b> | <b>0.069</b>  | <b>0.050</b>  | (RF)          |
| CEC      | Mean   | <b>0.342</b> | <b>8.516</b>   | <b>0.168</b>  | <b>-1.280</b>  | <b>20.586</b>  | <b>-15.277</b>  | -47.768        | 7.887         | 6.714         | Mean          |
|          | Median | 0.322        | 8.644          | -1.273        | -1.706         | 22.427         | -17.579         | <b>-31.976</b> | <b>6.486</b>  | <b>5.280</b>  | (RF)          |
| porosity | Mean   | <b>0.286</b> | <b>5.496</b>   | <b>-0.028</b> | <b>-6.014</b>  | <b>9.548</b>   | <b>-8.380</b>   | <b>-10.608</b> | <b>10.167</b> | <b>9.167</b>  | Mean          |
|          | Median | 0.283        | 5.507          | 0.064         | -6.041         | 9.566          | -8.436          | -10.728        | 10.219        | 9.236         | (RF)          |
| TK       | Mean   | <b>0.254</b> | <b>0.569</b>   | <b>0.004</b>  | <b>-6.439</b>  | <b>1.133</b>   | <b>-0.985</b>   | -7.496         | -0.921        | 0.842         | Mean          |
|          | Median | 0.251        | 0.570          | -0.022        | -6.856         | 1.164          | -1.007          | <b>-6.626</b>  | <b>0.873</b>  | <b>0.772</b>  | (RF)          |
| TP       | Mean   | 0.039        | 0.153          | <b>0.001</b>  | <b>-0.073</b>  | <b>0.471</b>   | <b>-0.114</b>   | -45.798        | 0.047         | 0.040         | <b>Median</b> |
|          | Median | <b>0.042</b> | <b>0.153</b>   | -0.012        | -0.092         | 0.475          | -0.136          | <b>-23.025</b> | <b>0.034</b>  | <b>0.029</b>  | <b>(QRF)</b>  |
| AK       | Mean   | <b>0.161</b> | <b>169.589</b> | <b>1.120</b>  | <b>-0.250</b>  | <b>484.127</b> | <b>-235.202</b> | -74.502        | 91.844        | 77.809        | Mean          |
|          | Median | 0.130        | 172.666        | -24.174       | -0.413         | 514.801        | -285.971        | <b>-46.213</b> | <b>72.628</b> | <b>61.121</b> | (RF)          |
| AP       | Mean   | <b>0.137</b> | <b>10.600</b>  | <b>0.284</b>  | <b>-1.000</b>  | <b>29.102</b>  | <b>-21.562</b>  | -217.302       | 6.999         | 6.334         | Mean          |
|          | Median | 0.075        | 10.976         | -2.468        | -1.470         | 32.340         | -25.594         | <b>-90.100</b> | <b>4.521</b>  | <b>4.074</b>  | (RF)          |
| R (Wet)  | Mean   | <b>0.275</b> | <b>33.108</b>  | <b>0.032</b>  | -10.615        | 56.055         | -50.741         | -10.427        | 54.593        | 49.311        | <b>Median</b> |
|          | Median | 0.271        | 33.212         | 0.081         | <b>-10.481</b> | <b>55.730</b>  | <b>-50.198</b>  | <b>-10.363</b> | <b>54.441</b> | <b>48.539</b> | <b>(QRF)</b>  |
| G (Wet)  | Mean   | <b>0.258</b> | <b>32.333</b>  | <b>0.076</b>  | <b>-12.180</b> | <b>55.557</b>  | <b>-51.001</b>  | -24.998        | 52.446        | 48.498        | Mean          |
|          | Median | 0.244        | 32.639         | -0.777        | -12.543        | 56.317         | -51.137         | <b>-24.089</b> | <b>45.522</b> | <b>46.730</b> | (RF)          |
| B (Wet)  | Mean   | <b>0.205</b> | <b>34.046</b>  | <b>0.021</b>  | -9.174         | 57.428         | -52.629         | -75.942        | 54.758        | 50.755        | <b>Median</b> |
|          | Median | 0.193        | 34.305         | 0.934         | <b>-8.686</b>  | <b>56.034</b>  | <b>-50.974</b>  | <b>-74.629</b> | <b>54.168</b> | <b>49.383</b> | <b>(QRF)</b>  |
| R (Dry)  | Mean   | <b>0.256</b> | <b>34.204</b>  | <b>0.041</b>  | -11.524        | 58.243         | -51.861         | -11.524        | 56.236        | 50.954        | <b>Median</b> |
|          | Median | 0.249        | 34.331         | 0.095         | <b>-11.142</b> | <b>57.531</b>  | <b>-51.256</b>  | <b>-11.321</b> | <b>56.112</b> | <b>50.364</b> | <b>(QRF)</b>  |
| G (Dry)  | Mean   | <b>0.269</b> | <b>31.238</b>  | <b>0.067</b>  | <b>-11.173</b> | <b>54.248</b>  | <b>-50.843</b>  | -23.128        | 50.571        | 46.368        | Mean          |
|          | Median | 0.254        | 31.854         | 0.421         | -11.534        | 55.658         | -50.994         | <b>-22.451</b> | <b>46.358</b> | <b>43.589</b> | (RF)          |
| B (Dry)  | Mean   | <b>0.213</b> | <b>33.224</b>  | <b>0.020</b>  | -9.854         | 56.552         | -52.223         | -74.642        | 53.775        | 49.228        | <b>Median</b> |
|          | Median | 0.204        | 33.612         | 0.635         | <b>-9.347</b>  | <b>55.012</b>  | <b>-50.128</b>  | <b>-73.734</b> | <b>53.127</b> | <b>48.581</b> | <b>(QRF)</b>  |
